# Supplementary material for: Nickel-catalyzed multicomponent reaction of dinitriles and hydrazine hydrochlorides with boronic acids: access to 1,3-diaryl-1H-pyrazol-5-amines and 4,5-dihydropyridazin-3(2H)-ones
Source: Royal Society of Chemistry journal article supplement (doi:10.1039/d2qo00036a), 2022-01-01
Supplement: d2qo00036a1.pdf [file d2qo00036a1.pdf]

## Electronic Supplementary Information (ESI)

### Nickel-catalyzed multicomponent reaction of dinitriles and hydrazine hydrochlorides with boronic acids: access to 1,3-diaryl-1*H*-pyrazol-5-amines and 4,5-dihydropyridazin-3(2*H*)-ones

Lepeng Chen, Ningning Lv,\* Qianqian Zhen, Zhongyan Chen, Jingyuan Ge, Jiuxi Chen\*

*College of Chemistry & Materials Engineering, Wenzhou University, Wenzhou 325035, China.*

*E-mail: jiuxichen@wzu.edu.cn; ningninglv@wzu.edu.cn.*

*Supporting Information Placeholder*

### Table of Contents

|                                         |     |
|-----------------------------------------|-----|
| 1.General Information.....              | S2  |
| 2.Experimental Section.....             | S2  |
| 3.Analytical Data for All Products..... | S5  |
| 4. Synthetic Applications.....          | S26 |
| 5.The Mechanistic Investigations.....   | S30 |
| 6.Reference.....                        | S31 |
| 7.NMR Spectra for All Products.....     | S32 |

## 1. General Information

All chemicals were obtained from commercial sources and were used as received without any purification.  $^1\text{H}$  NMR and  $^{13}\text{C}$  NMR spectra were measured on a 500 MHz and 400 MHz Bruker spectrometer, using  $\text{DMSO-}d_6$  or  $\text{CDCl}_3$  as the solvent with tetramethylsilane (TMS) as the internal standard at room temperature. The multiplicities are reported as follows: singlet (s), doublet (d), triplet (t), doublet of doublets (dd), quarter (q), multiplet (m), and broad (br). High-resolution mass spectra (HRMS) were recorded on an electrospray ionization (ESI) quadrupole time-of-flight mass spectrometer. Analytical thin-layer chromatography (TLC) was performed on pre-coated, glass-backed silica gel plates. Flash column chromatography was performed over silica gel (300-400 mesh).

## 2. Experimental Section

### 2.1. Table S1 Optimization of reaction conditions

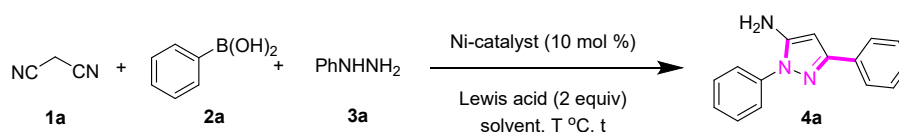

| entry                     | catalyst                                           | additive                | solvent    | yield(%) <sup>b</sup> |
|---------------------------|----------------------------------------------------|-------------------------|------------|-----------------------|
| 1                         | Ni(dppe)Cl <sub>2</sub>                            | ZnCl <sub>2</sub>       | THF        | 31                    |
| 2                         | Ni(dppe)Cl <sub>2</sub>                            | ZnCl <sub>2</sub>       | toluene    | trace                 |
| 3                         | Ni(dppe)Cl <sub>2</sub>                            | ZnCl <sub>2</sub>       | DMSO       | ND                    |
| 4                         | Ni(PPh <sub>3</sub> ) <sub>2</sub> Cl <sub>2</sub> | ZnCl <sub>2</sub>       | THF        | ND                    |
| 5                         | Ni(dppp)Cl <sub>2</sub>                            | ZnCl <sub>2</sub>       | THF        | 60                    |
| 6                         | NiCl <sub>2</sub> /dppp                            | ZnCl <sub>2</sub>       | THF        | 26                    |
| 7                         | Ni(dppp)Cl <sub>2</sub>                            | Zn(OTf) <sub>2</sub>    | THF        | 35                    |
| 8                         | Ni(dppp)Cl <sub>2</sub>                            | CuCl <sub>2</sub>       | THF        | ND                    |
| 9                         | Ni(dppp)Cl <sub>2</sub>                            | FeCl <sub>3</sub>       | THF        | ND                    |
| 10 <sup>c</sup>           | Ni(dppp)Cl <sub>2</sub>                            | ZnCl <sub>2</sub>       | THF        | 65                    |
| 11 <sup>c,d</sup>         | Ni(dppp)Cl <sub>2</sub>                            | ZnCl <sub>2</sub>       | THF        | 71                    |
| 12 <sup>c,e</sup>         | Ni(dppp)Cl <sub>2</sub>                            | ZnCl <sub>2</sub>       | THF        | 57                    |
| <b>13<sup>c,d,f</sup></b> | <b>Ni(dppp)Cl<sub>2</sub></b>                      | <b>ZnCl<sub>2</sub></b> | <b>THF</b> | <b>85</b>             |
| 14 <sup>c,d,g</sup>       | Ni(dppp)Cl <sub>2</sub>                            | ZnCl <sub>2</sub>       | THF        | 66                    |
| 15 <sup>c,d,f</sup>       | --                                                 | ZnCl <sub>2</sub>       | THF        | ND                    |
| 16 <sup>c,d,f</sup>       | Ni(dppp)Cl <sub>2</sub>                            | --                      | THF        | ND                    |

<sup>a</sup>Reaction conditions: **1a** (0.3 mmol), **2a** (0.8 mmol), **3a** (0.6 mmol), Ni-catalyst (10 mol %), Lewis acid (2 equiv), solvent (2 mL), 80 °C, 24 h, under air atmosphere. <sup>b</sup>Isolated yields. <sup>c</sup>**1a** (0.6 mmol), **2a** (0.8 mmol), **3a** (0.3 mmol) was used. <sup>d</sup>T = 100 °C. <sup>e</sup>T = 60 °C. <sup>f</sup>under N<sub>2</sub> atmosphere. <sup>g</sup>under O<sub>2</sub> atmosphere. ND represents no detected.

## 2.2. General procedure for the synthesis of 1,3-diaryl-1*H*-pyrazol-5-amines

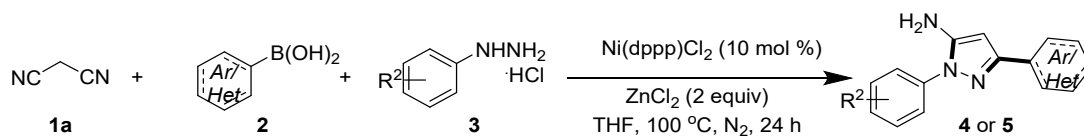

In a 10 mL Schlenk reaction tube, malononitrile (**1a**) (0.6 mmol, 2.0 equiv), organoboronic acid (**2**) (0.8 mmol, 2.6 equiv), phenylhydrazine or substituted phenylhydrazine hydrochloride (**3**) (0.3 mmol, 1.0 equiv), Ni(dppp)Cl<sub>2</sub> (0.03 mmol, 10 mol %, 16.3 mg), ZnCl<sub>2</sub> (0.6 mmol, 2.0 equiv, 81.8mg), were dissolved in tetrahydrofuran (2.0 mL) under N<sub>2</sub> atmosphere. The reaction mixture was then heated at 100 °C (oil bath) with vigorous stirring for 24 hours. After the reaction equilibrium, the mixture was poured into ethyl acetate, which was washed with saturated NaHCO<sub>3</sub> (2 × 10 mL) and then brine (1 × 10 mL). After the aqueous layer was extracted with ethyl acetate, the combined organic layers were dried over anhydrous Na<sub>2</sub>SO<sub>4</sub> and evaporated under vacuum. The filtrate was concentrated in vacuo and purified by a silica gel packed flash chromatography column with petroleum ether/ethyl acetate (5:1) as the eluent to afford the desired products **4** or **5**.

## 2.3. Scaled-up synthesis of 1,3-diphenyl-1*H*-pyrazol-5-amine

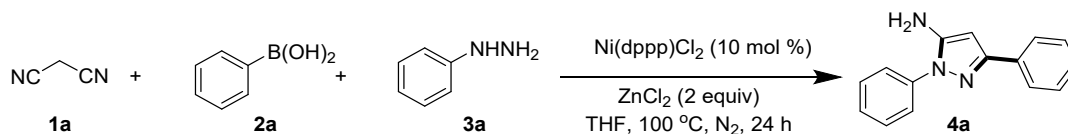

In a 100 mL Schlenk reaction tube, malononitrile (**1a**) (10 mmol, 0.66 g), phenylboronic acid (**2a**) (13.3 mmol, 1.63 g), phenylhydrazine (**3a**) (5 mmol, 0.54 g), Ni(dppp)Cl<sub>2</sub> (0.5 mmol, 10 mol %, 0.27 g), ZnCl<sub>2</sub> (10 mmol, 2.0 equiv, 1.36 g), were dissolved in tetrahydrofuran (33.3 mL) under N<sub>2</sub> atmosphere. The reaction mixture was then heated at 100 °C (oil bath) with vigorous stirring for 24 hours. After the reaction equilibrium, the mixture was poured into ethyl acetate, which was washed with saturated NaHCO<sub>3</sub> (2 × 50 mL) and then brine (1 × 50 mL). After the aqueous layer was extracted with ethyl acetate, the combined organic layers were dried over anhydrous Na<sub>2</sub>SO<sub>4</sub> and evaporated under vacuum. The filtrate was concentrated in vacuo and purified by a silica gel packed flash chromatography column with petroleum ether/ethyl acetate (5:1)

as the eluent to afford the desired product 1,3-diphenyl-1*H*-pyrazol-5-amine (**4a**, 80 %, 0.94 g).

#### 2.4. General procedure for the synthesis of 4,5-dihydropyridazin-3(2*H*)-ones

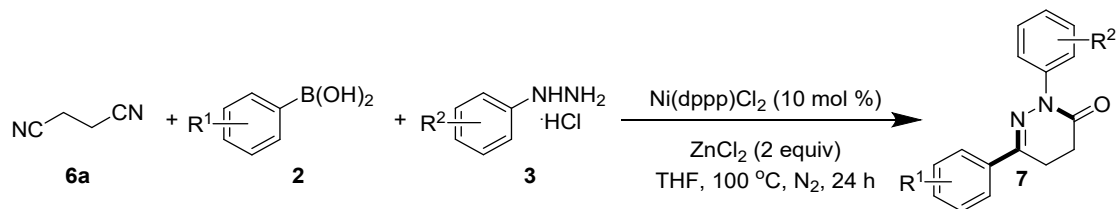

In a 10 mL Schlenk reaction tube, succinonitrile (**6a**) (0.6 mmol, 2.0 equiv), phenylboronic acid (**2**) (0.8 mmol, 2.6 equiv), phenylhydrazine or substituted phenylhydrazine hydrochloride (**3**) (0.3 mmol, 1.0 equiv), Ni(dppp)Cl<sub>2</sub> (0.03 mmol, 10 mol %, 16.3 mg), ZnCl<sub>2</sub> (0.6 mmol, 2.0 equiv, 81.8mg), were dissolved in tetrahydrofuran (2.0 mL) under N<sub>2</sub> atmosphere. The reaction mixture was then heated at 100 °C (oil bath) with vigorous stirring for 24 hours. After the reaction equilibrium, the mixture was poured into ethyl acetate, which was washed with saturated NaHCO<sub>3</sub> (2 × 10 mL) and then brine (1 × 10 mL). After the aqueous layer was extracted with ethyl acetate, the combined organic layers were dried over anhydrous Na<sub>2</sub>SO<sub>4</sub> and evaporated under vacuum. The filtrate was concentrated in vacuo and purified by a silica gel packed flash chromatography column with petroleum ether/ethyl acetate (4:1) as the eluent to afford the desired products **7**.

#### 2.5. Scaled-up synthesis of 2,6-diphenyl-4,5-dihydropyridazin-3(2*H*)-one

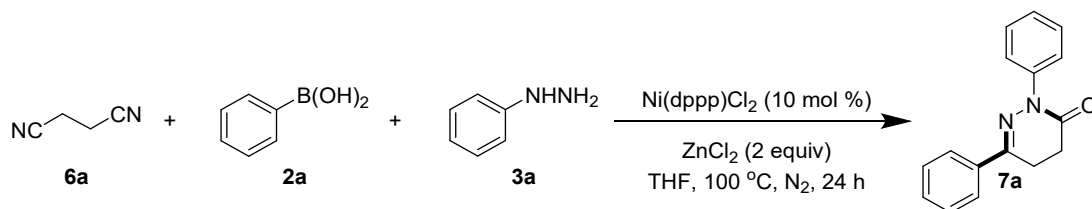

In a 100 mL Schlenk reaction tube, succinonitrile (**6a**) (10 mmol, 2.0 equiv, 0.80 g), phenylboronic acid (**2a**) (13.3 mmol, 2.6 equiv, 1.63 g), phenylhydrazine (**3a**) (5 mmol, 1.0 equiv, 0.54 g), Ni(dppp)Cl<sub>2</sub> (0.5 mmol, 10 mol %, 0.27 g), ZnCl<sub>2</sub> (10 mmol, 2.0 equiv, 1.36 g), were dissolved in tetrahydrofuran (33.3 mL) under N<sub>2</sub> atmosphere. The reaction mixture was then heated at 100 °C (oil bath) with vigorous stirring for 24 hours.

After the reaction equilibrium, the mixture was poured into ethyl acetate, which was washed with saturated NaHCO<sub>3</sub> (2 × 50 mL) and then brine (1 × 50 mL). After the aqueous layer was extracted with ethyl acetate, the combined organic layers were dried over anhydrous Na<sub>2</sub>SO<sub>4</sub> and evaporated under vacuum. The filtrate was concentrated in vacuo and purified by a silica gel packed flash chromatography column with petroleum ether/ethyl acetate (4:1) as the eluent to afford the desired product 2,6-diphenyl-4,5-dihydropyridazin-3(2H)-one (**7a**, 50 %, 0.63 g).

### 3. Analytical Data for All Products

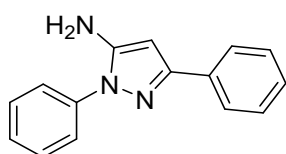

**1,3-diphenyl-1H-pyrazol-5-amine (4a):** pale brown solid (59.2 mg, 84%). mp: 129-130 °C. Column chromatography on silica gel (Eluent: petroleum ether/ethyl acetate, 5/1). **<sup>1</sup>H NMR** (500 MHz, CDCl<sub>3</sub>) δ 7.83 (d, *J* = 7.5 Hz, 2H), 7.64 (d, *J* = 8.0 Hz, 2H), 7.49 (t, *J* = 8.0 Hz, 2H), 7.41-7.35 (m, 3H), 7.31 (t, *J* = 7.5 Hz, 1H), 5.95 (s, 1H), 3.84 (br, 2H). **<sup>13</sup>C NMR** (125 MHz, CDCl<sub>3</sub>) δ 151.5, 145.8, 138.8, 133.6, 129.5, 128.5, 127.8, 127.4, 125.7, 124.2, 88.2. **HRMS (ESI)** *m/z*: [M + H]<sup>+</sup> Calcd for C<sub>15</sub>H<sub>14</sub>N<sub>3</sub> 236.1182; Found 236.1179. Spectroscopic data for the title compound were consistent with those reported in the literature.<sup>1</sup>

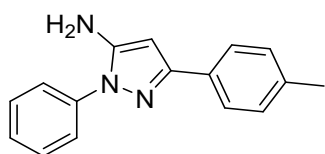

**1-phenyl-3-(p-tolyl)-1H-pyrazol-5-amine (4b):** pale brown solid (56.1 mg, 75%). mp: 169-170 °C. Column chromatography on silica gel (Eluent: petroleum ether/ethyl acetate, 5/1). **<sup>1</sup>H NMR** (500 MHz, CDCl<sub>3</sub>) δ 7.71 (d, *J* = 8.0 Hz, 2H), 7.62 (d, *J* = 7.5 Hz, 2H), 7.49 (t, *J* = 7.5 Hz, 2H), 7.36 (t, *J* = 7.0 Hz, 1H), 7.20 (d, *J* = 7.5 Hz, 2H), 5.92 (s, 1H), 3.78 (br, 2H), 2.37 (s, 3H). **<sup>13</sup>C NMR** (125MHz, CDCl<sub>3</sub>) δ 151.6, 145.9, 138.6, 137.7, 130.5, 129.5, 129.2, 127.5, 125.6, 124.2, 88.1, 21.3. **HRMS (ESI)** *m/z*: [M + H]<sup>+</sup> Calcd for C<sub>16</sub>H<sub>16</sub>N<sub>3</sub> 250.1339; Found 250.1349. Spectroscopic data for the title compound were consistent with those reported in the literature.<sup>2</sup>

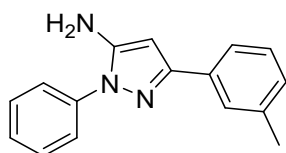

**1-phenyl-3-(*m*-tolyl)-1*H*-pyrazol-5-amine (4c):** pale brown solid (65.7 mg, 88%). mp: 128-129 °C. Column chromatography on silica gel (Eluent: petroleum ether/ethyl acetate, 5/1). <sup>1</sup>H NMR (500 MHz, CDCl<sub>3</sub>) δ 7.68 (s, 1H), 7.63 (d, *J* = 8.0 Hz, 2H), 7.59 (d, *J* = 7.5 Hz, 1H), 7.49 (t, *J* = 7.5 Hz, 2H), 7.36 (t, *J* = 7.5 Hz, 1H), 7.28 (t, *J* = 8.0 Hz, 1H), 7.13 (d, *J* = 7.5 Hz, 1H), 5.95 (s, 1H), 3.78 (br, 2H), 2.39 (s, 3H). <sup>13</sup>C NMR (125 MHz, CDCl<sub>3</sub>) δ 151.6, 145.8, 138.5, 138.1, 133.2, 129.6, 128.7, 128.4, 127.6, 125.3, 124.3, 122.9, 88.2, 21.5. HRMS (ESI) *m/z*: [M + H]<sup>+</sup> Calcd for C<sub>16</sub>H<sub>16</sub>N<sub>3</sub> 250.1339; Found 250.1339.

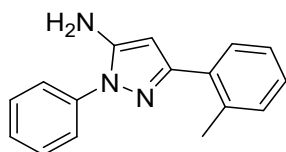

**1-phenyl-3-(*o*-tolyl)-1*H*-pyrazol-5-amine (4d):** Yellow Oil (20.2 mg, 27%). Column chromatography on silica gel (Eluent: petroleum ether/ethyl acetate, 5/1). <sup>1</sup>H NMR (500 MHz, CDCl<sub>3</sub>) δ 7.66 (d, *J* = 8.0 Hz, 2H), 7.60-7.59 (m, 1H), 7.49 (t, *J* = 7.5 Hz, 2H), 7.35 (t, *J* = 7.5 Hz, 1H), 7.23-7.21 (m, 3H), 5.83 (s, 1H), 3.85 (br, 2H), 2.54 (s, 3H). <sup>13</sup>C NMR (125 MHz, CDCl<sub>3</sub>) δ 152.2, 144.8, 136.2, 133.4, 130.7, 129.4, 129.2, 127.6, 127.2, 125.7, 123.9, 91.5, 21.2. HRMS (ESI) *m/z*: [M + H]<sup>+</sup> Calcd for C<sub>16</sub>H<sub>16</sub>N<sub>3</sub> 250.1339; Found 250.1342.

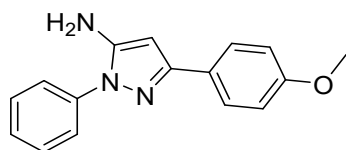

**3-(4-methoxyphenyl)-1-phenyl-1*H*-pyrazol-5-amine (4e):** White solid (37.4 mg, 47%). mp: 184-185 °C. Column chromatography on silica gel (Eluent: petroleum ether/ethyl acetate, 5/1). <sup>1</sup>H NMR (500 MHz, CDCl<sub>3</sub>) δ 7.75 (d, *J* = 8.5 Hz, 2H), 7.63 (d, *J* = 7.5 Hz, 2H), 7.49 (t, *J* = 7.5 Hz, 2H), 7.36 (t, *J* = 7.5 Hz, 1H), 6.92 (d, *J* = 8.0 Hz, 2H), 5.91 (s, 1H), 3.83 (s, 3H). <sup>13</sup>C NMR (125 MHz, CDCl<sub>3</sub>) δ 159.6, 151.3, 145.8, 138.6, 129.5, 127.4, 127.0, 125.1, 124.2, 113.9, 87.9, 55.3. HRMS (ESI) *m/z*: [M + H]<sup>+</sup> Calcd for C<sub>16</sub>H<sub>16</sub>N<sub>3</sub>O 266.1288; Found 266.1282. Spectroscopic data for the title

compound were consistent with those reported in the literature.<sup>2</sup>

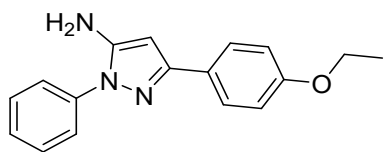

**3-(4-ethoxyphenyl)-1-phenyl-1H-pyrazol-5-amine (4f):** White solid (42.7 mg, 51%). mp: 186-188 °C. Column chromatography on silica gel (Eluent: petroleum ether/ethyl acetate, 5/1). <sup>1</sup>H NMR (500 MHz, DMSO-*d*<sub>6</sub>) δ 7.67-7.64 (m, 4H), 7.49 (t, *J* = 8.0 Hz, 2H), 7.32 (t, *J* = 7.5 Hz, 1H), 6.93 (d, *J* = 9.0 Hz, 2H), 5.84 (s, 1H), 5.40 (br, 2H), 4.04 (q, *J* = 7.0 Hz, 2H), 1.33 (t, *J* = 7.0 Hz, 3H). <sup>13</sup>C NMR (125 MHz, DMSO-*d*<sub>6</sub>) δ 158.6, 150.4, 148.6, 139.9, 129.6, 125.8, 125.7, 125.5, 123.2, 114.8, 87.3, 63.5, 15.2. HRMS (ESI) *m/z*: [M + H]<sup>+</sup> Calcd for C<sub>17</sub>H<sub>18</sub>N<sub>3</sub>O 280.1444; Found 280.1447.

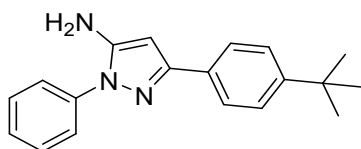

**3-(4-(*tert*-butyl)phenyl)-1-phenyl-1H-pyrazol-5-amine (4g):** White solid (41.0 mg, 47%). mp: 165-166 °C. Column chromatography on silica gel (Eluent: petroleum ether/ethyl acetate, 5/1). <sup>1</sup>H NMR (500 MHz, CDCl<sub>3</sub>) δ 7.74 (d, *J* = 8.5 Hz, 2H), 7.62 (d, *J* = 8.0 Hz, 2H), 7.49 (t, *J* = 8.0 Hz, 2H), 7.41 (d, *J* = 8.5 Hz, 2H), 7.36 (t, *J* = 7.5 Hz, 1H), 5.94 (s, 1H), 3.81 (br, 2H), 1.34 (s, 9H). <sup>13</sup>C NMR (125 MHz, CDCl<sub>3</sub>) δ 151.5, 151.0, 145.8, 138.6, 130.5, 129.5, 129.3, 127.5, 125.4, 124.2, 88.2, 34.6, 31.4. HRMS (ESI) *m/z*: [M + H]<sup>+</sup> Calcd for C<sub>19</sub>H<sub>22</sub>N<sub>3</sub> 292.1808; Found 292.1804.

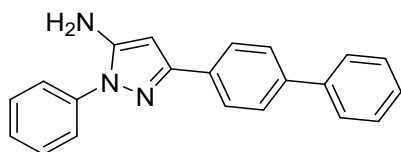

**3-([1,1'-biphenyl]-4-yl)-1-phenyl-1H-pyrazol-5-amine (4h):** White solid (60.7 mg, 65%). mp: 217-218 °C. Column chromatography on silica gel (Eluent: petroleum ether/ethyl acetate, 5/1). <sup>1</sup>H NMR (500 MHz, DMSO-*d*<sub>6</sub>) δ 7.85 (d, *J* = 8.5 Hz, 2H), 7.70 (t, *J* = 7.5 Hz, 6H), 7.53-7.46 (m, 4H), 7.38-7.34 (m, 2H), 5.98 (s, 1H), 5.47 (br, 2H). <sup>13</sup>C NMR (125 MHz, DMSO-*d*<sub>6</sub>) δ 149.6, 148.3, 139.8, 139.3, 139.1, 132.8, 129.1, 128.9, 127.4, 125.7, 125.4, 125.3, 125.6, 122.9, 87.3. HRMS (ESI) *m/z*: [M + H]<sup>+</sup> Calcd for C<sub>21</sub>H<sub>18</sub>N<sub>3</sub> 312.1495; Found 312.1483.

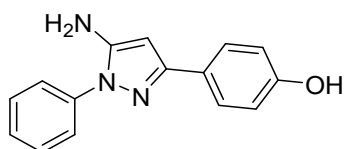

**4-(5-amino-1-phenyl-1H-pyrazol-3-yl)phenol (4i):** white solid (36.9 mg, 49%), mp: 189-192 °C. Column chromatography on silica gel (Eluent: petroleum ether/ethyl acetate, 5/1). <sup>1</sup>H NMR (400 MHz, DMSO-*d*<sub>6</sub>) δ 9.45 (s, 1H), 7.64 (d, *J* = 8.0 Hz, 2H), 7.56 (d, *J* = 8.4 Hz, 2H), 7.48 (t, *J* = 8.0 Hz, 2H), 7.31 (t, *J* = 7.6 Hz, 1H), 6.77 (d, *J* = 8.4 Hz, 2H), 5.79 (s, 1H), 5.36 (br, 2H). <sup>13</sup>C NMR (101 MHz, DMSO-*d*<sub>6</sub>) δ 157.6, 150.8, 148.5, 140.0, 129.6, 125.9, 125.4, 125.3, 123.2, 115.7, 87.2. **HRMS (ESI)** *m/z*: [M + H]<sup>+</sup> Calcd for C<sub>15</sub>H<sub>14</sub>N<sub>3</sub>O 252.1131; Found 252.1140.

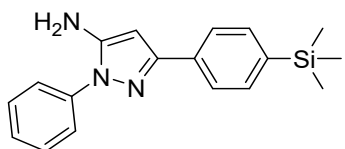

**1-phenyl-3-(4-(trimethylsilyl)phenyl)-1H-pyrazol-5-amine (4j):** White solid (35.9 mg, 39%). mp: 141-143 °C. Column chromatography on silica gel (Eluent: petroleum ether/ethyl acetate, 5/1). <sup>1</sup>H NMR (400 MHz, CDCl<sub>3</sub>) δ 7.80 (d, *J* = 8.0 Hz, 2H), 7.63 (d, *J* = 8.0 Hz, 2H), 7.55 (d, *J* = 8.0 Hz, 2H), 7.49 (t, *J* = 7.6 Hz, 2H), 7.36 (t, *J* = 7.6 Hz, 1H), 5.96 (s, 1H), 3.86 (br, 2H), 0.29 (s, 9H). <sup>13</sup>C NMR (101 MHz, CDCl<sub>3</sub>) δ 151.6, 145.8, 140.0, 138.7, 133.9, 133.6, 129.6, 127.5, 124.9, 124.2, 88.3, -1.0. **HRMS (ESI)** *m/z*: [M + H]<sup>+</sup> Calcd for C<sub>18</sub>H<sub>22</sub>N<sub>3</sub>Si 308.1578; Found 308.1581.

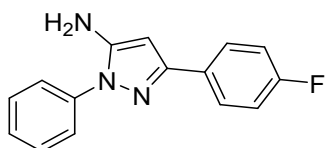

**3-(4-fluorophenyl)-1-phenyl-1H-pyrazol-5-amine (4k):** White solid (59.2 mg, 78%). mp: 157-158 °C. Column chromatography on silica gel (Eluent: petroleum ether/ethyl acetate, 5/1). <sup>1</sup>H NMR (500 MHz, CDCl<sub>3</sub>) δ 7.80-7.77 (m, 2H), 7.63 (d, *J* = 8.0 Hz, 2H), 7.50 (t, *J* = 7.5 Hz, 2H), 7.37 (t, *J* = 7.5 Hz, 1H), 7.07 (t, *J* = 8.5 Hz, 2H), 5.92 (s, 1H), 3.87 (br, 2H). <sup>13</sup>C NMR (125 MHz, CDCl<sub>3</sub>) δ 162.7 (C-F, <sup>1</sup>*J*<sub>C-F</sub> = 245.0), 150.6, 146.0, 138.5, 129.6, 127.6, 127.4, 127.3, 124.2, 115.4 (C-F, <sup>2</sup>*J*<sub>C-F</sub> = 21.3), 88.0. **HRMS (ESI)** *m/z*: [M + H]<sup>+</sup> Calcd for C<sub>15</sub>H<sub>13</sub>FN<sub>3</sub> 254.1088; Found 254.1081. Spectroscopic data for the title compound were consistent with those reported in the literature.<sup>2</sup>



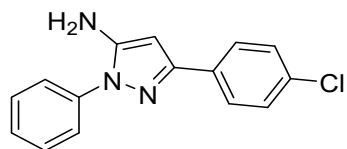

**3-(4-chlorophenyl)-1-phenyl-1H-pyrazol-5-amine (4l):** White solid (65.4 mg, 81%). mp: 186-187 °C. Column chromatography on silica gel (Eluent: petroleum ether/ethyl acetate, 5/1). **<sup>1</sup>H NMR** (500 MHz, CDCl<sub>3</sub>) δ 7.75 (d, *J* = 8.0 Hz, 2H), 7.63 (d, *J* = 7.5 Hz, 2H), 7.51 (t, *J* = 7.5 Hz, 2H), 7.40-7.34 (m, 3H), 5.94 (s, 1H), 3.87 (br, 2H). **<sup>13</sup>C NMR** (125 MHz, CDCl<sub>3</sub>) δ 150.4, 146.0, 138.4, 133.6, 131.9, 129.6, 128.7, 127.7, 125.9, 124.2, 88.0. **HRMS (ESI)** *m/z*: [M + H]<sup>+</sup> Calcd for C<sub>15</sub>H<sub>13</sub>ClN<sub>3</sub> 270.0793; Found 270.0798.

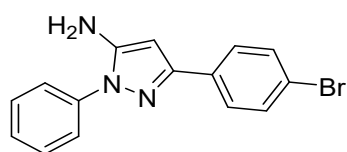

**3-(4-bromophenyl)-1-phenyl-1H-pyrazol-5-amine (4m):** White solid (70.4 mg, 75%). mp: 208-210 °C. Column chromatography on silica gel (Eluent: petroleum ether/ethyl acetate, 4/1). **<sup>1</sup>H NMR** (500 MHz, DMSO-*d*<sub>6</sub>) δ 7.71 (d, *J* = 8.0 Hz, 2H), 7.65 (d, *J* = 8.0 Hz, 2H), 7.57 (d, *J* = 8.5 Hz, 2H), 7.51 (t, *J* = 8.0 Hz, 2H), 7.35 (t, *J* = 8.0 Hz, 1H), 5.93 (s, 1H), 5.49 (br, 2H). **<sup>13</sup>C NMR** (125 MHz, DMSO-*d*<sub>6</sub>) δ 148.9, 148.4, 139.1, 132.9, 131.4, 129.1, 127.0, 125.4, 123.0, 120.4, 87.2. **HRMS (ESI)** *m/z*: [M + H]<sup>+</sup> Calcd for C<sub>15</sub>H<sub>13</sub>BrN<sub>3</sub> 314.0287; Found 314.0281.

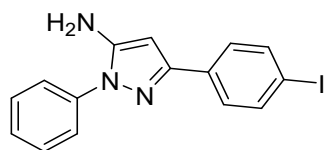

**3-(4-iodophenyl)-1-phenyl-1H-pyrazol-5-amine (4n):** White solid (66.1 mg, 61%). mp: 228-230 °C. Column chromatography on silica gel (Eluent: petroleum ether/ethyl acetate, 4/1). **<sup>1</sup>H NMR** (500 MHz, DMSO-*d*<sub>6</sub>) δ 7.74 (d, *J* = 8.5 Hz, 2H), 7.65 (d, *J* = 7.5 Hz, 2H), 7.56 (d, *J* = 8.5 Hz, 2H), 7.50 (t, *J* = 7.5 Hz, 2H), 7.35 (t, *J* = 7.5 Hz, 1H), 5.92 (s, 1H), 5.47 (br, 2H). **<sup>13</sup>C NMR** (125 MHz, DMSO-*d*<sub>6</sub>) δ 149.0, 148.4, 139.1, 137.2, 133.2, 129.1, 127.1, 125.4, 123.0, 93.2, 87.1. **HRMS (ESI)** *m/z*: [M + H]<sup>+</sup> Calcd for C<sub>15</sub>H<sub>13</sub>IN<sub>3</sub> 362.0149; Found 362.0149.

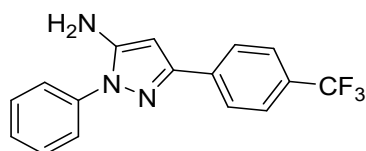

**1-phenyl-3-(4-(trifluoromethyl)phenyl)-1H-pyrazol-5-amine (4o):** White solid (63.7 mg, 70%). mp: 208-210 °C. Column chromatography on silica gel (Eluent: petroleum ether/ethyl acetate, 5/1). **<sup>1</sup>H NMR** (500 MHz, DMSO-*d*<sub>6</sub>) δ 7.97 (d, *J* = 8.0 Hz, 2H), 7.74 (d, *J* = 8.5 Hz, 2H), 7.67 (d, *J* = 8.0 Hz, 2H), 7.52 (t, *J* = 8.0 Hz, 2H), 7.37 (t, *J* = 7.5 Hz, 1H), 6.02 (s, 1H), 5.54 (br, 2H). **<sup>13</sup>C NMR** (125 MHz, DMSO-*d*<sub>6</sub>) δ 148.6, 148.5, 139.0, 137.6, 129.2, 127.6 (C-F, <sup>2</sup>*J*<sub>C-F</sub> = 32.5 Hz), 126.6, 125.4 (C-F, <sup>3</sup>*J*<sub>C-F</sub> = 3.8 Hz), 124.3(C-F, <sup>1</sup>*J*<sub>C-F</sub> = 300.0 Hz), 123.3, 87.5. **HRMS (ESI)** *m/z*: [M + H]<sup>+</sup> Calcd for C<sub>16</sub>H<sub>13</sub>F<sub>3</sub>N<sub>3</sub> 304.1056; Found 304.1052.

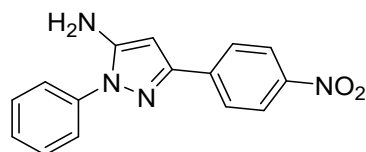

**3-(4-nitrophenyl)-1-phenyl-1H-pyrazol-5-amine (4p):** Yellow solid (52.9 mg, 63%). mp: 178-179 °C. Column chromatography on silica gel (Eluent: petroleum ether/ethyl acetate, 5/1). **<sup>1</sup>H NMR** (500 MHz, CDCl<sub>3</sub>) δ 8.24 (d, *J* = 8.5 Hz, 2H), 7.97 (d, *J* = 8.5 Hz, 2H), 7.64 (d, *J* = 7.5 Hz, 2H), 7.53 (t, *J* = 7.0 Hz, 2H), 7.42 (t, *J* = 7.0 Hz, 1H), 6.04 (s, 1H), 3.91 (br, 2H). **<sup>13</sup>C NMR** (125 MHz, CDCl<sub>3</sub>) δ 149.1, 147.2, 146.4, 139.8, 138.2, 129.7, 128.1, 125.0, 124.3, 124.0, 88.6. **HRMS (ESI)** *m/z*: [M + H]<sup>+</sup> Calcd for C<sub>15</sub>H<sub>13</sub>N<sub>4</sub>O<sub>2</sub> 281.1033; Found 281.1030.

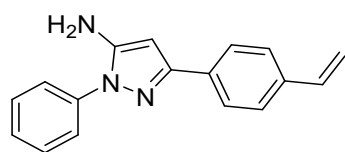

**1-phenyl-3-(4-vinylphenyl)-1H-pyrazol-5-amine (4q):** White solid (30.6mg, 39%). mp: 157-159 °C. Column chromatography on silica gel (Eluent: petroleum ether/ethyl acetate, 5/1). **<sup>1</sup>H NMR** (500 MHz, CDCl<sub>3</sub>) δ 7.78 (d, *J* = 8.0 Hz, 2H), 7.64 (d, *J* = 7.5 Hz, 2H), 7.51-7.48 (m, 2H), 7.44 (d, *J* = 8.0 Hz, 2H), 7.38-7.35 (m, 1H), 6.74 (dd, *J* = 17.5, 11.0 Hz, 1H), 5.96 (s, 1H), 5.78 (d, *J* = 17.5 Hz, 1H), 5.25 (d, *J* = 10.5 Hz, 1H), 3.86 (br, 2H). **<sup>13</sup>C NMR** (125 MHz, CDCl<sub>3</sub>) δ 151.2, 145.8, 138.7, 137.1, 136.7, 133.0,

129.5, 127.5, 125.4, 125.7, 124.2, 113.6, 88.2. **HRMS (ESI)**  $m/z$ :  $[M + H]^+$  Calcd for  $C_{17}H_{16}N_3$  262.1339; Found 262.1346.

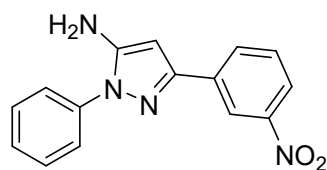

**3-(3-nitrophenyl)-1-phenyl-1H-pyrazol-5-amine (4r):** Yellow solid (62.2 mg, 74%). mp: 140-141 °C. Column chromatography on silica gel (Eluent: petroleum ether/ethyl acetate, 5/1).  **$^1H$  NMR** (500 MHz,  $CDCl_3$ )  $\delta$  8.62 (s, 1H), 8.17-8.13 (m, 2H), 7.64 (d,  $J = 8.0$  Hz, 2H), 7.56-7.51 (m, 3H), 7.41 (t,  $J = 7.5$  Hz, 1H), 6.03 (s, 1H), 3.93 (br, 2H).  **$^{13}C$  NMR** (125 MHz,  $CDCl_3$ )  $\delta$  149.2, 148.7, 146.3, 138.4, 135.5, 131.3, 129.6, 129.4, 127.9, 124.2, 122.3, 120.4, 88.2. **HRMS (ESI)**  $m/z$ :  $[M + H]^+$  Calcd for  $C_{15}H_{13}N_4O_2$  281.1033; Found 281.1040.

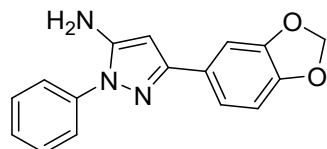

**3-(benzo[d][1,3]dioxol-5-yl)-1-phenyl-1H-pyrazol-5-amine (4s):** White solid (74.5 mg, 89%). mp: 153-154 °C. Column chromatography on silica gel (Eluent: petroleum ether/ethyl acetate, 5/1).  **$^1H$  NMR** (500 MHz,  $CDCl_3$ )  $\delta$  7.62 (d,  $J = 8.0$  Hz, 2H), 7.49 (t,  $J = 8.0$  Hz, 2H), 7.37-7.34 (m, 2H), 7.29 (d,  $J = 8.0$  Hz, 1H), 6.83 (d,  $J = 8.0$  Hz, 1H), 5.97 (s, 2H), 5.87 (s, 1H), 3.85 (br, 2H).  **$^{13}C$  NMR** (125 MHz,  $CDCl_3$ )  $\delta$  151.3, 147.9, 147.4, 145.8, 138.6, 129.5, 127.8, 127.4, 124.1, 119.4, 108.3, 106.3, 101.0, 88.0. **HRMS (ESI)**  $m/z$ :  $[M + H]^+$  Calcd for  $C_{16}H_{14}N_3O_2$  280.1081; Found 280.1091.

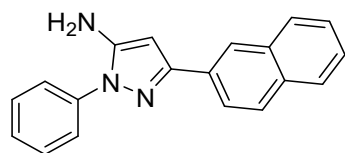

**3-(naphthalen-2-yl)-1-phenyl-1H-pyrazol-5-amine (4t):** White solid (52.2 mg, 61%). mp: 191-193 °C. Column chromatography on silica gel (Eluent: petroleum ether/ethyl acetate, 5/1).  **$^1H$  NMR** (500 MHz,  $CDCl_3$ )  $\delta$  8.26 (s, 1H), 8.02-8.00 (m, 1H), 7.88-7.82 (m, 3H), 7.68 (d,  $J = 7.5$  Hz, 2H), 7.52 (t,  $J = 8.0$  Hz, 2H), 7.49-7.44 (m, 2H), 7.39 (t,  $J = 7.5$  Hz, 1H), 6.11 (s, 1H), 3.89 (br, 2H).  **$^{13}C$  NMR** (125 MHz,  $CDCl_3$ )  $\delta$

151.5, 146.0, 138.6, 133.6, 133.2, 130.8, 129.6, 128.3, 128.1, 127.7, 127.6, 125.1, 125.8, 124.3, 124.1, 88.4. **HRMS (ESI)**  $m/z$ :  $[M + H]^+$  Calcd for  $C_{19}H_{16}N_3$  286.1339; Found 286.1326.

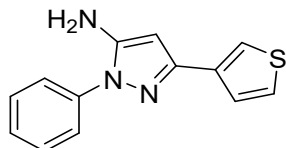

**1-phenyl-3-(thiophen-3-yl)-1H-pyrazol-5-amine (4u):** White solid (31.8 mg, 44%). mp: 158-160 °C. Column chromatography on silica gel (Eluent: petroleum ether/ethyl acetate, 5/1).  **$^1H$  NMR** (500 MHz,  $CDCl_3$ )  $\delta$  7.62-7.58 (m, 3H), 7.49 (t,  $J = 8.5$  Hz, 3H), 7.38-7.32 (m, 2H), 5.86 (s, 1H), 3.85 (br, 2H).  **$^{13}C$  NMR** (125 MHz,  $CDCl_3$ )  $\delta$  148.0, 145.6, 138.6, 135.4, 129.5, 127.5, 125.1, 125.6, 124.3, 120.8, 88.5. **HRMS (ESI)**  $m/z$ :  $[M + H]^+$  Calcd for  $C_{13}H_{12}N_3S$  242.0746; Found 242.0743.

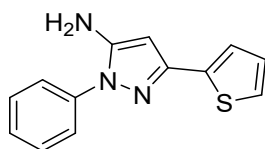

**1-phenyl-3-(thiophen-2-yl)-1H-pyrazol-5-amine (4v):** White solid (34.7 mg, 48%). mp: 117-118 °C. Column chromatography on silica gel (Eluent: petroleum ether/ethyl acetate, 5/1).  **$^1H$  NMR** (500 MHz,  $CDCl_3$ )  $\delta$  7.60 (d,  $J = 7.5$  Hz, 2H), 7.48 (t,  $J = 7.5$  Hz, 2H), 7.37-7.33 (m, 2H), 7.24-7.23 (m, 1H), 7.05-7.03 (m, 1H), 5.86 (s, 1H), 3.82 (br, 2H).  **$^{13}C$  NMR** (125 MHz,  $CDCl_3$ )  $\delta$  146.9, 145.8, 138.4, 136.9, 129.5, 127.6, 127.3, 124.5, 124.3, 123.9, 88.2. **HRMS (ESI)**  $m/z$ :  $[M + H]^+$  Calcd for  $C_{13}H_{12}N_3S$  242.0746; Found 242.0755.

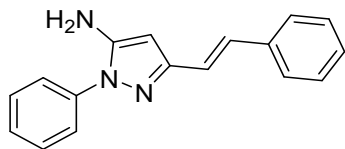

**(E)-1-phenyl-3-styryl-1H-pyrazol-5-amine (4w):** White solid (18.1 mg, 23%). mp: 120-123 °C. Column chromatography on silica gel (Eluent: petroleum ether/ethyl acetate, 5/1).  **$^1H$  NMR** (400 MHz,  $CDCl_3$ )  $\delta$  7.59 (d,  $J = 8.0$  Hz, 2H), 7.50-7.47 (m, 4H), 7.38-7.32 (m, 3H), 7.25 (d,  $J = 5.6$  Hz, 1H), 7.09 (d,  $J = 16.4$  Hz, 1H), 7.03 (d,  $J = 16.4$  Hz, 1H), 5.88 (s, 1H), 3.84 (br, 2H).  **$^{13}C$  NMR** (101 MHz,  $CDCl_3$ )  $\delta$  151.0, 145.7, 138.5, 137.3, 130.3, 129.6, 128.7, 127.6, 127.5, 125.5, 124.0, 121.2, 87.5.

**HRMS (ESI) m/z:**  $[M + H]^+$  Calcd for  $C_{17}H_{16}N_3$  262.1339; Found 262.1343.

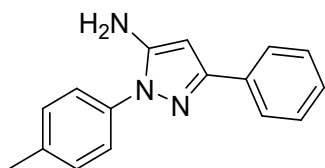

**3-phenyl-1-(p-tolyl)-1H-pyrazol-5-amine (5a):** White solid (54.5 mg, 73%). mp: 141-143 °C. Column chromatography on silica gel (Eluent: petroleum ether/ethyl acetate, 5/1). **<sup>1</sup>H NMR** (500 MHz,  $CDCl_3$ )  $\delta$  7.81 (d,  $J = 7.5$  Hz, 2H), 7.49 (d,  $J = 8.0$  Hz, 2H), 7.38 (t,  $J = 8.0$  Hz, 2H), 7.31-7.28 (m, 3H), 5.95 (s, 1H), 3.83 (br, 2H), 2.41 (s, 3H). **<sup>13</sup>C NMR** (125 MHz,  $CDCl_3$ )  $\delta$  151.3, 145.8, 137.5, 136.1, 133.6, 130.1, 128.5, 127.7, 125.6, 124.2, 87.9, 21.1. **HRMS (ESI) m/z:**  $[M + H]^+$  Calcd for  $C_{16}H_{16}N_3$  250.1339; Found 250.1340.

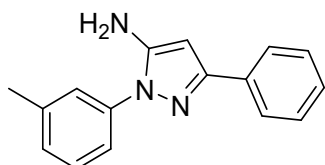

**3-phenyl-1-(m-tolyl)-1H-pyrazol-5-amine (5b):** White solid (48.6 mg, 65%). mp: 90-91 °C. Column chromatography on silica gel (Eluent: petroleum ether/ethyl acetate, 5/1). **<sup>1</sup>H NMR** (400 MHz,  $CDCl_3$ )  $\delta$  7.82 (d,  $J = 8.0$  Hz, 2H), 7.46 (s, 1H), 7.41-7.29 (m, 5H), 7.18 (d,  $J = 7.2$  Hz, 1H), 5.93 (s, 1H), 3.86 (br, 2H), 2.42 (s, 3H). **<sup>13</sup>C NMR** (101 MHz,  $CDCl_3$ )  $\delta$  151.4, 145.9, 139.7, 138.5, 133.6, 129.2, 128.5, 128.3, 127.8, 125.7, 125.0, 121.1, 88.0, 21.4. **HRMS (ESI) m/z:**  $[M + H]^+$  Calcd for  $C_{16}H_{16}N_3$  250.1339; Found 250.1337.

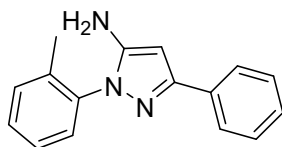

**3-phenyl-1-(o-tolyl)-1H-pyrazol-5-amine (5c):** Yellow oil (47.1 mg, 63%). Column chromatography on silica gel (Eluent: petroleum ether/ethyl acetate, 5/1). **<sup>1</sup>H NMR** (500 MHz,  $CDCl_3$ )  $\delta$  7.81 (d,  $J = 7.5$  Hz, 2H), 7.41-7.34 (m, 5H), 7.31-7.28 (m, 2H), 5.94 (s, 1H), 3.61 (br, 2H), 2.21 (s, 3H). **<sup>13</sup>C NMR** (125 MHz,  $CDCl_3$ )  $\delta$  151.3, 146.4, 137.0, 136.8, 133.8, 131.4, 129.4, 128.4, 128.1, 127.6, 125.9, 125.6, 86.5, 17.5. **HRMS**

(ESI) m/z: [M + H]<sup>+</sup> Calcd for C<sub>16</sub>H<sub>16</sub>N<sub>3</sub> 250.1339; Found 250.1346.

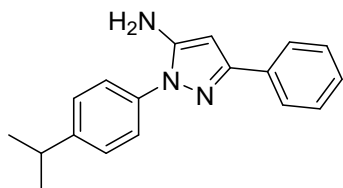

**1-(4-isopropylphenyl)-3-phenyl-1H-pyrazol-5-amine (5d):** White solid (51.6 mg, 62%). mp: 132-133 °C. Column chromatography on silica gel (Eluent: petroleum ether/ethyl acetate, 5/1). <sup>1</sup>H NMR (500 MHz, CDCl<sub>3</sub>) δ 7.83 (d, *J* = 7.5 Hz, 2H), 7.52 (d, *J* = 8.5 Hz, 2H), 7.39 (t, *J* = 7.5 Hz, 2H), 7.35-7.29 (m, 3H), 5.93 (s, 1H), 3.84 (br, 2H), 3.01-2.93 (m, 1H), 1.29 (d, *J* = 7.0 Hz, 6H). <sup>13</sup>C NMR (125 MHz, CDCl<sub>3</sub>) δ 151.2, 148.5, 145.8, 136.3, 133.6, 128.5, 127.7, 127.5, 125.6, 124.3, 87.9, 33.9, 24.0. HRMS (ESI) m/z: [M + H]<sup>+</sup> Calcd for C<sub>18</sub>H<sub>20</sub>N<sub>3</sub> 278.1652; Found 278.1620.

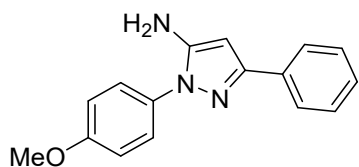

**1-(4-methoxyphenyl)-3-phenyl-1H-pyrazol-5-amine (5e):** White solid (38.2 mg, 48%). mp: 183-184 °C. Column chromatography on silica gel (Eluent: petroleum ether/ethyl acetate, 5/1). <sup>1</sup>H NMR (500 MHz, CDCl<sub>3</sub>) δ 7.80 (d, *J* = 7.5 Hz, 2H), 7.51 (d, *J* = 8.5 Hz, 2H), 7.38 (t, *J* = 7.5 Hz, 2H), 7.29 (t, *J* = 7.0 Hz, 1H), 7.01 (d, *J* = 8.5 Hz, 2H), 5.95 (s, 1H), 3.85 (s, 3H). <sup>13</sup>C NMR (125 MHz, CDCl<sub>3</sub>) δ 159.1, 151.2, 145.8, 133.6, 131.5, 128.4, 127.7, 125.1, 125.6, 114.7, 87.7, 55.6. HRMS (ESI) m/z: [M + H]<sup>+</sup> Calcd for C<sub>16</sub>H<sub>16</sub>N<sub>3</sub>O 266.1288; Found 266.1292.

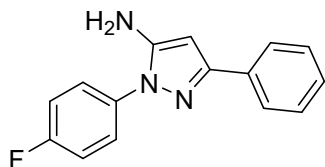

**1-(4-fluorophenyl)-3-phenyl-1H-pyrazol-5-amine (5f):** White solid (60.7 mg, 80%). mp: 134-136 °C. Column chromatography on silica gel (Eluent: petroleum ether/ethyl acetate, 5/1). <sup>1</sup>H NMR (500 MHz, CDCl<sub>3</sub>) δ 7.80 (d, *J* = 7.5 Hz, 2H), 7.61-7.58 (m, 2H), 7.39 (t, *J* = 8.0 Hz, 2H), 7.31 (t, *J* = 7.5 Hz, 1H), 7.17 (t, *J* = 8.5 Hz, 2H), 5.93 (s, 1H), 3.80 (br, 2H). <sup>13</sup>C NMR (125 MHz, CDCl<sub>3</sub>) δ 161.7 (C-F, <sup>1</sup>*J*<sub>C-F</sub> = 246.3 Hz), 151.6,

145.9, 134.8 (C-F,  $^4J_{C-F} = 3.8$  Hz), 133.4, 128.5, 127.9, 125.2 (C-F,  $^2J_{C-F} = 8.8$  Hz), 125.6, 116.3 (C-F,  $^2J_{C-F} = 22.5$  Hz), 88.3. **HRMS (ESI)**  $m/z$ :  $[M + H]^+$  Calcd for  $C_{15}H_{13}FN_3$  254.1088; Found 254.1084.

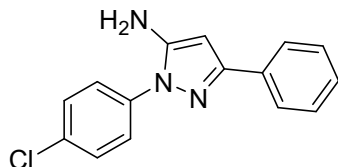

**1-(4-chlorophenyl)-3-phenyl-1H-pyrazol-5-amine (5g)**: White solid (44.4 mg, 55%). mp: 141-143 °C. Column chromatography on silica gel (Eluent: petroleum ether/ethyl acetate, 5/1).  $^1H$  NMR (500 MHz,  $CDCl_3$ )  $\delta$  7.80 (d,  $J = 7.5$  Hz, 2H), 7.61 (d,  $J = 8.5$  Hz, 2H), 7.46 (d,  $J = 8.5$  Hz, 2H), 7.39 (t,  $J = 7.5$  Hz, 2H), 7.31 (t,  $J = 7.5$  Hz, 1H), 5.97 (s, 1H), 3.82 (br, 2H).  $^{13}C$  NMR (125 MHz,  $CDCl_3$ )  $\delta$  151.8, 145.9, 137.3, 133.3, 133.0, 129.6, 128.6, 128.0, 125.6, 125.1, 88.7. **HRMS (ESI)**  $m/z$ :  $[M + H]^+$  Calcd for  $C_{15}H_{13}ClN_3$  270.0793; Found 270.0791.

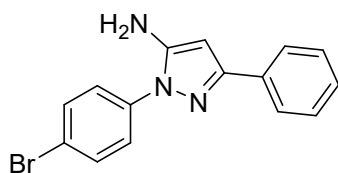

**1-(4-bromophenyl)-3-phenyl-1H-pyrazol-5-amine (5h)**: White solid (60.1 mg, 64%). mp: 157-158 °C. Column chromatography on silica gel (Eluent: petroleum ether/ethyl acetate, 5/1).  $^1H$  NMR (500 MHz,  $CDCl_3$ )  $\delta$  7.79 (d,  $J = 7.5$  Hz, 2H), 7.60 (d,  $J = 8.5$  Hz, 2H), 7.54 (d,  $J = 8.5$  Hz, 2H), 7.39 (t,  $J = 7.5$  Hz, 2H), 7.32 (t,  $J = 7.5$  Hz, 1H), 5.94 (s, 1H), 3.81 (br, 2H).  $^{13}C$  NMR (125 MHz,  $CDCl_3$ )  $\delta$  151.9, 145.8, 137.9, 133.3, 132.6, 128.5, 128.0, 125.7, 125.4, 120.8, 88.9. **HRMS (ESI)**  $m/z$ :  $[M + H]^+$  Calcd for  $C_{15}H_{13}BrN_3$  314.0287; Found 314.0276.

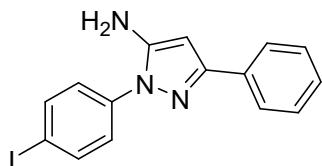

**1-(4-iodophenyl)-3-phenyl-1H-pyrazol-5-amine (5i)**: White solid (58.5 mg, 54%). mp: 177-178 °C. Column chromatography on silica gel (Eluent: petroleum ether/ethyl acetate, 5/1).  $^1H$  NMR (500 MHz,  $CDCl_3$ )  $\delta$  7.81-7.79 (m, 4H), 7.44-7.38 (m, 4H), 7.31

(t,  $J = 7.5$  Hz, 1H), 5.96 (s, 1H), 3.81 (br, 2H).  $^{13}\text{C}$  NMR (125 MHz,  $\text{CDCl}_3$ )  $\delta$  151.9, 145.8, 138.6, 133.2, 128.5, 128.0, 125.7, 125.5, 91.9, 88.9. **HRMS (ESI)**  $m/z$ :  $[\text{M} + \text{H}]^+$  Calcd for  $\text{C}_{15}\text{H}_{13}\text{IN}_3$  362.0149; Found 362.0134.

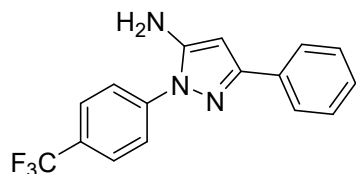

**3-phenyl-1-(4-(trifluoromethyl)phenyl)-1H-pyrazol-5-amine (5j):** White solid (54.5 mg, 60%). mp: 171-172 °C. Column chromatography on silica gel (Eluent: petroleum ether/ethyl acetate, 5/1).  $^1\text{H}$  NMR (500 MHz,  $\text{CDCl}_3$ )  $\delta$  7.85-7.81 (m, 4H), 7.74 (d,  $J = 8.5$  Hz, 2H), 7.41 (t,  $J = 7.5$  Hz, 2H), 7.34 (t,  $J = 7.5$  Hz, 1H), 5.98 (s, 1H), 3.88 (br, 2H).  $^{13}\text{C}$  NMR (125 MHz,  $\text{CDCl}_3$ )  $\delta$  152.3, 146.0, 141.8, 133.1, 128.8 (C-F,  $^2J_{\text{C-F}} = 33.8$  Hz), 128.6, 128.2, 125.6 (C-F,  $^3J_{\text{C-F}} = 3.8$  Hz), 125.7, 123.9 (C-F,  $^1J_{\text{C-F}} = 270.0$  Hz), 123.3, 89.5. **HRMS (ESI)**  $m/z$ :  $[\text{M} + \text{H}]^+$  Calcd for  $\text{C}_{16}\text{H}_{13}\text{F}_3\text{N}_3$  304.1056; Found 304.1057.

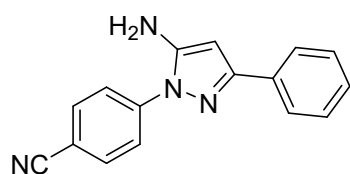

**4-(5-amino-3-phenyl-1H-pyrazol-1-yl)benzotrile (5k):** White solid (50.7 mg, 65%). mp: 168-170 °C. Column chromatography on silica gel (Eluent: petroleum ether/ethyl acetate, 5/1).  $^1\text{H}$  NMR (500 MHz,  $\text{CDCl}_3$ )  $\delta$  7.90 (d,  $J = 8.5$  Hz, 2H), 7.80 (d,  $J = 7.5$  Hz, 2H), 7.76 (d,  $J = 9.0$  Hz, 2H), 7.41 (t,  $J = 7.5$  Hz, 2H), 7.34 (t,  $J = 7.5$  Hz, 1H), 6.02 (s, 1H), 3.91 (br, 2H).  $^{13}\text{C}$  NMR (125 MHz,  $\text{CDCl}_3$ )  $\delta$  152.7, 146.1, 142.7, 133.4, 132.8, 128.6, 128.4, 125.7, 123.0, 118.4, 109.9, 90.4. **HRMS (ESI)**  $m/z$ :  $[\text{M} + \text{H}]^+$  Calcd for  $\text{C}_{16}\text{H}_{13}\text{N}_4$  261.1135; Found 261.1135.

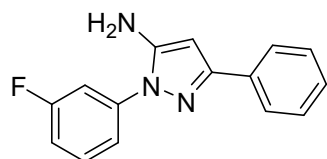

**1-(3-fluorophenyl)-3-phenyl-1H-pyrazol-5-amine (5l):** White solid (61.5 mg, 81%). mp: 98-99 °C. Column chromatography on silica gel (Eluent: petroleum ether/ethyl



acetate, 5/1). **<sup>1</sup>H NMR** (400 MHz, CDCl<sub>3</sub>) δ 7.81 (d, *J* = 7.2 Hz, 2H), 7.46-7.38 (m, 5H), 7.32 (t, *J* = 7.2 Hz, 1H), 7.05 (t, *J* = 7.6 Hz, 1H), 5.96 (s, 1H), 3.89 (br, 2H). **<sup>13</sup>C NMR** (101 MHz, CDCl<sub>3</sub>) δ 163.1 (C-F, <sup>1</sup>*J*<sub>C-F</sub> = 246.3 Hz), 151.9, 145.9, 140.2 (C-F, <sup>3</sup>*J*<sub>C-F</sub> = 10.0 Hz), 133.2, 130.7 (C-F, <sup>3</sup>*J*<sub>C-F</sub> = 10.0 Hz), 128.6, 128.1, 125.7, 119.0 (C-F, <sup>4</sup>*J*<sub>C-F</sub> = 3.8 Hz), 114.1 (C-F, <sup>2</sup>*J*<sub>C-F</sub> = 21.3 Hz), 111.3 (C-F, <sup>2</sup>*J*<sub>C-F</sub> = 25.0 Hz), 88.8. **HRMS (ESI)** m/z: [M + H]<sup>+</sup> Calcd for C<sub>15</sub>H<sub>13</sub>FN<sub>3</sub> 254.1088; Found 254.1093.

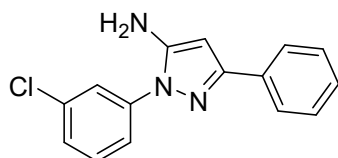

**1-(3-chlorophenyl)-3-phenyl-1H-pyrazol-5-amine (5m):** White solid (58.1 mg, 72%). mp: 135-137 °C. Column chromatography on silica gel (Eluent: petroleum ether/ethyl acetate, 5/1). **<sup>1</sup>H NMR** (500 MHz, CDCl<sub>3</sub>) δ 7.81 (d, *J* = 7.5 Hz, 2H), 7.72 (s, 1H), 7.56 (d, *J* = 8.0 Hz, 1H), 7.42-7.38 (m, 3H), 7.33-7.32 (m, 2H), 5.95 (s, 1H), 3.87 (br, 2H). **<sup>13</sup>C NMR** (125 MHz, CDCl<sub>3</sub>) δ 152.0, 145.9, 139.9, 135.2, 133.2, 130.4, 128.5, 128.1, 127.3, 125.7, 124.1, 121.6, 88.9. **HRMS (ESI)** m/z: [M + H]<sup>+</sup> Calcd for C<sub>15</sub>H<sub>13</sub>ClN<sub>3</sub> 270.0793; Found 270.0785.

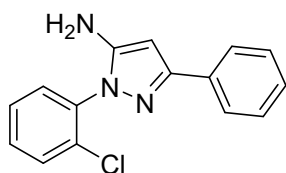

**1-(2-chlorophenyl)-3-phenyl-1H-pyrazol-5-amine (5n):** White solid (53.3 mg, 66%). mp: 103-105 °C. Column chromatography on silica gel (Eluent: petroleum ether/ethyl acetate, 5/1). **<sup>1</sup>H NMR** (500 MHz, CDCl<sub>3</sub>) δ 7.81 (d, *J* = 7.5 Hz, 2H), 7.55-7.53 (m, 2H), 7.42-7.37 (m, 4H), 7.30 (t, *J* = 7.5 Hz, 1H), 5.96 (s, 1H), 3.70 (br, 2H). **<sup>13</sup>C NMR** (125 MHz, CDCl<sub>3</sub>) δ 152.2, 147.1, 135.9, 133.4, 132.3, 130.6, 130.5, 130.4, 128.5, 128.0, 127.9, 125.7, 87.7. **HRMS (ESI)** m/z: [M + H]<sup>+</sup> Calcd for C<sub>15</sub>H<sub>13</sub>ClN<sub>3</sub> 270.0793; Found 270.0794. Spectroscopic data for the title compound were consistent with those reported in the literature.<sup>3</sup>

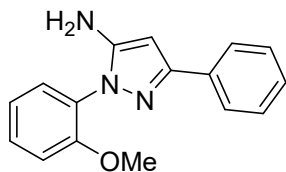

**1-(2-methoxyphenyl)-3-phenyl-1H-pyrazol-5-amine (5o):** White solid (39.8 mg, 50%). mp: 146-148 °C. Column chromatography on silica gel (Eluent: petroleum ether/ethyl acetate, 5/1). <sup>1</sup>H NMR (500 MHz, CDCl<sub>3</sub>) δ 7.82 (d, *J* = 8.0 Hz, 2H), 7.53 (d, *J* = 8.0 Hz, 1H), 7.40-7.36 (m, 3H), 7.29 (t, *J* = 7.0 Hz, 1H), 7.10 (t, *J* = 7.5 Hz, 1H), 7.05 (d, *J* = 8.0 Hz, 1H), 5.94 (s, 1H), 3.87 (br, 2H), 3.84 (s, 3H). <sup>13</sup>C NMR (125 MHz, CDCl<sub>3</sub>) δ 153.6, 152.0, 147.6, 133.9, 129.8, 129.3, 128.4, 128.0, 127.6, 125.7, 121.8, 112.8, 87.9, 56.4. **HRMS (ESI)** *m/z*: [M + H]<sup>+</sup> Calcd for C<sub>16</sub>H<sub>16</sub>N<sub>3</sub>O 266.1288; Found 266.1290.

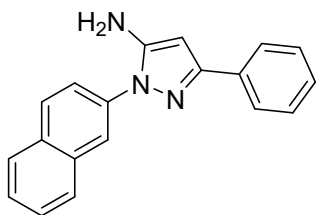

**1-(naphthalen-2-yl)-3-phenyl-1H-pyrazol-5-amine (5p):** White solid (60.7 mg, 71%). mp: 133-135 °C. Column chromatography on silica gel (Eluent: petroleum ether/ethyl acetate, 5/1). <sup>1</sup>H NMR (500 MHz, CDCl<sub>3</sub>) δ 8.03 (s, 1H), 7.94 (d, *J* = 8.5 Hz, 1H), 7.87-7.82 (m, 4H), 7.78 (d, *J* = 8.5 Hz, 1H), 7.53-7.50 (m, 2H), 7.38 (t, *J* = 7.5 Hz, 2H), 7.30 (t, *J* = 7.5 Hz, 1H), 5.96 (s, 1H), 3.90 (br, 2H). <sup>13</sup>C NMR (125 MHz, CDCl<sub>3</sub>) δ 151.8, 146.2, 136.1, 133.5, 133.4, 132.2, 129.7, 128.6, 128.1, 127.9, 127.9, 125.9, 125.5, 125.7, 122.8, 121.7, 88.3. **HRMS (ESI)** *m/z*: [M + H]<sup>+</sup> Calcd for C<sub>19</sub>H<sub>16</sub>N<sub>3</sub> 286.1339; Found 286.1325.

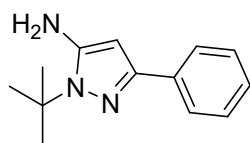

**1-(tert-butyl)-3-phenyl-1H-pyrazol-5-amine (5q):** White solid (17.4 mg, 27%). mp: 102-104 °C. Column chromatography on silica gel (Eluent: petroleum ether/ethyl acetate, 5/1). <sup>1</sup>H NMR (500 MHz, CDCl<sub>3</sub>) δ 7.75 (d, *J* = 7.0 Hz, 2H), 7.35 (t, *J* = 7.5 Hz, 2H), 7.24 (t, *J* = 7.5 Hz, 1H), 5.90 (s, 1H), 3.58 (br, 2H), 1.69 (s, 9H). <sup>13</sup>C NMR

(125 MHz, CDCl<sub>3</sub>)  $\delta$  147.6, 145.4, 134.3, 128.4, 127.1, 125.3, 91.4, 58.9, 29.4. **HRMS (ESI)**  $m/z$ : [M + H]<sup>+</sup> Calcd for C<sub>13</sub>H<sub>18</sub>N<sub>3</sub> 216.1495; Found 216.1506.

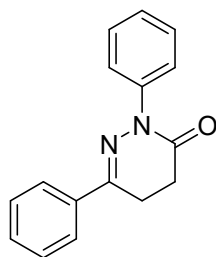

**2,6-diphenyl-4,5-dihydropyridazin-3(2H)-one (7a)**: off white solid (41.3 mg, 55%). mp: 96-98 °C. Column chromatography on silica gel (Eluent: petroleum ether/ethyl acetate, 4/1). **<sup>1</sup>H NMR** (400 MHz, CDCl<sub>3</sub>)  $\delta$  7.81-7.78 (m, 2H), 7.60 (d,  $J$  = 8.0 Hz, 2H), 7.43-7.39 (m, 5H), 7.27 (t,  $J$  = 7.6 Hz, 1H), 3.07 (t,  $J$  = 8.0 Hz, 2H), 2.77 (t,  $J$  = 8.0 Hz, 2H). **<sup>13</sup>C NMR** (101 MHz, CDCl<sub>3</sub>)  $\delta$  165.4, 151.6, 141.3, 135.5, 130.1, 128.7, 128.6, 125.7, 125.1, 125.0, 28.1, 22.9. **HRMS (ESI)**  $m/z$ : [M + H]<sup>+</sup> Calcd for C<sub>16</sub>H<sub>15</sub>N<sub>2</sub>O 251.1179; Found 251.1170. Spectroscopic data for the title compound were consistent with those reported in the literature.<sup>4</sup>

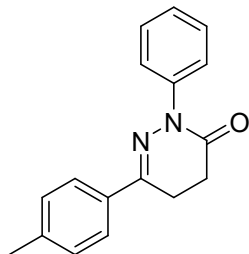

**2-phenyl-6-(*p*-tolyl)-4,5-dihydropyridazin-3(2H)-one (7b)**: red oil (33.3 mg, 42%). Column chromatography on silica gel (Eluent: petroleum ether/ethyl acetate, 4/1). **<sup>1</sup>H NMR** (500 MHz, CDCl<sub>3</sub>)  $\delta$  7.69 (d,  $J$  = 8.5 Hz, 2H), 7.60 (d,  $J$  = 8.0 Hz, 2H), 7.41 (t,  $J$  = 8.0 Hz, 2H), 7.28-7.21 (m, 3H), 3.05 (t,  $J$  = 8.0 Hz, 2H), 2.75 (t,  $J$  = 8.0 Hz, 2H), 2.38 (s, 3H). **<sup>13</sup>C NMR** (125 MHz, CDCl<sub>3</sub>)  $\delta$  165.4, 151.7, 141.4, 140.3, 132.7, 129.4, 128.5, 125.5, 125.1, 124.9, 28.1, 22.9, 21.4. **HRMS (ESI)**  $m/z$ : [M + Na]<sup>+</sup> Calcd for C<sub>17</sub>H<sub>16</sub>N<sub>2</sub>NaO 287.1155; Found 287.1169. Spectroscopic data for the title compound were consistent with those reported in the literature.<sup>4</sup>

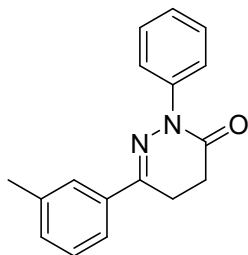

**2-phenyl-6-(*m*-tolyl)-4,5-dihydropyridazin-3(2H)-one (7c):** red oil (38.0 mg, 48%). Column chromatography on silica gel (Eluent: petroleum ether/ethyl acetate, 4/1). **<sup>1</sup>H NMR** (500 MHz, CDCl<sub>3</sub>) δ 7.62-7.57 (m, 4H), 7.42 (t, *J* = 8.0 Hz, 2H), 7.31-7.21 (m, 3H), 3.06 (t, *J* = 8.0 Hz, 2H), 2.76 (t, *J* = 8.0 Hz, 2H), 2.39 (s, 3H). **<sup>13</sup>C NMR** (125 MHz, CDCl<sub>3</sub>) δ 165.4, 151.9, 141.3, 138.4, 135.5, 130.8, 128.5, 125.7, 125.6, 125.0, 123.3, 28.1, 23.0, 21.5. **HRMS (ESI)** *m/z*: [M + Na]<sup>+</sup> Calcd for C<sub>17</sub>H<sub>16</sub>N<sub>2</sub>NaO 287.1155; Found 287.1160.

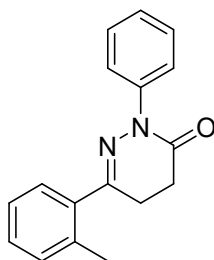

**2-phenyl-6-(*o*-tolyl)-4,5-dihydropyridazin-3(2H)-one (7d):** red oil (19.8 mg, 25%). Column chromatography on silica gel (Eluent: petroleum ether/ethyl acetate, 4/1). **<sup>1</sup>H NMR** (500 MHz, CDCl<sub>3</sub>) δ 7.56 (d, *J* = 8.0 Hz, 2H), 7.41-7.36 (m, 3H), 7.30-7.25 (m, 4H), 3.00 (t, *J* = 8.0 Hz, 2H), 2.78 (t, *J* = 8.0 Hz, 2H), 2.48 (s, 3H). **<sup>13</sup>C NMR** (125 MHz, CDCl<sub>3</sub>) δ 165.3, 155.2, 141.1, 136.5, 135.8, 131.3, 129.2, 128.5, 128.0, 125.6, 125.0, 124.9, 28.3, 26.6, 21.1. **HRMS (ESI)** *m/z*: [M + Na]<sup>+</sup> Calcd for C<sub>17</sub>H<sub>16</sub>N<sub>2</sub>NaO 287.1155; Found 287.1157.

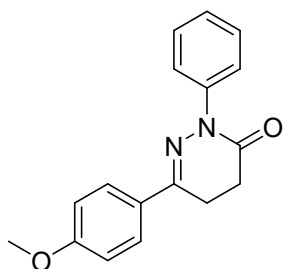

**6-(4-methoxyphenyl)-2-phenyl-4,5-dihydropyridazin-3(2H)-one (7e):** red oil (26.1 mg, 31%). Column chromatography on silica gel (Eluent: petroleum ether/ethyl acetate,

4/1).  $^1\text{H NMR}$  (500 MHz,  $\text{CDCl}_3$ )  $\delta$  7.75 (d,  $J = 9.0$  Hz, 2H), 7.60 (d,  $J = 8.0$  Hz, 2H), 7.41 (t,  $J = 8.0$  Hz, 2H), 7.26 (t,  $J = 7.0$  Hz, 1H), 6.92 (d,  $J = 9.0$  Hz, 2H), 3.83 (s, 3H), 3.04 (t,  $J = 8.0$  Hz, 2H), 2.75 (t,  $J = 8.0$  Hz, 2H).  $^{13}\text{C NMR}$  (125 MHz,  $\text{CDCl}_3$ )  $\delta$  165.4, 161.2, 151.4, 141.4, 128.5, 128.0, 127.7, 125.5, 124.9, 114.0, 55.4, 28.1, 22.8. **HRMS (ESI)**  $m/z$ :  $[\text{M} + \text{H}]^+$  Calcd for  $\text{C}_{17}\text{H}_{17}\text{N}_2\text{O}_2$  281.1285; Found 281.1279.

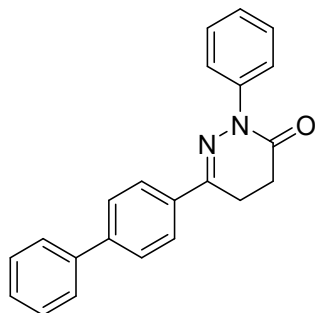

**6-([1,1'-biphenyl]-4-yl)-2-phenyl-4,5-dihydropyridazin-3(2H)-one (7f)**: light brown solid (58.7 mg, 60%). mp: 123-125 °C. Column chromatography on silica gel (Eluent: petroleum ether/ethyl acetate, 4/1).  $^1\text{H NMR}$  (500 MHz,  $\text{CDCl}_3$ )  $\delta$  7.86 (d,  $J = 8.5$  Hz, 2H), 7.64-7.60 (m, 6H), 7.46-7.35 (m, 4H), 7.36 (t,  $J = 7.5$  Hz, 1H), 7.27 (t,  $J = 7.5$  Hz, 1H), 3.07 (t,  $J = 8.0$  Hz, 2H), 2.77 (t,  $J = 8.0$  Hz, 2H).  $^{13}\text{C NMR}$  (125 MHz,  $\text{CDCl}_3$ )  $\delta$  165.3, 151.2, 142.7, 141.3, 140.2, 134.4, 129.0, 128.6, 127.9, 127.3, 127.1, 125.6, 125.6, 124.9, 28.1, 22.9. **HRMS (ESI)**  $m/z$ :  $[\text{M} + \text{H}]^+$  Calcd for  $\text{C}_{22}\text{H}_{19}\text{N}_2\text{O}$  327.1492; Found 327.1501.

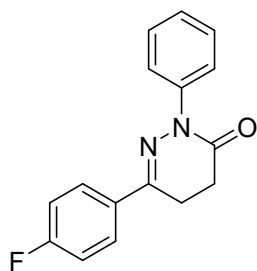

**6-(4-fluorophenyl)-2-phenyl-4,5-dihydropyridazin-3(2H)-one (7g)**: light green oil (41.8 mg, 52%). Column chromatography on silica gel (Eluent: petroleum ether/ethyl acetate, 4/1).  $^1\text{H NMR}$  (500 MHz,  $\text{CDCl}_3$ )  $\delta$  7.80-7.77 (m, 2H), 7.59-7.57 (m, 2H), 7.43-7.40 (m, 2H), 7.29-7.25 (m, 1H), 7.11-7.08 (m, 2H), 3.05 (t,  $J = 8.0$  Hz, 2H), 2.77(t,  $J = 8.0$  Hz, 2H).  $^{13}\text{C NMR}$  (125 MHz,  $\text{CDCl}_3$ )  $\delta$  165.1, 163.9 (C-F,  $^1J_{\text{C-F}} = 248.8$  Hz), 150.5, 141.2, 131.7 (C-F,  $^4J_{\text{C-F}} = 2.5$  Hz), 128.6, 128.1 (C-F,  $^3J_{\text{C-F}} = 8.8$  Hz), 125.7, 124.9, 115.7 (C-F,  $^2J_{\text{C-F}} = 21.2$  Hz), 28.0, 22.9. **HRMS (ESI)**  $m/z$ :  $[\text{M} + \text{H}]^+$  Calcd for

C<sub>16</sub>H<sub>14</sub>FN<sub>2</sub>O 269.1085; Found 269.1092.

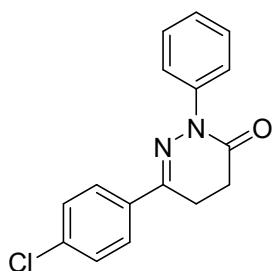

**6-(4-chlorophenyl)-2-phenyl-4,5-dihydropyridazin-3(2H)-one (7h):** light yellow oil (56.2 mg, 66%). Column chromatography on silica gel (Eluent: petroleum ether/ethyl acetate, 4/1). **<sup>1</sup>H NMR** (500 MHz, CDCl<sub>3</sub>) δ 7.74 (d, *J* = 8.5 Hz, 2H), 7.57 (d, *J* = 8.0 Hz, 2H), 7.44- 7.38 (m, 4H), 7.28 (t, *J* = 7.5 Hz, 1H), 3.07 (t, *J* = 8.0 Hz, 2H), 2.79 (t, *J* = 8.0 Hz, 2H). **<sup>13</sup>C NMR** (125 MHz, CDCl<sub>3</sub>) δ 165.1, 150.2, 141.1, 136.1, 133.9, 128.9, 128.6, 127.4, 125.7, 124.9, 27.9, 22.8. **HRMS (ESI)** *m/z*: [M + H]<sup>+</sup> Calcd for C<sub>16</sub>H<sub>14</sub>ClN<sub>2</sub>O 285.0789; Found 285.0791. Spectroscopic data for the title compound were consistent with those reported in the literature.<sup>4</sup>

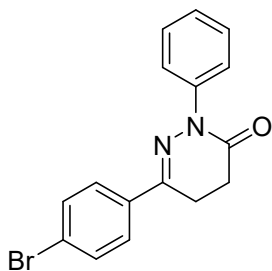

**6-(4-bromophenyl)-2-phenyl-4,5-dihydropyridazin-3(2H)-one (7i):** light yellow oil (68.9 mg, 70%). Column chromatography on silica gel (Eluent: petroleum ether/ethyl acetate, 4/1). **<sup>1</sup>H NMR** (500 MHz, CDCl<sub>3</sub>) δ 7.65 (d, *J* = 9.0 Hz, 2H), 7.57-7.52 (m, 4H), 7.41 (t, *J* = 8.0 Hz, 2H), 7.27 (t, *J* = 7.5 Hz, 1H), 3.03 (t, *J* = 8.0 Hz, 2H), 2.76 (t, *J* = 8.0 Hz, 2H). **<sup>13</sup>C NMR** (125 MHz, CDCl<sub>3</sub>) δ 165.1, 150.3, 141.2, 134.4, 131.8, 128.6, 127.6, 125.7, 124.9, 124.4, 27.9, 22.7. **HRMS (ESI)** *m/z*: [M + H]<sup>+</sup> Calcd for C<sub>16</sub>H<sub>14</sub>BrN<sub>2</sub>O 329.0284; Found 329.0296.

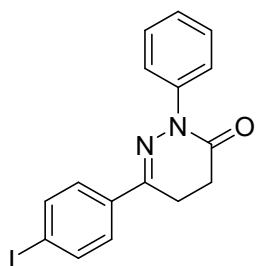

**6-(4-iodophenyl)-2-phenyl-4,5-dihydropyridazin-3(2H)-one (7j):** brown solid (67.7 mg, 60%). mp: 98-100 °C. Column chromatography on silica gel (Eluent: petroleum ether/ethyl acetate, 4/1). <sup>1</sup>H NMR (400 MHz, CDCl<sub>3</sub>) δ 7.73 (d, *J* = 8.0 Hz, 2H), 7.57-7.50 (m, 4H), 7.41 (t, *J* = 7.6 Hz, 2H), 7.27 (t, *J* = 7.6 Hz, 1H), 3.02 (t, *J* = 8.0 Hz, 2H), 2.76 (t, *J* = 8.0 Hz, 2H). <sup>13</sup>C NMR (101 MHz, CDCl<sub>3</sub>) δ 165.1, 150.4, 141.2, 137.8, 135.0, 128.6, 127.7, 125.7, 124.9, 96.4, 27.9, 22.6. HRMS (ESI) *m/z*: [M + H]<sup>+</sup> Calcd for C<sub>16</sub>H<sub>14</sub>IN<sub>2</sub>O 377.0145; Found 377.0133.

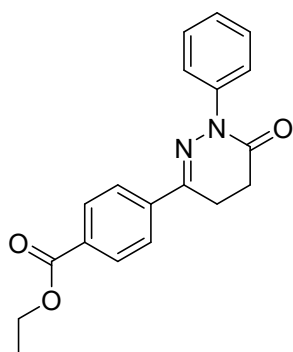

**ethyl 4-(6-oxo-1-phenyl-1,4,5,6-tetrahydropyridazin-3-yl)benzoate (7k):** light brown solid (73.4 mg, 76%). mp: 59-60 °C. Column chromatography on silica gel (Eluent: petroleum ether/ethyl acetate, 4/1). <sup>1</sup>H NMR (500 MHz, CDCl<sub>3</sub>) δ 8.08 (d, *J* = 8.5 Hz, 2H), 7.86 (d, *J* = 8.5 Hz, 2H), 7.58 (d, *J* = 7.5 Hz, 2H), 7.44 (t, *J* = 7.5 Hz, 2H), 7.30 (t, *J* = 7.5 Hz, 1H), 4.40 (q, *J* = 7.0 Hz, 2H), 3.13 (t, *J* = 8.0 Hz, 2H), 2.82 (t, *J* = 8.0 Hz, 2H), 1.41 (t, *J* = 7.0 Hz, 3H). <sup>13</sup>C NMR (125 MHz, CDCl<sub>3</sub>) δ 166.1, 165.1, 150.2, 141.1, 139.4, 131.5, 129.8, 128.6, 125.8, 125.9, 124.9, 61.2, 27.9, 22.9, 14.3. HRMS (ESI) *m/z*: [M + H]<sup>+</sup> Calcd for C<sub>19</sub>H<sub>19</sub>N<sub>2</sub>O<sub>3</sub> 323.1390; Found 323.1388.

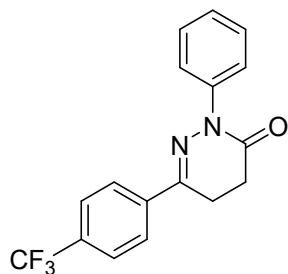

**2-phenyl-6-(4-(trifluoromethyl)phenyl)-4,5-dihydropyridazin-3(2H)-one (7l):** brown solid (72.5 mg, 76%). mp: 79-81 °C. Column chromatography on silica gel (Eluent: petroleum ether/ethyl acetate, 4/1). <sup>1</sup>H NMR (500 MHz, CDCl<sub>3</sub>) δ 7.91 (d, *J* = 8.0 Hz, 2H), 7.67 (d, *J* = 8.0 Hz, 2H), 7.57 (d, *J* = 8.0 Hz, 2H), 7.43 (t, *J* = 7.5

Hz, 2H), 7.30 (t,  $J = 7.5$  Hz, 1H), 3.12 (t,  $J = 8.0$  Hz, 2H), 2.82 (t,  $J = 8.0$  Hz, 2H).  $^{13}\text{C}$  NMR (125 MHz,  $\text{CDCl}_3$ )  $\delta$  165.0, 149.7, 141.1, 138.8, 131.6 (C-F,  $^2J_{\text{C-F}} = 32.8$  Hz), 128.6, 125.9, 125.4, 125.6 (C-F,  $^3J_{\text{C-F}} = 3.8$  Hz), 124.9, 123.9 (C-F,  $^1J_{\text{C-F}} = 272.2$  Hz), 27.8, 22.9. **HRMS (ESI)**  $m/z$ :  $[\text{M} + \text{H}]^+$  Calcd for  $\text{C}_{17}\text{H}_{14}\text{F}_3\text{N}_2\text{O}$  319.1053; Found 319.1053.

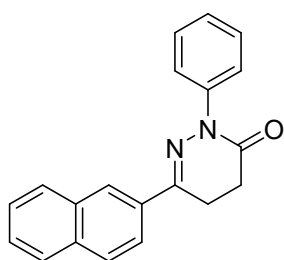

**6-(naphthalen-2-yl)-2-phenyl-4,5-dihydropyridazin-3(2H)-one (7m)**: light yellow oil (28.8 mg, 32%). Column chromatography on silica gel (Eluent: petroleum ether/ethyl acetate, 4/1).  $^1\text{H}$  NMR (500 MHz,  $\text{CDCl}_3$ )  $\delta$  8.12-8.07 (m, 2H), 7.89-7.84 (m, 3H), 7.64 (d,  $J = 7.5$  Hz, 2H), 7.53-7.43 (m, 4H), 7.29 (t,  $J = 7.5$  Hz, 1H), 3.21 (t,  $J = 8.0$  Hz, 2H), 2.83 (t,  $J = 8.0$  Hz, 2H).  $^{13}\text{C}$  NMR (125 MHz,  $\text{CDCl}_3$ )  $\delta$  165.4, 151.3, 141.3, 134.0, 133.0, 132.9, 128.6, 128.6, 128.4, 127.8, 127.2, 125.7, 125.2, 125.0, 123.2, 28.1, 22.8. **HRMS (ESI)**  $m/z$ :  $[\text{M} + \text{H}]^+$  Calcd for  $\text{C}_{20}\text{H}_{17}\text{N}_2\text{O}$  301.1335; Found 301.1344.

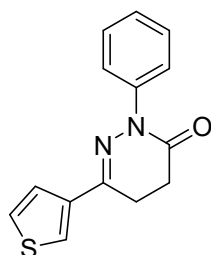

**2-phenyl-6-(thiophen-3-yl)-4,5-dihydropyridazin-3(2H)-one (7n)**: red oil (23.1 mg, 30%). Column chromatography on silica gel (Eluent: petroleum ether/ethyl acetate, 4/1).  $^1\text{H}$  NMR (500 MHz,  $\text{CDCl}_3$ )  $\delta$  7.59-7.57 (m, 4H), 7.42 (t,  $J = 8.0$  Hz, 2H), 7.35-7.34 (m, 1H), 7.28 (d,  $J = 7.5$  Hz, 1H), 3.06 (t,  $J = 8.0$  Hz, 2H), 2.78 (t,  $J = 8.0$  Hz, 2H).  $^{13}\text{C}$  NMR (125 MHz,  $\text{CDCl}_3$ )  $\delta$  165.2, 148.2, 141.2, 138.6, 128.5, 125.6, 125.6, 125.7, 125.0, 124.9, 28.1, 23.7. **HRMS (ESI)**  $m/z$ :  $[\text{M} + \text{H}]^+$  Calcd for  $\text{C}_{14}\text{H}_{13}\text{N}_2\text{OS}$  257.0743; Found 257.0755.



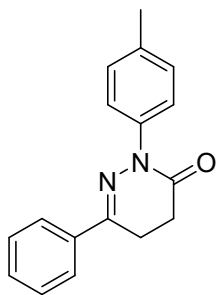

**6-phenyl-2-(*p*-tolyl)-4,5-dihydropyridazin-3(2*H*)-one (7o):** off white solid (22.2 mg, 28%). mp: 116-118 °C. Column chromatography on silica gel (Eluent: petroleum ether/ethyl acetate, 4/1). **<sup>1</sup>H NMR** (500 MHz, CDCl<sub>3</sub>) δ 7.80-7.79 (m, 2H), 7.45 (d, *J* = 8.5 Hz, 2H), 7.42-7.40 (m, 3H), 7.22 (d, *J* = 8.5 Hz, 2H), 3.08 (t, *J* = 8.0 Hz, 2H), 2.77 (t, *J* = 8.0 Hz, 2H), 2.37 (s, 3H). **<sup>13</sup>C NMR** (125 MHz, CDCl<sub>3</sub>) δ 165.3, 151.3, 138.8, 136.5, 135.5, 129.9, 129.2, 128.6, 125.1, 124.9, 28.0, 22.9, 21.1. **HRMS (ESI)** *m/z*: [M + Na]<sup>+</sup> Calcd for C<sub>17</sub>H<sub>16</sub>N<sub>2</sub>NaO 287.1155; Found 287.1159.

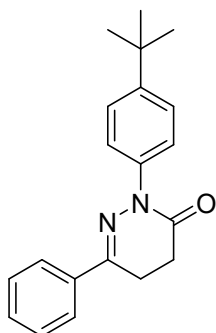

**2-(4-(*tert*-butyl)phenyl)-6-phenyl-4,5-dihydropyridazin-3(2*H*)-one (7p):** brown solid (20.2 mg, 22%), mp: 133-135 °C. Column chromatography on silica gel (Eluent: petroleum ether/ethyl acetate, 4/1). **<sup>1</sup>H NMR** (500 MHz, CDCl<sub>3</sub>) δ 7.81-7.79 (m, 2H), 7.50 (d, *J* = 9.0 Hz, 2H), 7.45-7.40 (m, 5H), 3.09 (t, *J* = 8.0 Hz, 2H), 2.78 (t, *J* = 8.0 Hz, 2H), 1.34 (s, 9H). **<sup>13</sup>C NMR** (125 MHz, CDCl<sub>3</sub>) δ 165.3, 151.4, 149.5, 138.7, 135.5, 129.9, 128.6, 125.1, 125.5, 124.5, 34.6, 31.4, 28.0, 22.9. **HRMS (ESI)** *m/z*: [M + H]<sup>+</sup> Calcd for C<sub>20</sub>H<sub>23</sub>N<sub>2</sub>O 307.1805; Found 307.1801.

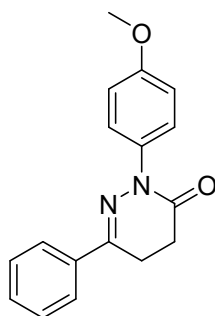

**2-(4-methoxyphenyl)-6-phenyl-4,5-dihydropyridazin-3(2H)-one (7q):** light brown solid (34.5 mg, 41%), mp: 125-128 °C. Column chromatography on silica gel (Eluent: petroleum ether/ethyl acetate, 4/1). <sup>1</sup>H NMR (500 MHz, CDCl<sub>3</sub>) δ 7.80-7.78 (m, 2H), 7.53-7.40 (m, 5H), 6.95-6.93 (m, 2H), 3.82 (s, 3H), 3.08 (t, *J* = 8.0 Hz, 2H), 2.77 (t, *J* = 8.0 Hz, 2H). <sup>13</sup>C NMR (125 MHz, CDCl<sub>3</sub>) δ 165.4, 158.2, 151.4, 135.5, 134.4, 130.0, 128.6, 125.4, 125.1, 113.9, 55.5, 27.9, 22.9. **HRMS (ESI)** *m/z*: [M + H]<sup>+</sup> Calcd for C<sub>17</sub>H<sub>17</sub>N<sub>2</sub>O<sub>2</sub> 281.1285; Found 281.1275.

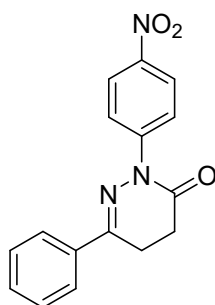

**2-(4-nitrophenyl)-6-phenyl-4,5-dihydropyridazin-3(2H)-one (7r):** yellow solid (23.1 mg, 26%), mp: 110-112 °C. Column chromatography on silica gel (Eluent: petroleum ether/ethyl acetate, 4/1). <sup>1</sup>H NMR (500 MHz, CDCl<sub>3</sub>) δ 8.27 (d, *J* = 9.5 Hz, 2H), 7.95 (d, *J* = 9.5 Hz, 2H), 7.84-7.82 (m, 2H), 7.48-7.47 (m, 3H), 3.14 (t, *J* = 8.0 Hz, 2H), 2.84 (t, *J* = 8.0 Hz, 2H). <sup>13</sup>C NMR (125 MHz, CDCl<sub>3</sub>) δ 165.7, 153.3, 146.3, 144.9, 135.0, 130.6, 128.8, 125.2, 124.0, 123.8, 28.3, 22.9. **HRMS (ESI)** *m/z*: [M + H]<sup>+</sup> Calcd for C<sub>16</sub>H<sub>14</sub>N<sub>3</sub>O<sub>3</sub> 296.1030; Found 296.1034. Spectroscopic data for the title compound were consistent with those reported in the literature.<sup>5</sup>

## 4.Synthetic Applications

### 4.1. Synthesis of tetra-substituted pyrazole

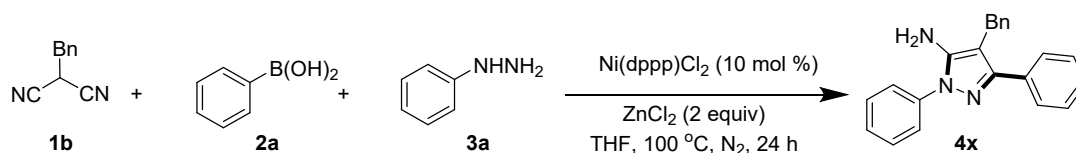

In a 10 mL Schlenk reaction tube, 2-benzylmalononitrile (**1b**) (0.6 mmol, 2.0 equiv, 93.6 mg), phenylboronic acid (**2a**) (0.8 mmol, 2.6 equiv, 97.6 mg), phenylhydrazine or substituted phenylhydrazine hydrochloride (**3a**) (0.3 mmol, 1.0 equiv, 32.4 mg), Ni(dppp)Cl<sub>2</sub> (0.03 mmol, 10 mol %, 16.3 mg), ZnCl<sub>2</sub> (0.6 mmol, 2.0 equiv, 81.8mg), were dissolved in tetrahydrofuran (2.0 mL) under N<sub>2</sub> atmosphere. The reaction mixture was then heated at 100 °C (oil bath) with vigorous stirring for 24 hours. After the reaction equilibrium, the mixture was poured into ethyl acetate, which was washed with saturated NaHCO<sub>3</sub> (2 × 10 mL) and then brine (1 × 10 mL). After the aqueous layer was extracted with ethyl acetate, the combined organic layers were dried over anhydrous Na<sub>2</sub>SO<sub>4</sub> and evaporated under vacuum. The filtrate was concentrated in vacuo and purified by a silica gel packed flash chromatography column with petroleum ether/ethyl acetate (5:1) as the eluent to afford the desired products **4x** in 90% yield.

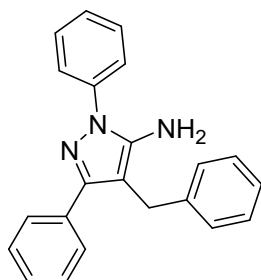

**4-benzyl-1,3-diphenyl-1H-pyrazol-5-amine (4x)**: yellow oil (87.8 mg, 90%). Column chromatography on silica gel (Eluent: petroleum ether/ethyl acetate, 5/1). <sup>1</sup>H NMR (500 MHz, CDCl<sub>3</sub>) δ 7.63 (t, *J* = 8.0 Hz, 4H), 7.46 (t, *J* = 8.0 Hz, 2H), 7.37-7.29 (m, 8H), 7.21 (t, *J* = 7.0 Hz, 1H), 3.93 (s, 2H), 3.53 (s, 2H). <sup>13</sup>C NMR (125 MHz, CDCl<sub>3</sub>) δ 151.4, 143.6, 139.9, 138.8, 133.9, 129.5, 128.8, 128.4, 128.2, 128.0, 127.7, 127.3, 125.3, 124.0, 99.8, 29.4. HRMS (ESI) *m/z*: [M + H]<sup>+</sup> Calcd for C<sub>22</sub>H<sub>20</sub>N<sub>3</sub> 326.1652; Found 326.1657

#### 4.2. Synthesis of biologically active molecule in one pot

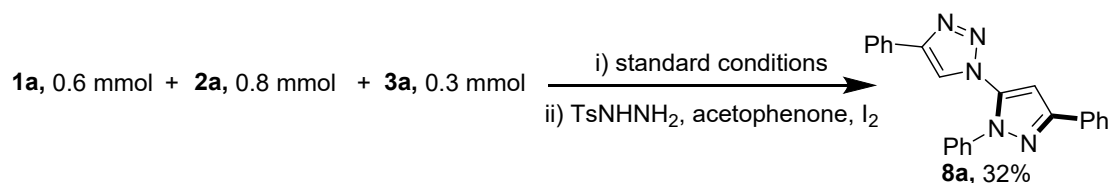

In a 10 mL Schlenk reaction tube, malononitrile (**1a**) (0.6 mmol, 2.0 equiv, 39.6 mg), phenylboronic acid (**2a**) (0.8 mmol, 2.6 equiv, 97.6 mg), phenylhydrazine or substituted phenylhydrazine hydrochloride (**3a**) (0.3 mmol, 1.0 equiv, 32.4 mg), Ni(dppp)Cl<sub>2</sub> (0.03 mmol, 10 mol %, 16.3 mg), ZnCl<sub>2</sub> (0.6 mmol, 2.0 equiv, 81.8 mg), were dissolved in tetrahydrofuran (2.0 mL) under N<sub>2</sub> atmosphere. The reaction mixture was then heated at 100 °C (oil bath) with vigorous stirring for 24 hours. After the mixture was cooled to room temperature, acetophenone (0.25 mmol, 1.0 equiv, 30.1 mg), 4-Methylbenzenesulfonhydrazide (0.375 mmol, 1.5 equiv, 69.8 mg), iodine (0.375 mmol, 1.5 equiv, 95.2 mg) was added to the mixture, The mixture was stirred at 100 °C under air for 12 h. After completion of the reaction (monitored by TLC), the reaction mixture was cooled to ambient temperature and water (30 mL) was added to the mixture, which was then extracted with EtOAc (3 × 10 mL). The extract was washed with 10% w/w Na<sub>2</sub>S<sub>2</sub>O<sub>3</sub> (aq), dried over anhydrous Na<sub>2</sub>SO<sub>4</sub>, and the solvent was removed under vacuum to provide the crude product, which was purified by column chromatography on silica gel to afford the desired products **8a** in 32% yield.<sup>6</sup>

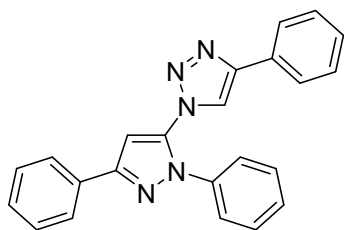

**1-(1,3-diphenyl-1H-pyrazol-5-yl)-4-phenyl-1H-1,2,3-triazole (8a):** light-yellow solid (34.9 mg, 32%), mp: 122-123 °C. Column chromatography on silica gel (Eluent: petroleum ether/ethyl acetate, 5/1). <sup>1</sup>H NMR (500 MHz, CDCl<sub>3</sub>) δ 7.91 (d, *J* = 8.0 Hz, 2H), 7.80-7.78 (m, 3H), 7.46-7.30 (m, 11H), 7.02 (s, 1H). <sup>13</sup>C NMR (125 MHz, CDCl<sub>3</sub>) δ 151.8, 148.1, 137.7, 135.5, 132.1, 129.5, 129.0, 128.9, 128.8, 128.6, 126.0, 125.8, 123.8, 121.8, 102.3. HRMS (ESI) *m/z*: [M + H]<sup>+</sup> Calcd for C<sub>23</sub>H<sub>18</sub>N<sub>5</sub> 364.1557; Found

364.1577. Spectroscopic data for the title compound were consistent with those reported in the literature.<sup>3</sup>

### 4.3. The transformation of amino group

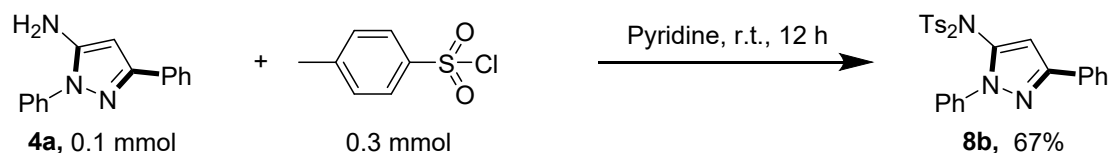

In a 10 mL Schlenk reaction tube, 4-tosyl chloride (0.3 mmol, 3.0 equiv, 57.2 mg) was added to a mixture of 1,3-diphenyl-1*H*-pyrazol-5-amine (**4a**) (0.1 mmol, 1.0 equiv, 23.5 mg) in pyridine (1 mL). The mixture was stirred at room temperature under air for 12 h. After completion of the reaction, water (10 mL) was added to the mixture, which was then extracted with EtOAc (3 × 10 mL). The combined organic layers were dried over anhydrous Na<sub>2</sub>SO<sub>4</sub> and evaporated under vacuum. The filtrate was concentrated in vacuo and purified by a silica gel packed flash chromatography column with petroleum ether/ethyl acetate (8:1) as the eluent to afford the desired products **8b** in 67% yield.

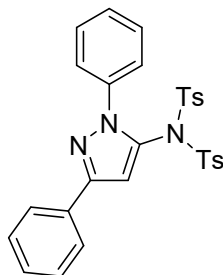

***N*-(1,3-diphenyl-1*H*-pyrazol-5-yl)-4-methyl-*N*-tosylbenzenesulfonamide (8b)**: off white solid (36.4 mg, 67%), mp: 205-207 °C. Column chromatography on silica gel (Eluent: petroleum ether/ethyl acetate, 8/1). <sup>1</sup>H NMR (500 MHz, CDCl<sub>3</sub>) δ 7.77 (d, *J* = 7.5 Hz, 2H), 7.64-7.61 (m, 6H), 7.42-7.34 (m, 6H), 7.23 (d, *J* = 8.0 Hz, 4H), 6.32 (s, 1H), 2.46 (s, 6H). <sup>13</sup>C NMR (125 MHz, CDCl<sub>3</sub>) δ 151.2, 145.7, 138.4, 135.1, 132.6, 132.5, 129.5, 129.3, 129.1, 128.7, 128.4, 128.2, 125.7, 125.6, 105.9, 21.8. HRMS (ESI) *m/z*: [M + H]<sup>+</sup> Calcd for C<sub>29</sub>H<sub>26</sub>N<sub>3</sub>O<sub>4</sub>S<sub>2</sub> 544.1359; Found 544.1348.

### 4.4. The late-stage oxidation of the obtained product<sup>7</sup>

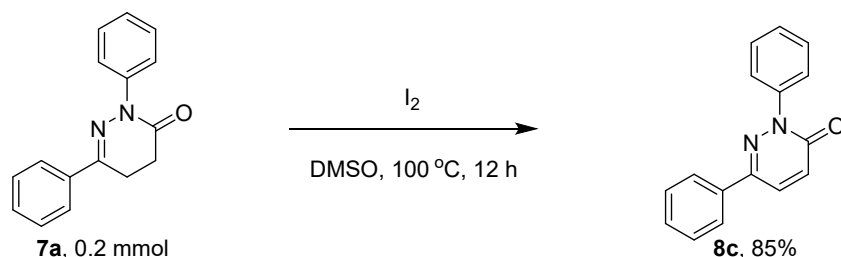

A mixture of 2,6-diphenyl-4,5-dihydropyridazin-3(2H)-one **7a** (0.2 mmol) and iodine (25 mol%) in DMSO was stirred for 8 h at 100 °C. The completion of reaction was monitored by TLC (acetone:hexane = 30:70). The brown-red coloured reaction mixture was poured into saturated solution of sodium thiosulphate. The separated solid product was filtered, dried and recrystallized from methanol. The 2,6-diphenylpyridazin-3(2H)-one **8c** was obtained in 85% yield.

**2,6-diphenylpyridazin-3(2H)-one (8c)**: White solid, (42.2 mg, 85%). Column chromatography on silica gel (Eluent: petroleum ether/ethyl acetate, 2/1). <sup>1</sup>H NMR (500 MHz, CDCl<sub>3</sub>) δ 7.83 (d, *J* = 7.0 Hz, 2H), 7.75 (d, *J* = 9.5 Hz, 1H), 7.71 (d, *J* = 7.5 Hz, 2H), 7.53-7.40 (m, 6H), 7.15 (d, *J* = 9.5 Hz, 1H). <sup>13</sup>C NMR (125 MHz, CDCl<sub>3</sub>) δ 159.5, 144.9, 141.8, 134.5, 131.5, 130.3, 129.7, 129.0, 128.8, 128.3, 126.1, 125.50.

## 5. The Mechanistic Investigations

### 5.1. Competitive experiments

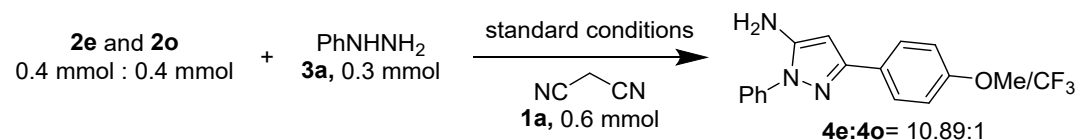

In a 10 mL Schlenk reaction tube, malononitrile (**1a**) (0.6 mmol, 2.0 equiv, 39.6 mg), 4-methoxyphenylboronic acid (**2e**) (0.4 mmol, 1.3 equiv, 60.8 mg), 4-trifluoromethylphenylboronic acid (**2o**) (0.4 mmol, 1.3 equiv, 76.0 mg), phenylhydrazine (**3a**) (0.3 mmol, 1.0 equiv, 32.4 mg), Ni(dppp)Cl<sub>2</sub> (0.03 mmol, 10 mol %, 16.3 mg), ZnCl<sub>2</sub> (0.6 mmol, 2.0 equiv, 81.8 mg), were dissolved in tetrahydrofuran (2.0 mL) under N<sub>2</sub> atmosphere. The reaction mixture was then heated at 100 °C (oil bath) with vigorous stirring for 24 hours. After the reaction equilibrium, the mixture was poured into ethyl acetate, which was washed with saturated NaHCO<sub>3</sub> (2 × 10 mL) and then brine (1 × 10 mL). After the aqueous layer was extracted with ethyl acetate,

the combined organic layers were dried over anhydrous  $\text{Na}_2\text{SO}_4$  and evaporated under vacuum. The filtrate was concentrated in vacuo and purified by a silica gel packed flash chromatography column with petroleum ether/ethyl acetate (5:1) as the eluent to afford the desired product **4e** and **4o** separately, the ratio of **4e** and **4o** is 10.89.

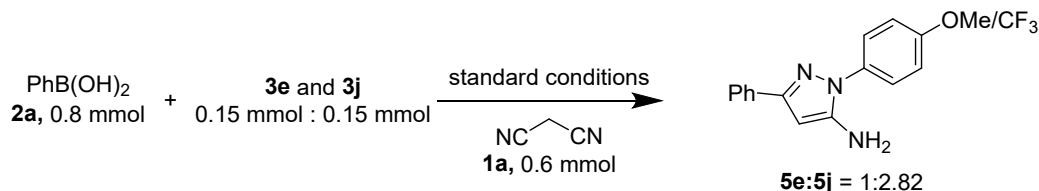

In a 10 mL Schlenk reaction tube, malononitrile (**1a**) (0.6 mmol, 2.0 equiv, 39.6 mg), phenylboronic acid (**2a**) (0.8 mmol, 2.6 equiv, 97.6mg), 4-methoxyphenylhydrazine hydrochloride (**3e**) (0.15 mmol, 1.0 equiv, 26.2mg), 4-(trifluoromethyl)phenylhydrazine hydrochloride (**3j**) (0.15 mmol, 1.0 equiv, 31.9 mg),  $\text{Ni(dppp)Cl}_2$  (0.03 mmol, 10 mol %, 16.3 mg),  $\text{ZnCl}_2$  (0.6 mmol, 2.0 equiv, 81.8mg), were dissolved in tetrahydrofuran (2.0 mL) under  $\text{N}_2$  atmosphere. The reaction mixture was then heated at 100 °C (oil bath) with vigorous stirring for 24 hours. After the reaction equilibrium, the mixture was poured into ethyl acetate, which was washed with saturated  $\text{NaHCO}_3$  ( $2 \times 10$  mL) and then brine ( $1 \times 10$  mL). After the aqueous layer was extracted with ethyl acetate, the combined organic layers were dried over anhydrous  $\text{Na}_2\text{SO}_4$  and evaporated under vacuum. The filtrate was concentrated in vacuo and purified by a silica gel packed flash chromatography column with petroleum ether/ethyl acetate (5:1) as the eluent to afford the desired product **5e** and **5j** separately, the ratio of **5e** and **5j** is 1 to 2.82.

## 6. Reference

1. J. C. Antilla, J. M. Baskin, T. E. Barder and S. L. Buchwald, *J. Org. Chem.*, 2004, **69**, 5578–5587.
2. G. J. Reddy, D. Latha and K. Srinivasa Rao, *Org. Prep. Proced. Int.*, 2004, **36**, 494–498.
3. T. De Paulis, K. Hemstapat, Y. Chen, Y. Zhang, S. Saleh, D. Alagille, R. M. Baldwin, G. D. Tamagnan and P. J. Conn, *J. Med. Chem.* 2006, **49**, 3332–3344.
4. L. Zare, N.O. Mahmoodi, A. Yahyazadeh, M. Mamaghani and K. Tabatabaeian, *Chin. Chem. Lett.* 2010, **21**, 538–541.

5. G. Tsolomiti, K. Tsolomiti and A. Tsolomiti, *Heterocycl. Commun.* 2007, **13**, 161–164.
6. Z. Chen, Q. Yan, H. Yi, Z. Liu, A. Lei and Y. Zhang, *Chem. Eur. J.* 2014, **20**, 17635–17639.
7. V. T. Humne, S. G. Konda, K. Hasanzadeh, P. D. Lokhande, *Chinese Chemical Letters.* 2011, **20**, 1435–1438.

## 7. NMR Spectra for All Products

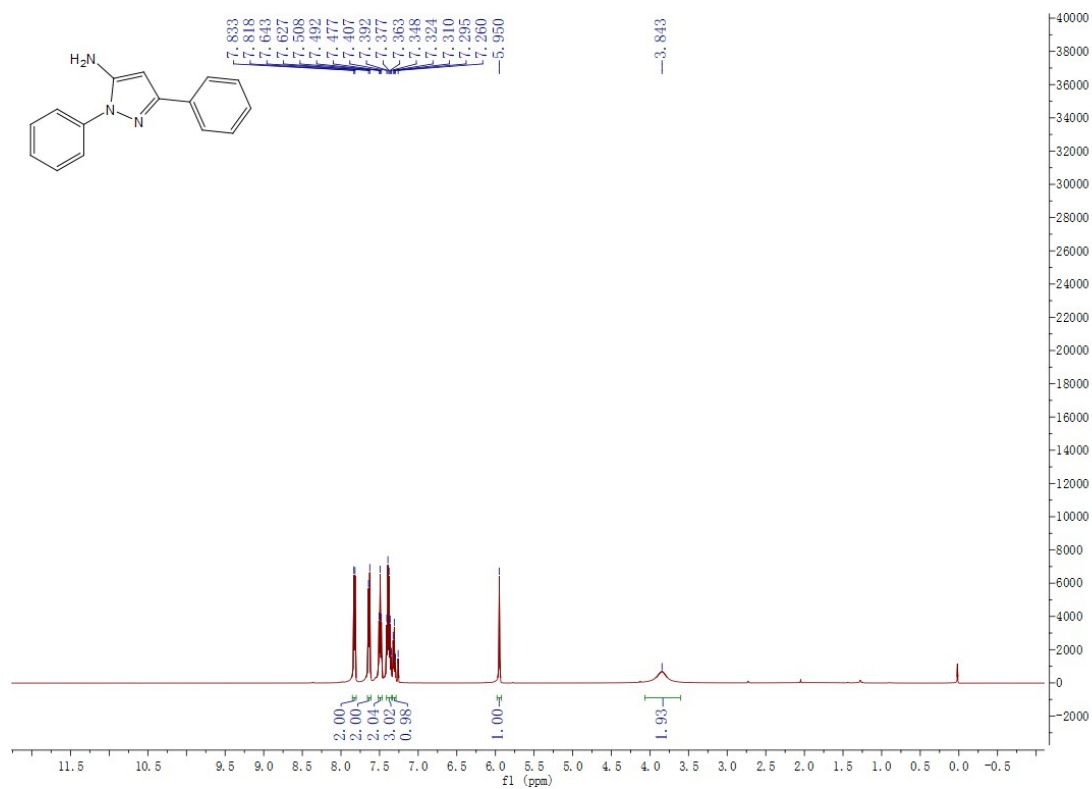

$^1\text{H}$  NMR (500 MHz,  $\text{CDCl}_3$ ) of compound **4a**



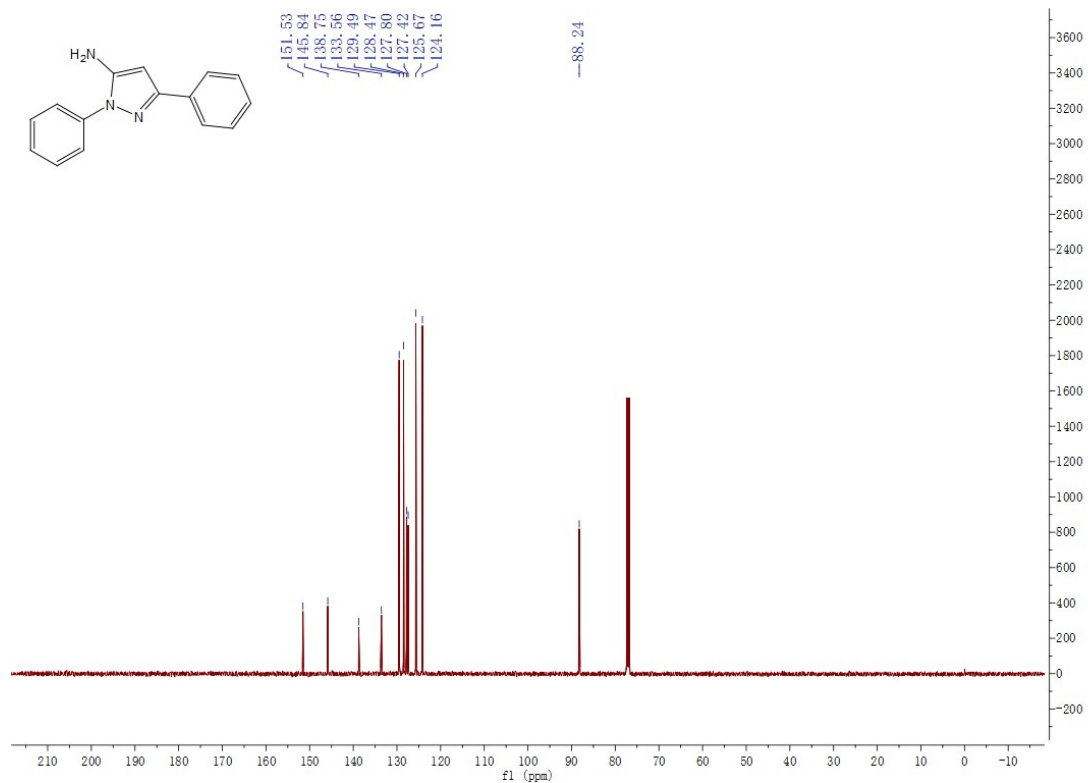

$^{13}\text{C}$  NMR (125 MHz,  $\text{CDCl}_3$ ) of compound **4a**

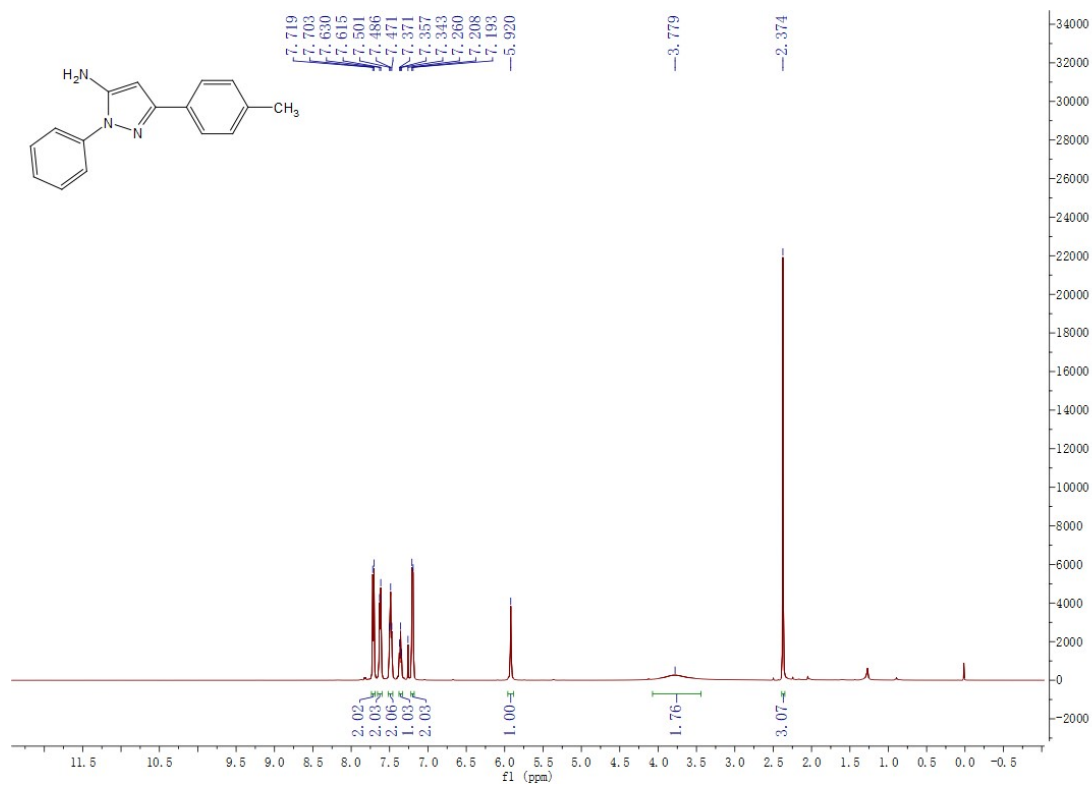

$^1\text{H}$  NMR (500 MHz,  $\text{CDCl}_3$ ) of compound **4b**

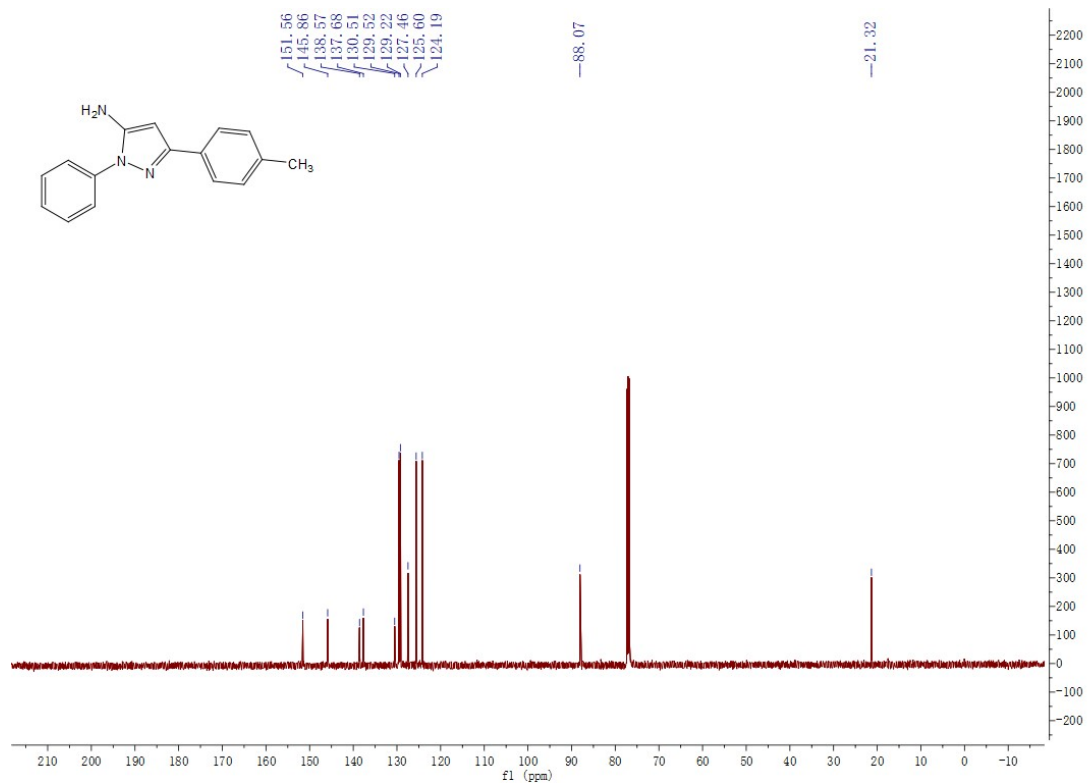

$^{13}\text{C}$  NMR (125 MHz,  $\text{CDCl}_3$ ) of compound **4b**

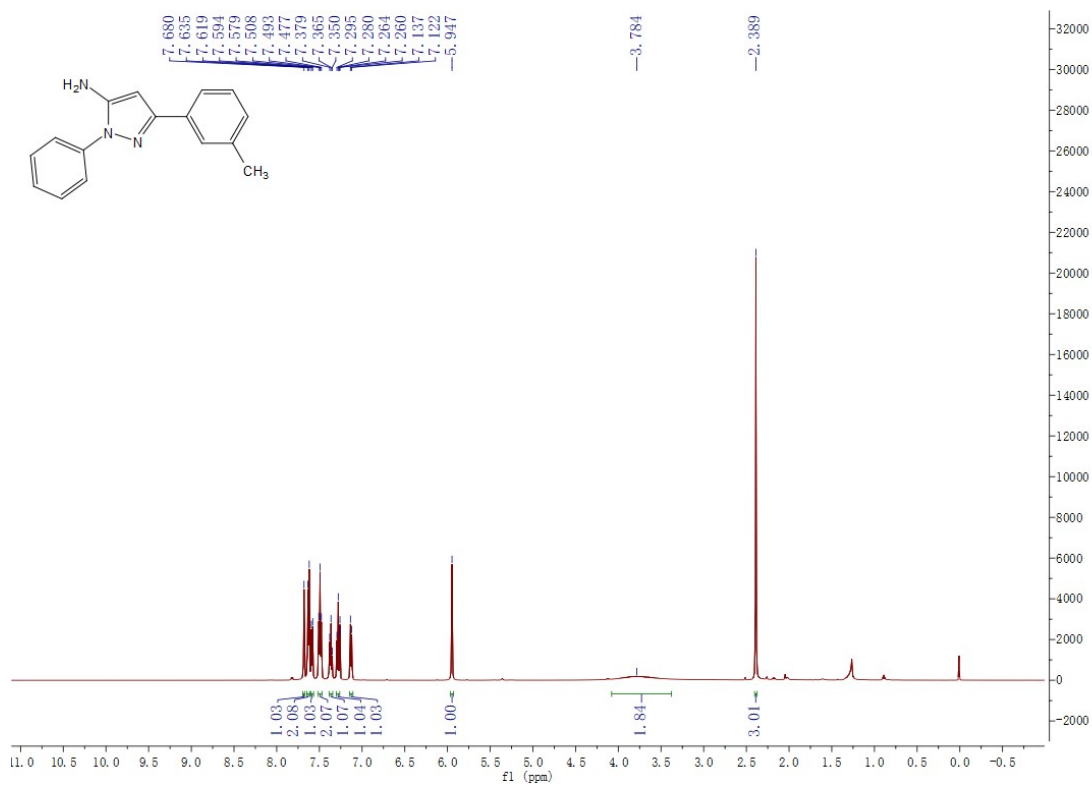

$^1\text{H}$  NMR (500 MHz,  $\text{CDCl}_3$ ) of compound **4c**

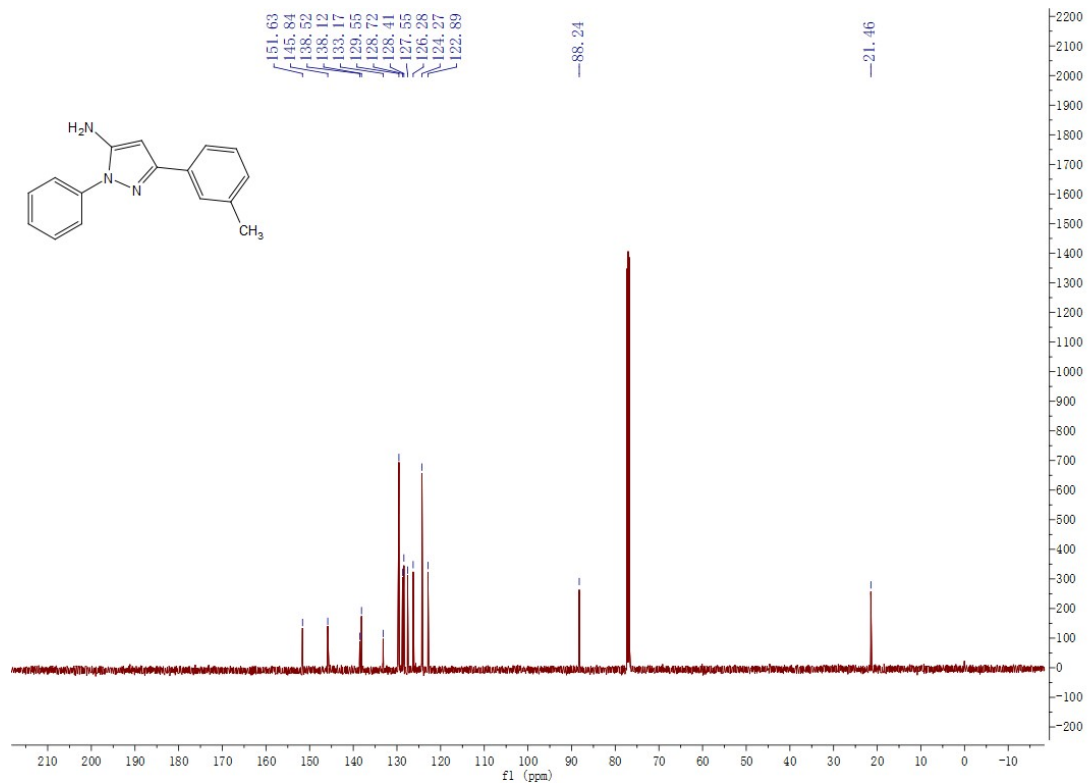

$^{13}\text{C}$  NMR (125 MHz,  $\text{CDCl}_3$ ) of compound 4c

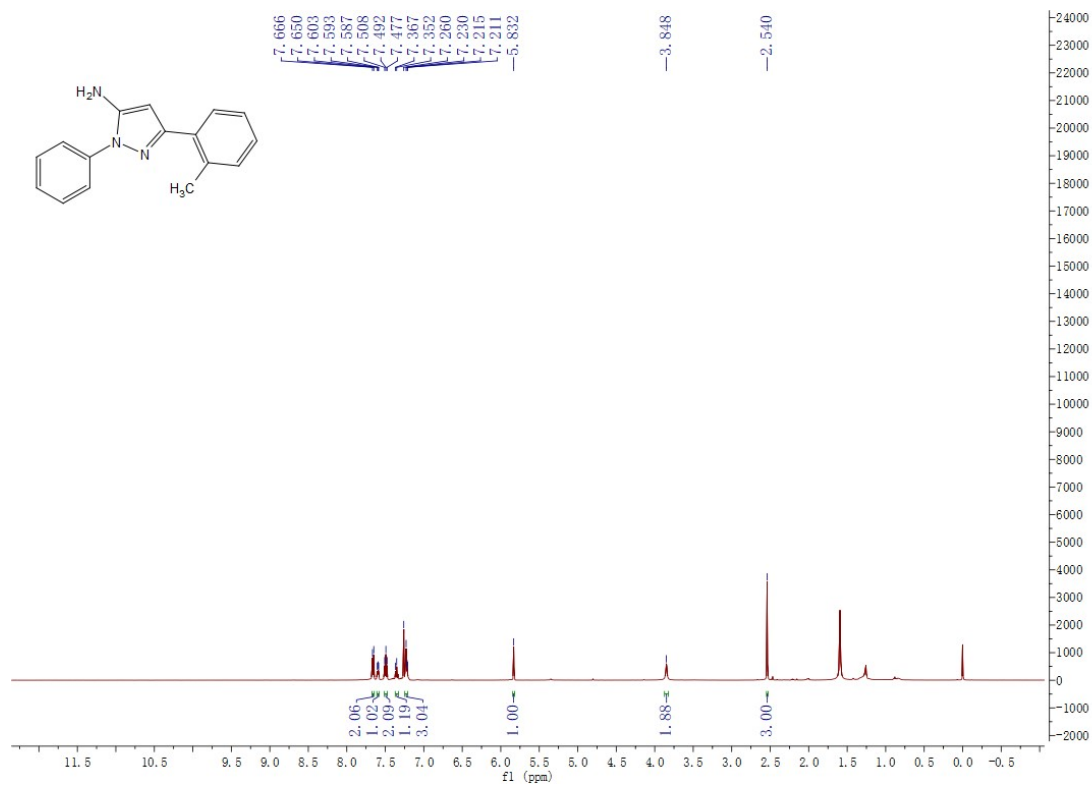

$^1\text{H}$  NMR (500 MHz,  $\text{CDCl}_3$ ) of compound 4d

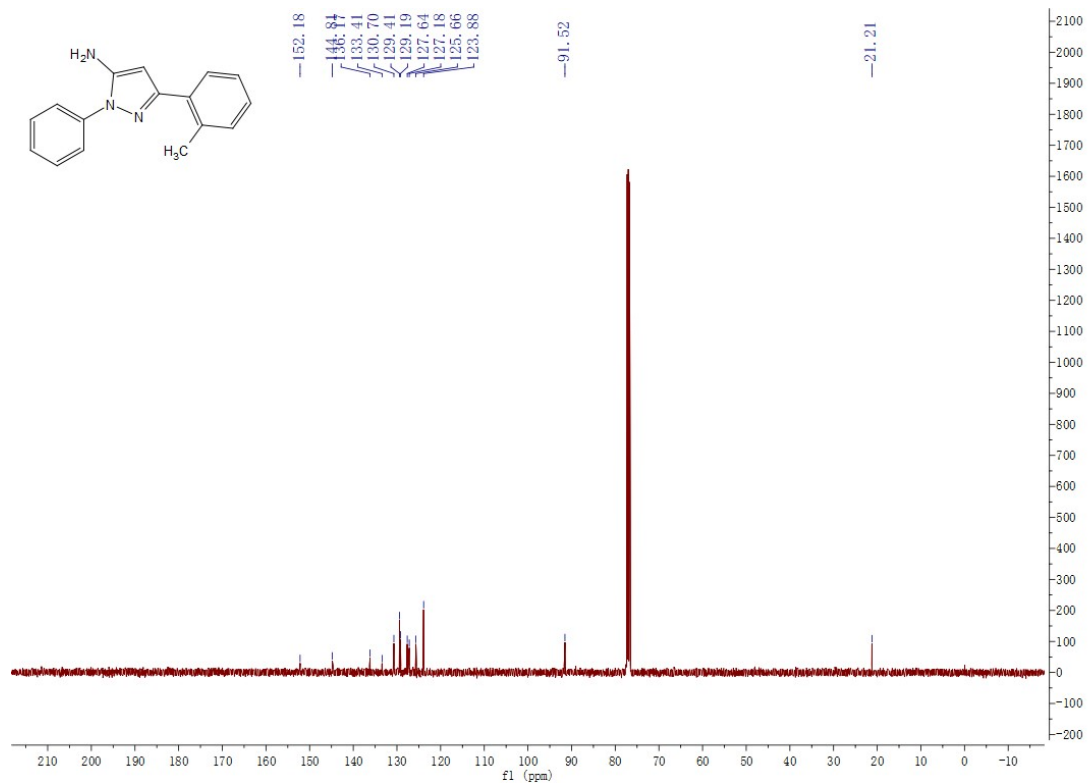

$^{13}\text{C}$  NMR (125 MHz,  $\text{CDCl}_3$ ) of compound **4d**

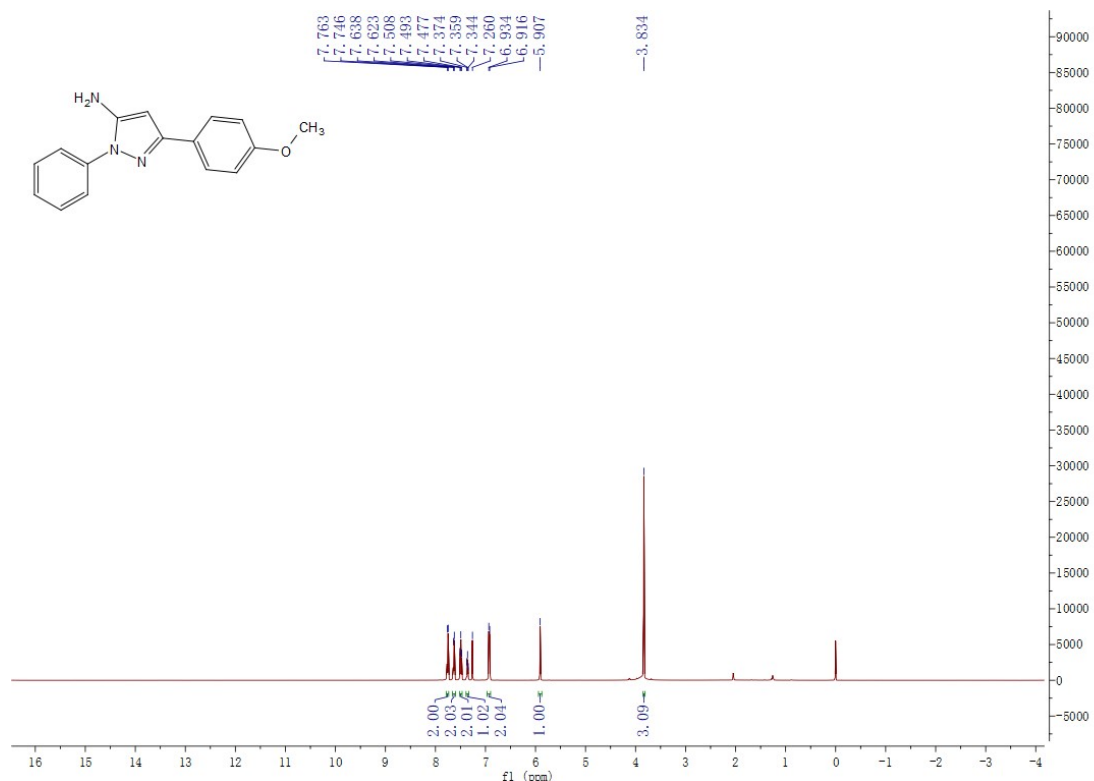

$^1\text{H}$  NMR (500 MHz,  $\text{CDCl}_3$ ) of compound **4e**

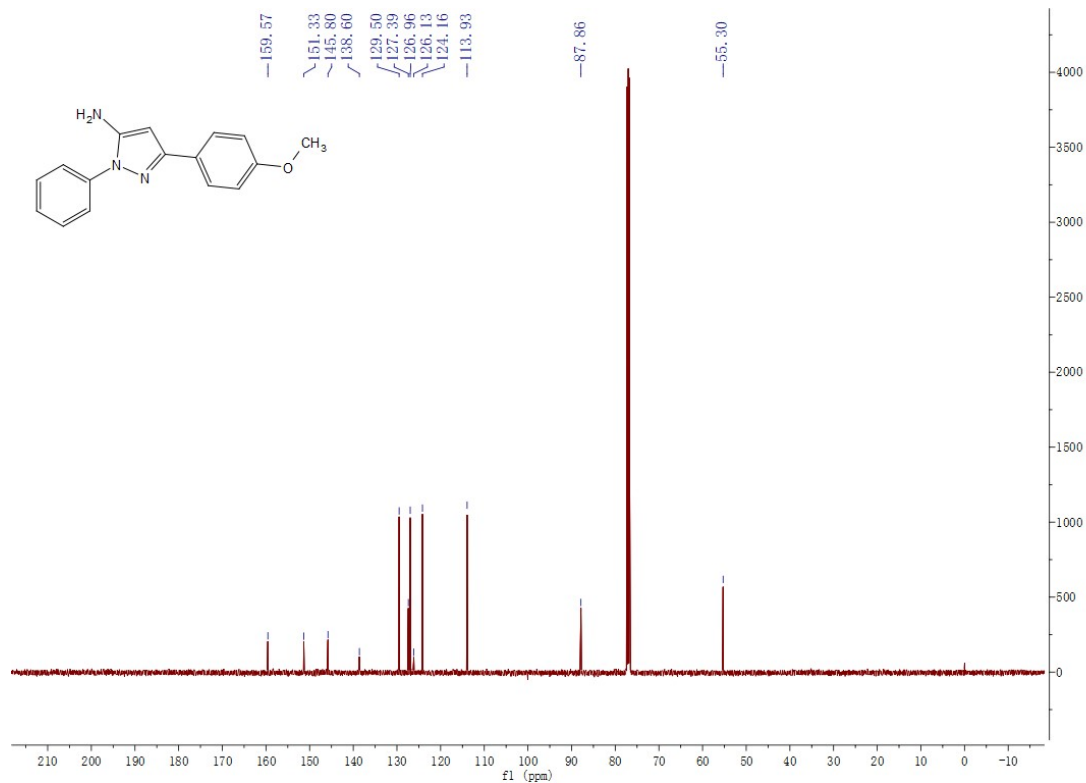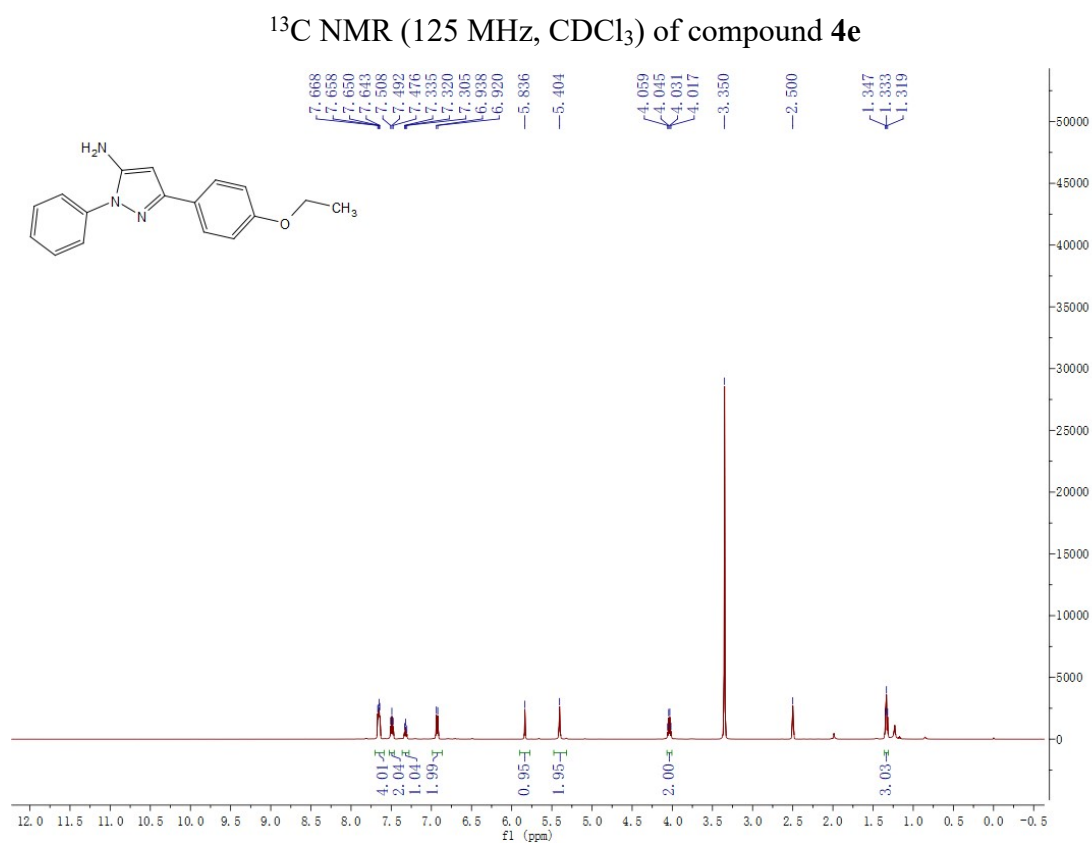

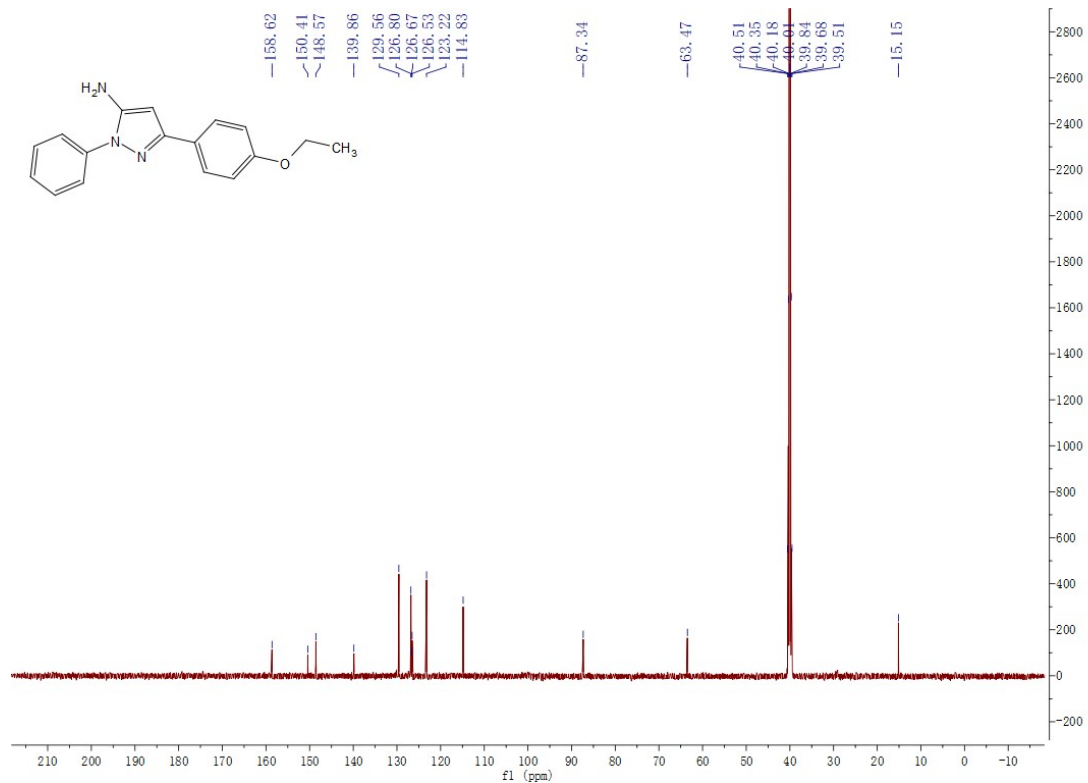

$^{13}\text{C}$  NMR (125 MHz,  $\text{DMSO-}d_6$ ) of compound **4f**

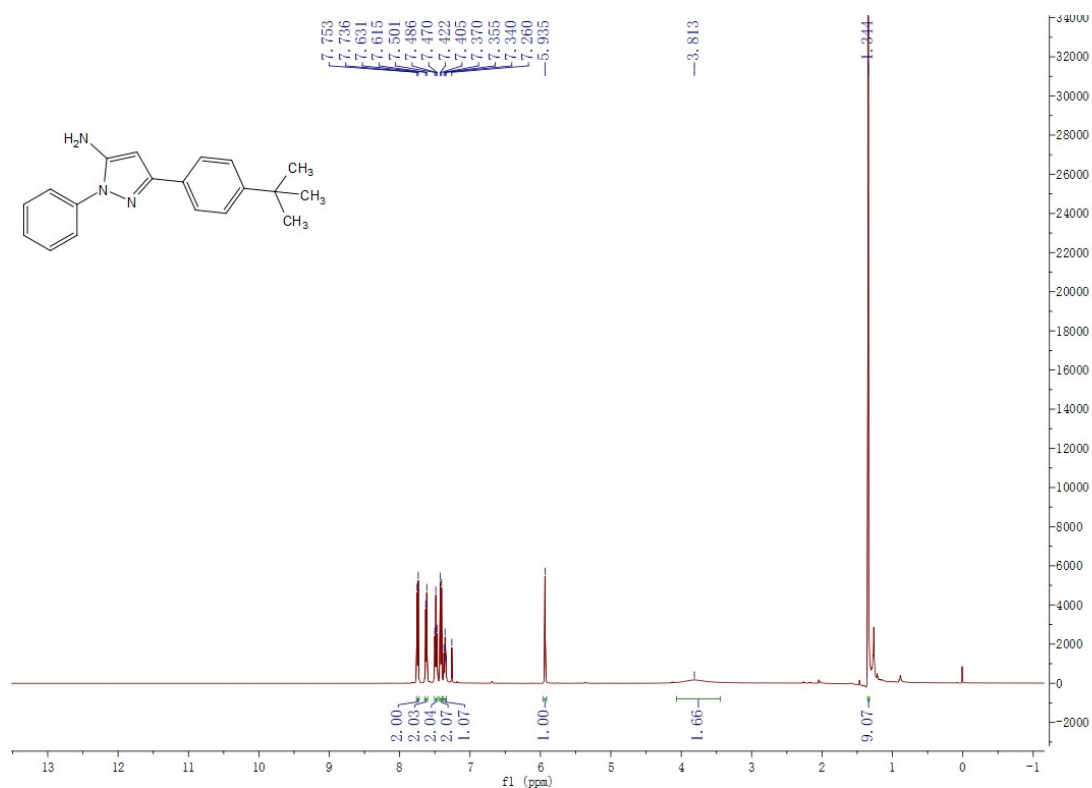

$^1\text{H}$  NMR (500 MHz,  $\text{CDCl}_3$ ) of compound **4g**

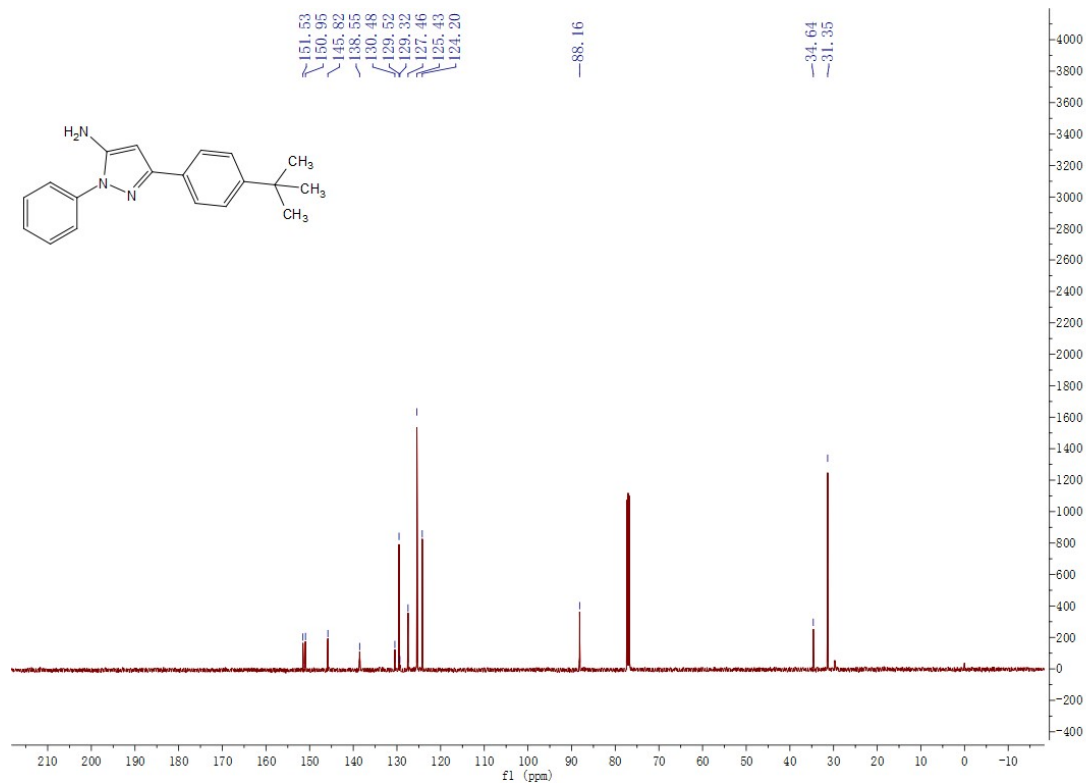

$^{13}\text{C}$  NMR (125 MHz,  $\text{CDCl}_3$ ) of compound **4g**

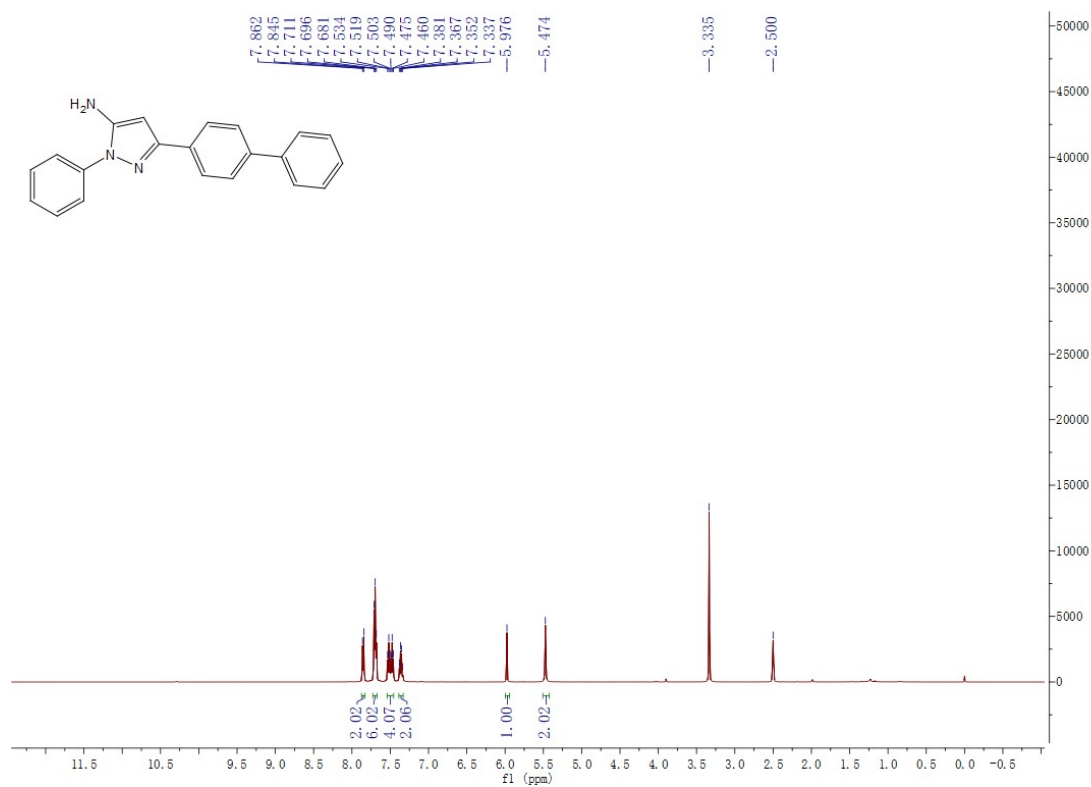

$^1\text{H}$  NMR (500 MHz,  $\text{DMSO}-d_6$ ) of compound **4h**

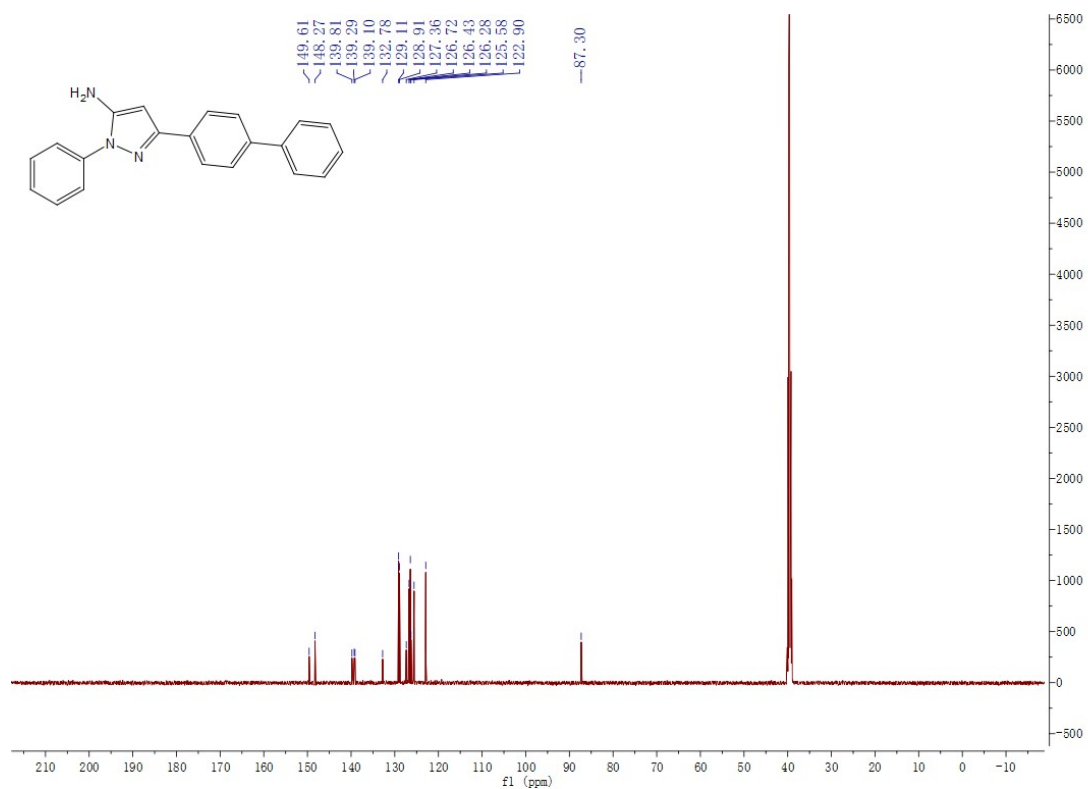

<sup>13</sup>C NMR (125 MHz, DMSO-*d*<sub>6</sub>) of compound **4h**

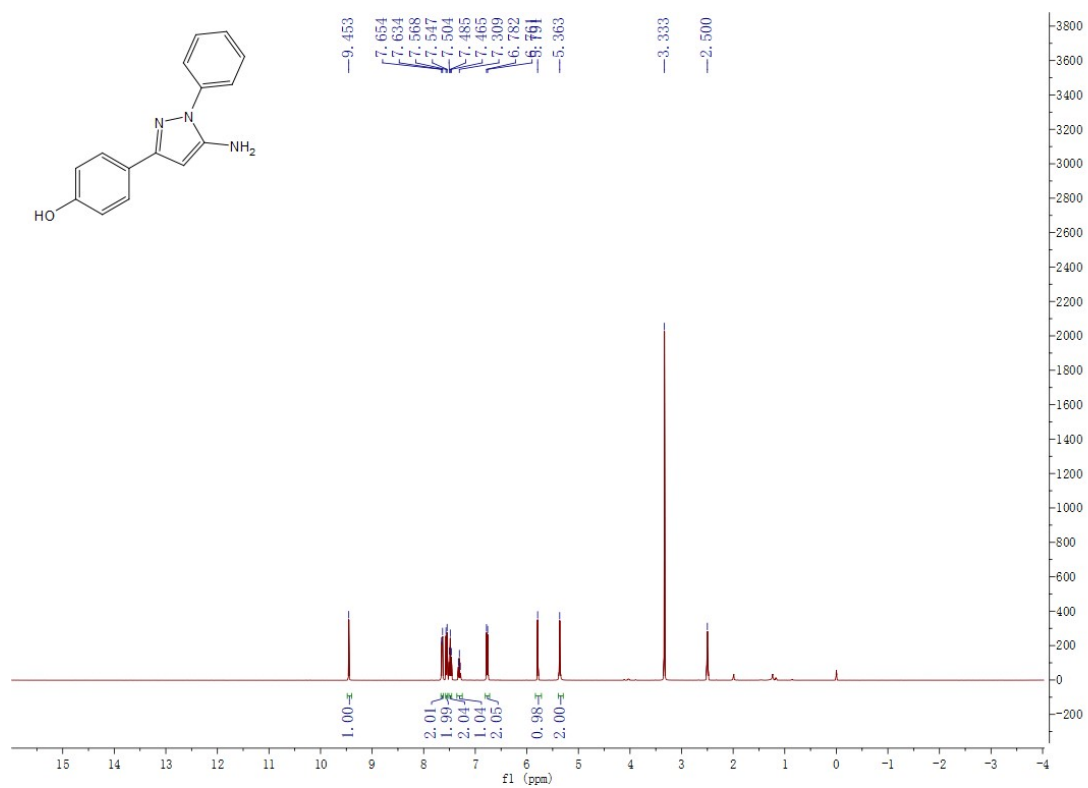

<sup>1</sup>H NMR (400 MHz, DMSO-*d*<sub>6</sub>) of compound **4i**



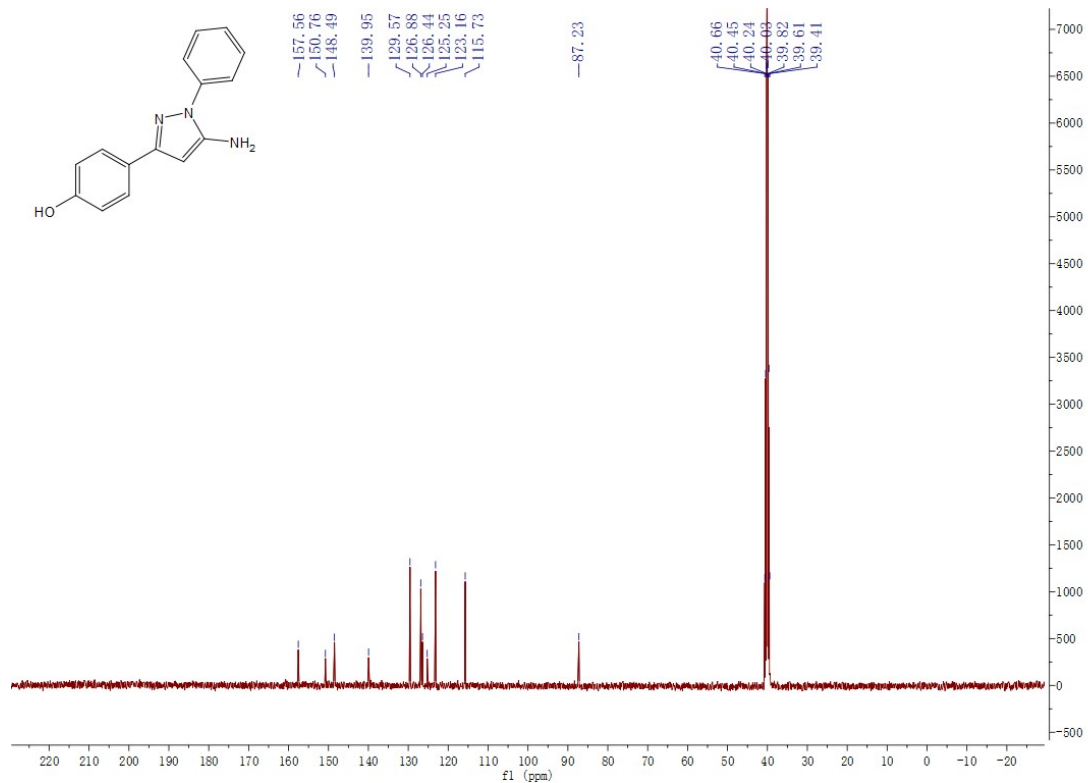

$^{13}\text{C}$  NMR (101 MHz, DMSO- $d_6$ ) of compound **4i**

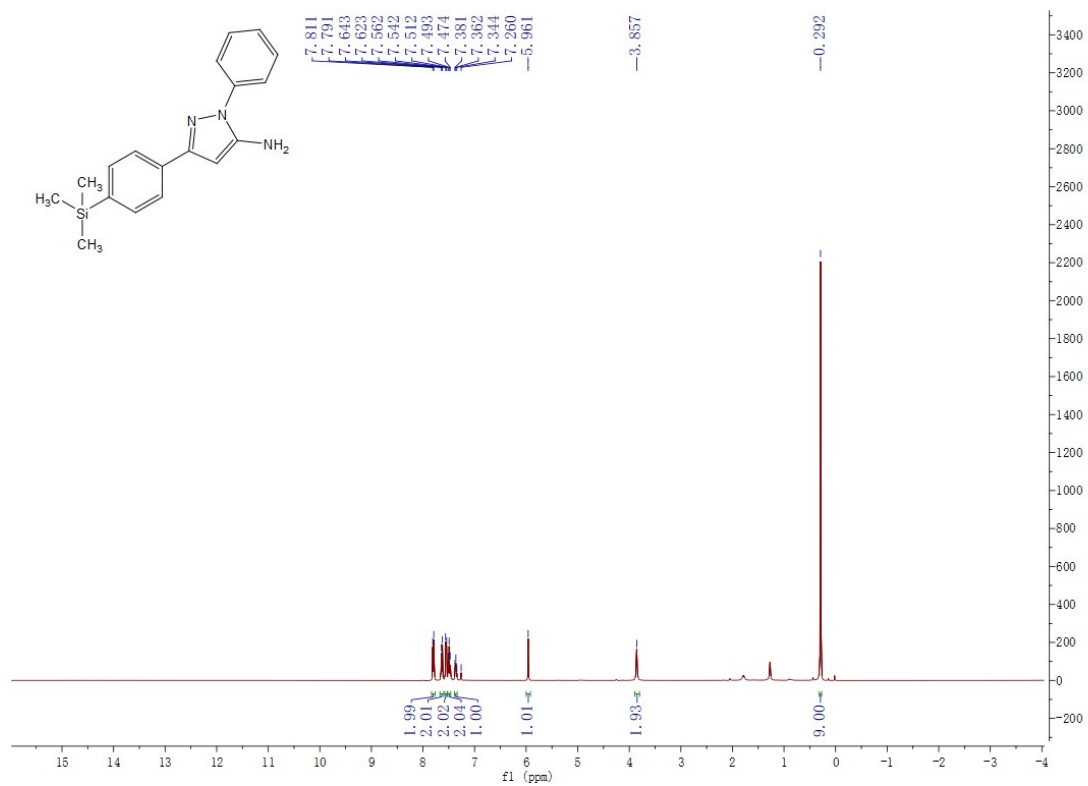

$^1\text{H}$  NMR (400 MHz,  $\text{CDCl}_3$ ) of compound **4j**

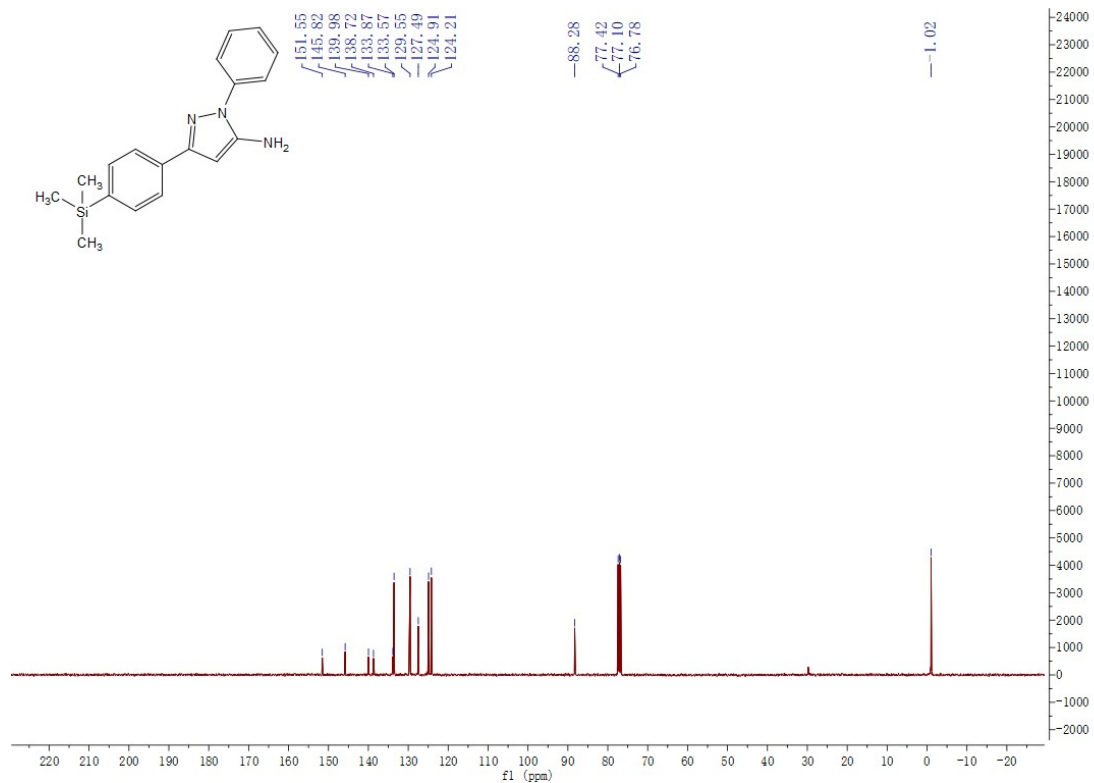

$^{13}\text{C}$  NMR (101 MHz,  $\text{CDCl}_3$ ) of compound **4j**

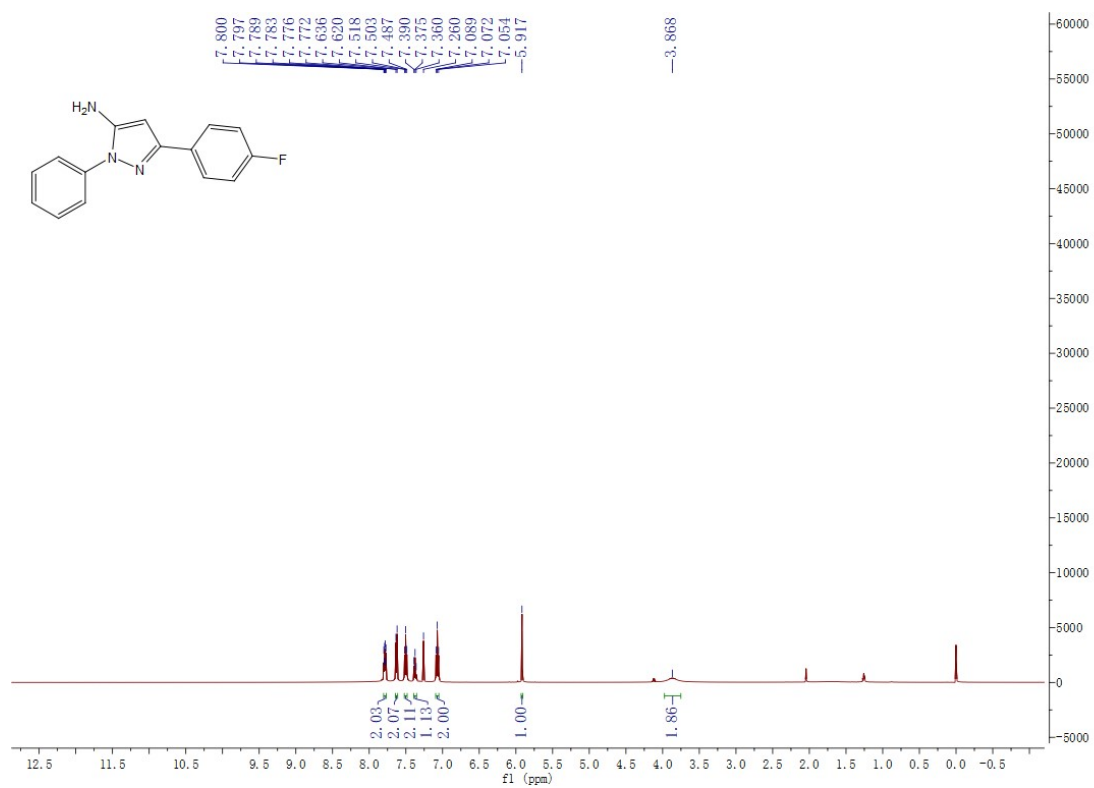

$^1\text{H}$  NMR (500 MHz,  $\text{CDCl}_3$ ) of compound **4k**

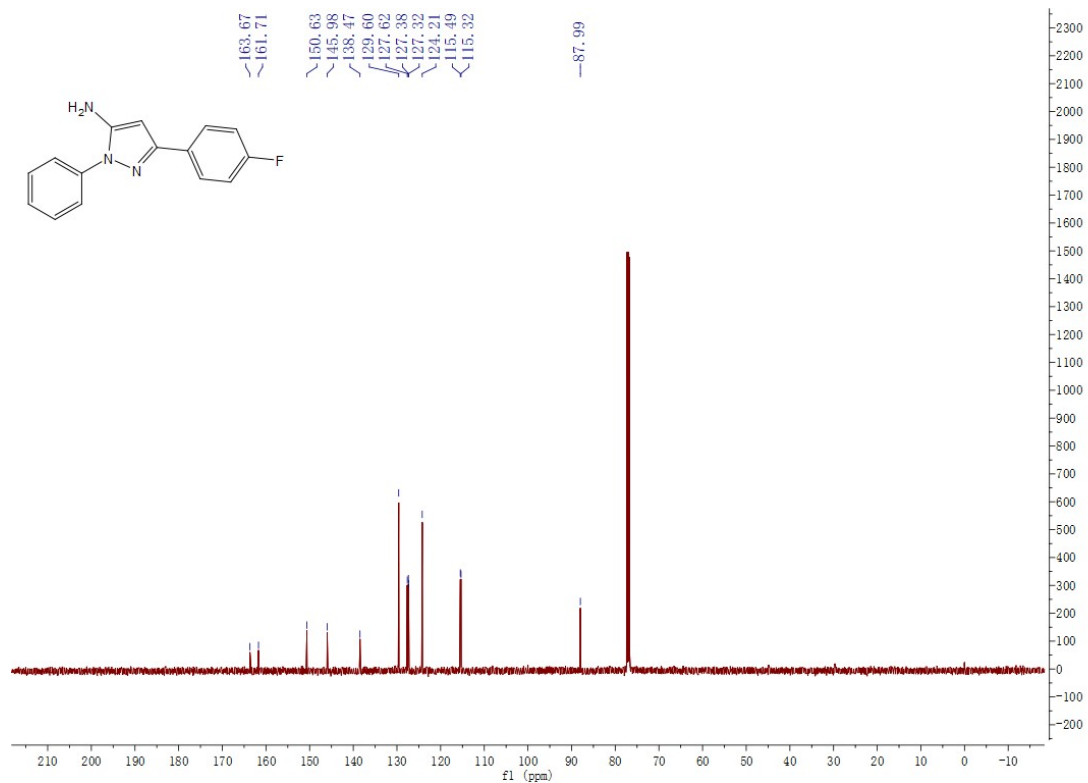

$^{13}\text{C}$  NMR (125 MHz,  $\text{CDCl}_3$ ) of compound 4k

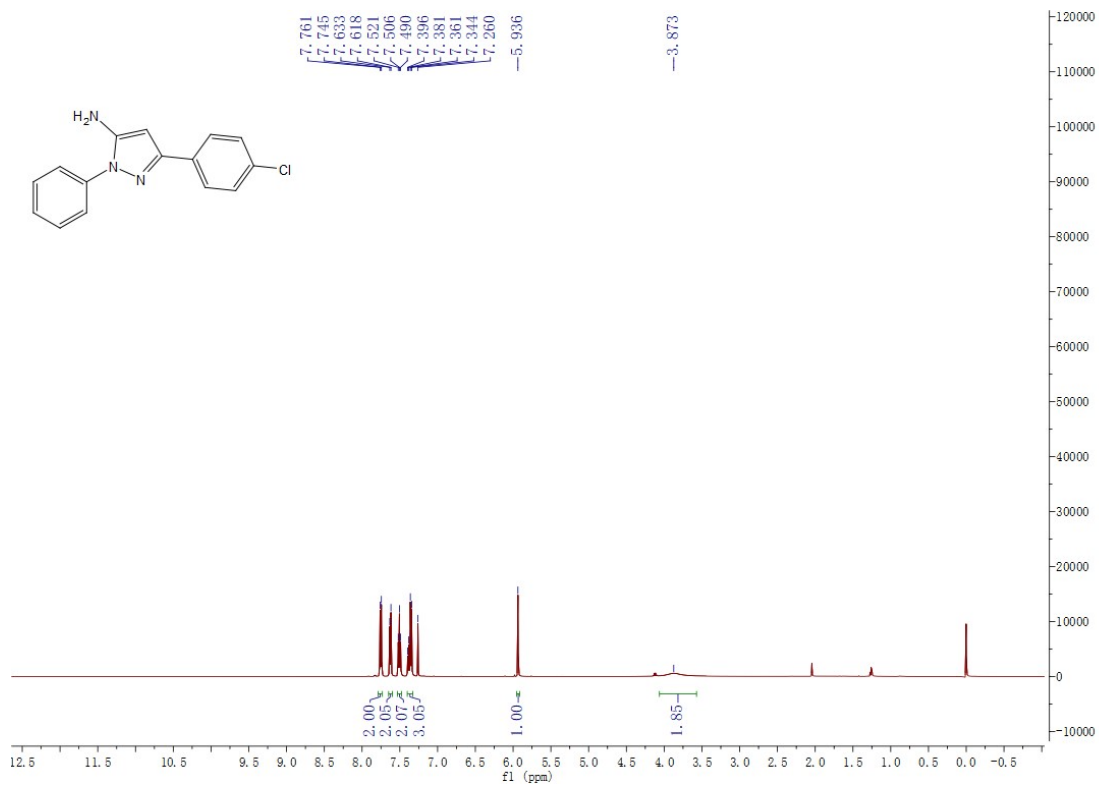

$^1\text{H}$  NMR (500 MHz,  $\text{CDCl}_3$ ) of compound 4l

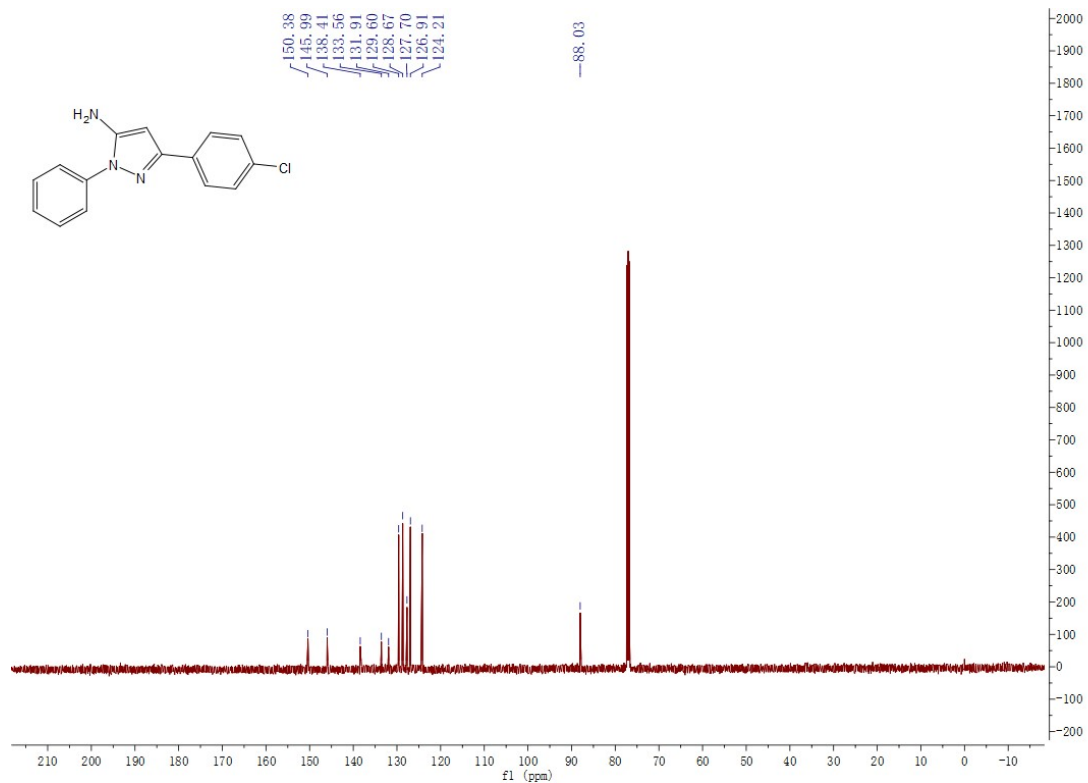

$^{13}\text{C}$  NMR (125 MHz,  $\text{CDCl}_3$ ) of compound **4l**

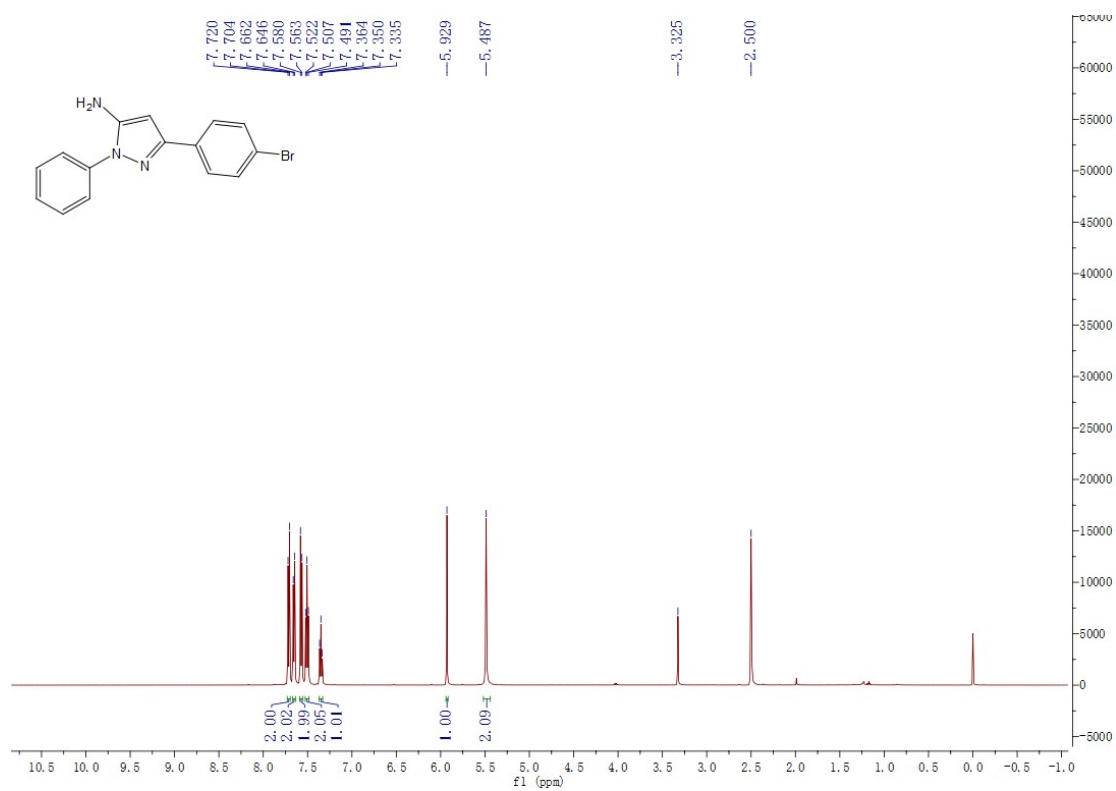

$^1\text{H}$  NMR (500 MHz,  $\text{DMSO}-d_6$ ) of compound **4m**

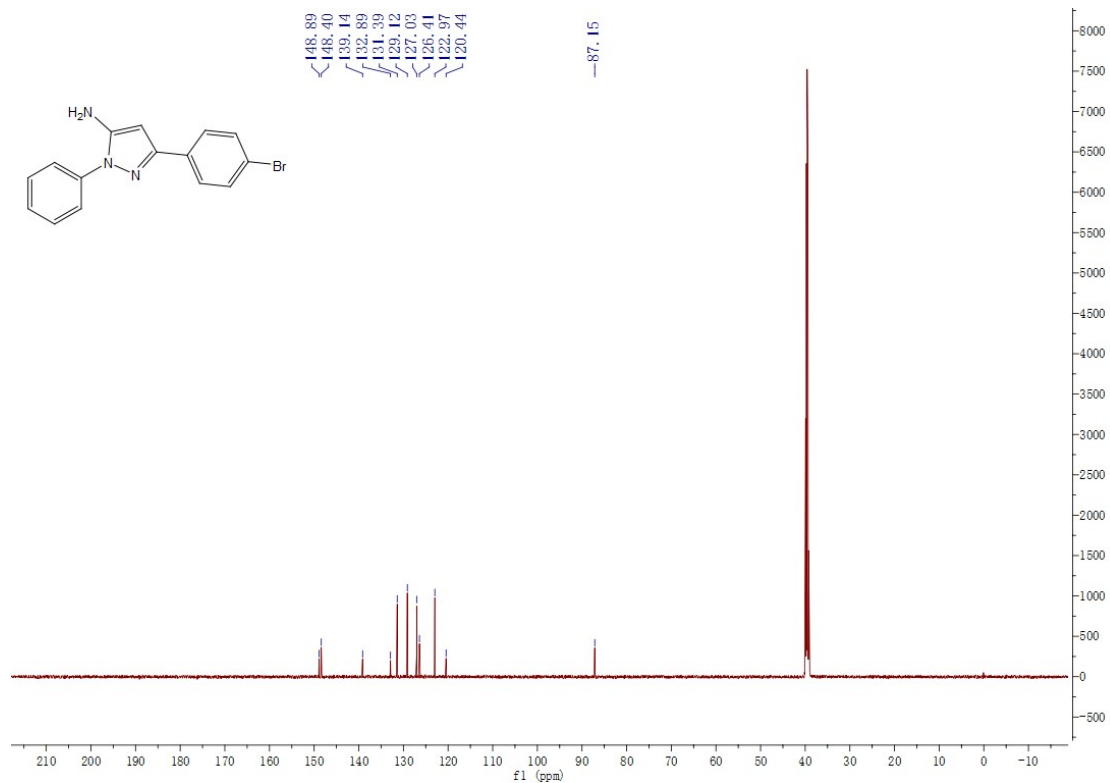

$^{13}\text{C}$  NMR (125 MHz,  $\text{DMSO-}d_6$ ) of compound **4m**

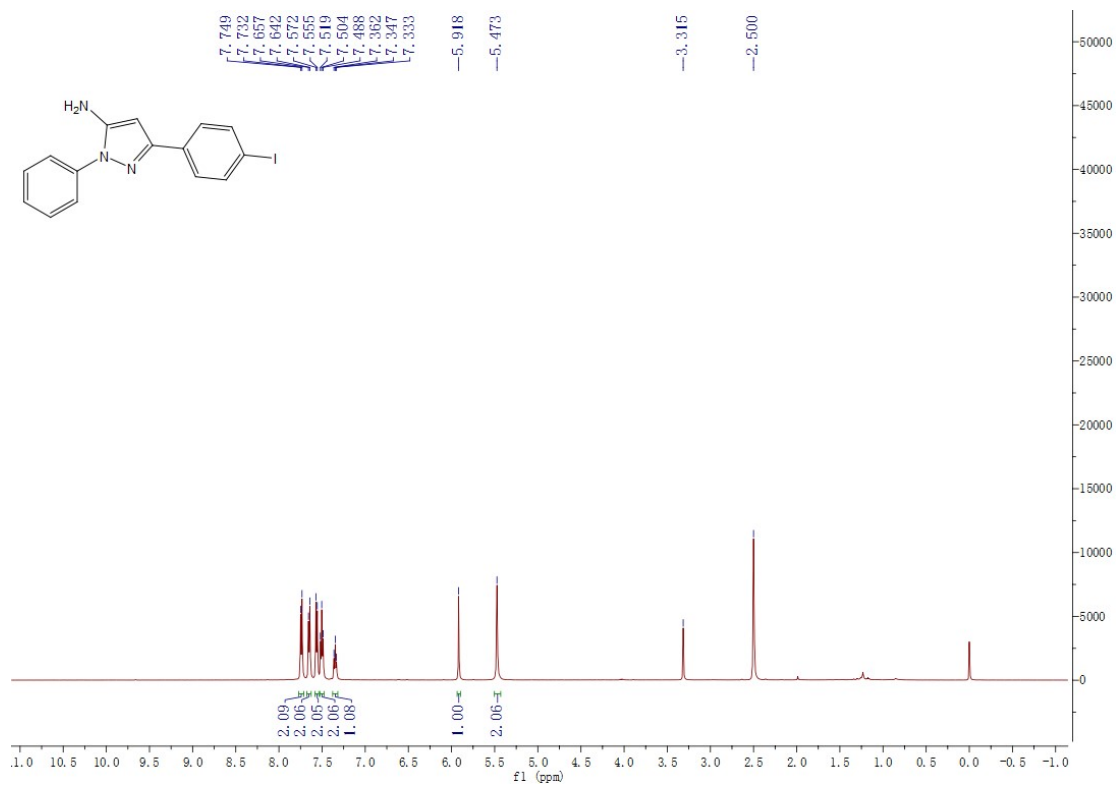

$^1\text{H}$  NMR (500 MHz,  $\text{DMSO-}d_6$ ) of compound **4n**

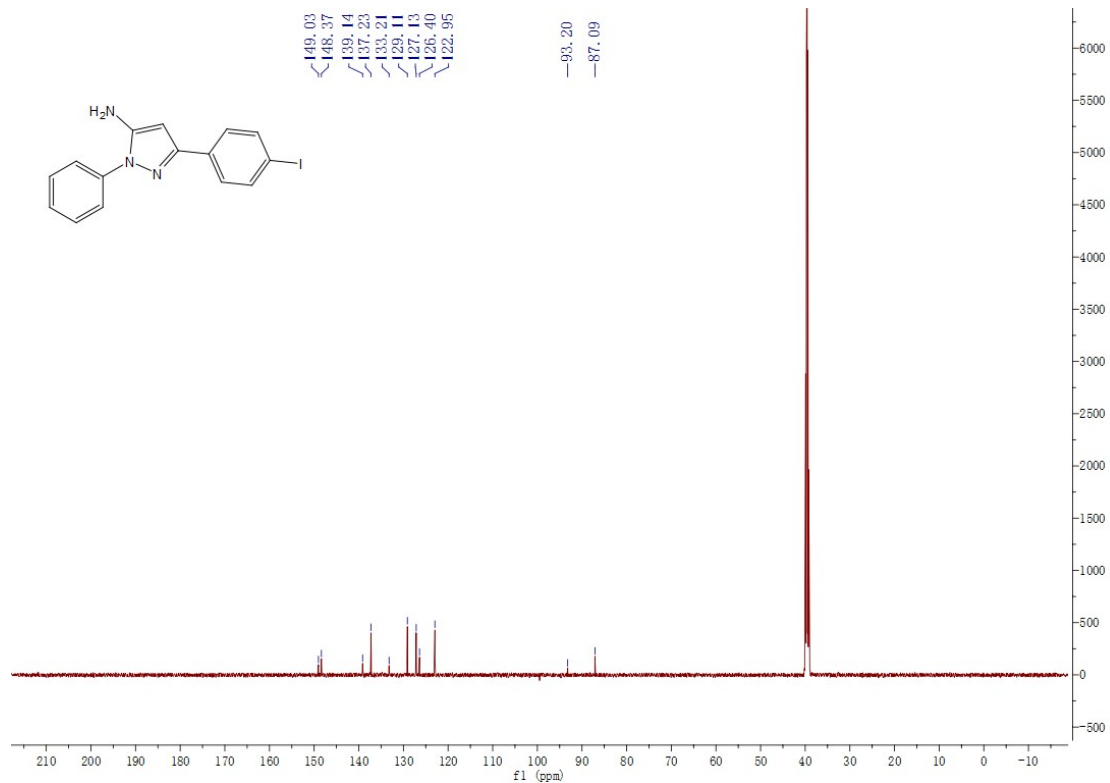

<sup>13</sup>C NMR (125 MHz, DMSO-*d*<sub>6</sub>) of compound **4n**

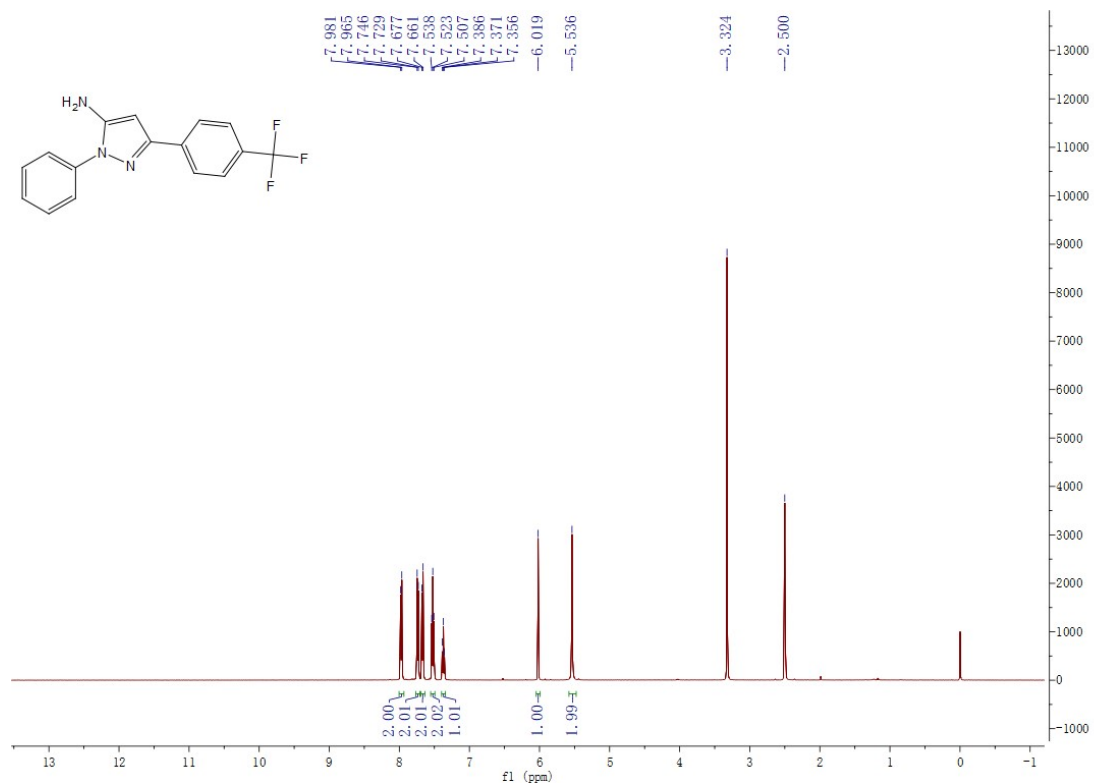

<sup>1</sup>H NMR (500 MHz, DMSO-*d*<sub>6</sub>) of compound **4o**

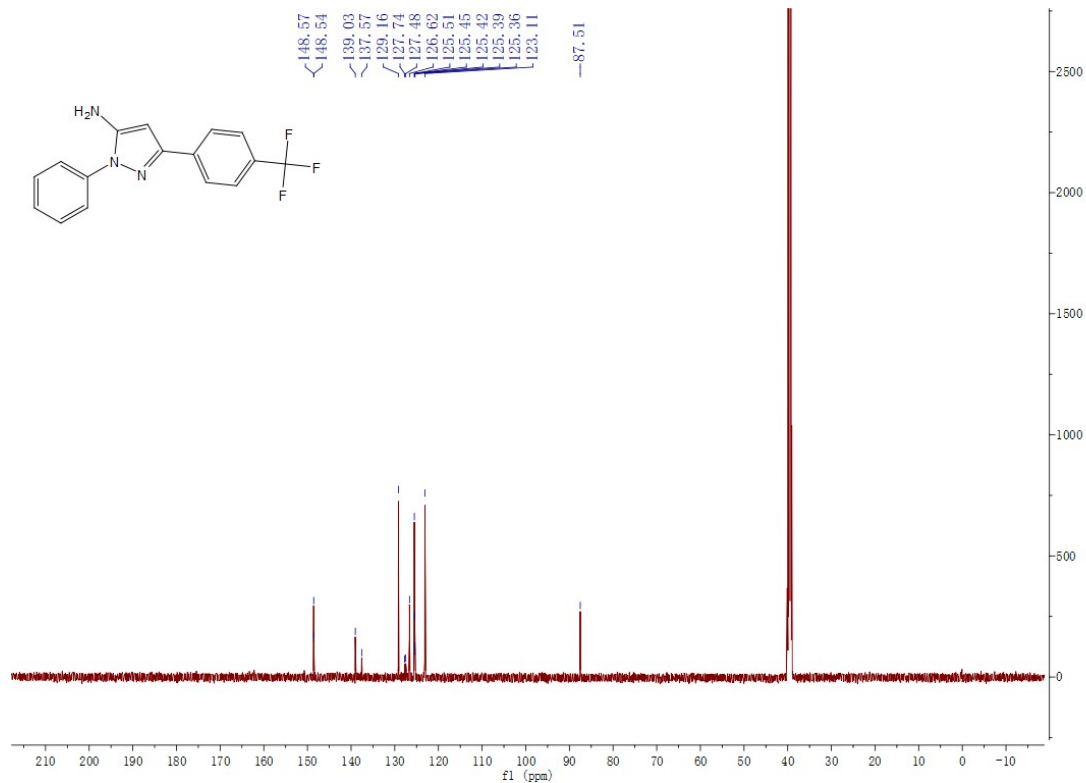

<sup>13</sup>C NMR (125 MHz, DMSO-*d*<sub>6</sub>) of compound **4o**

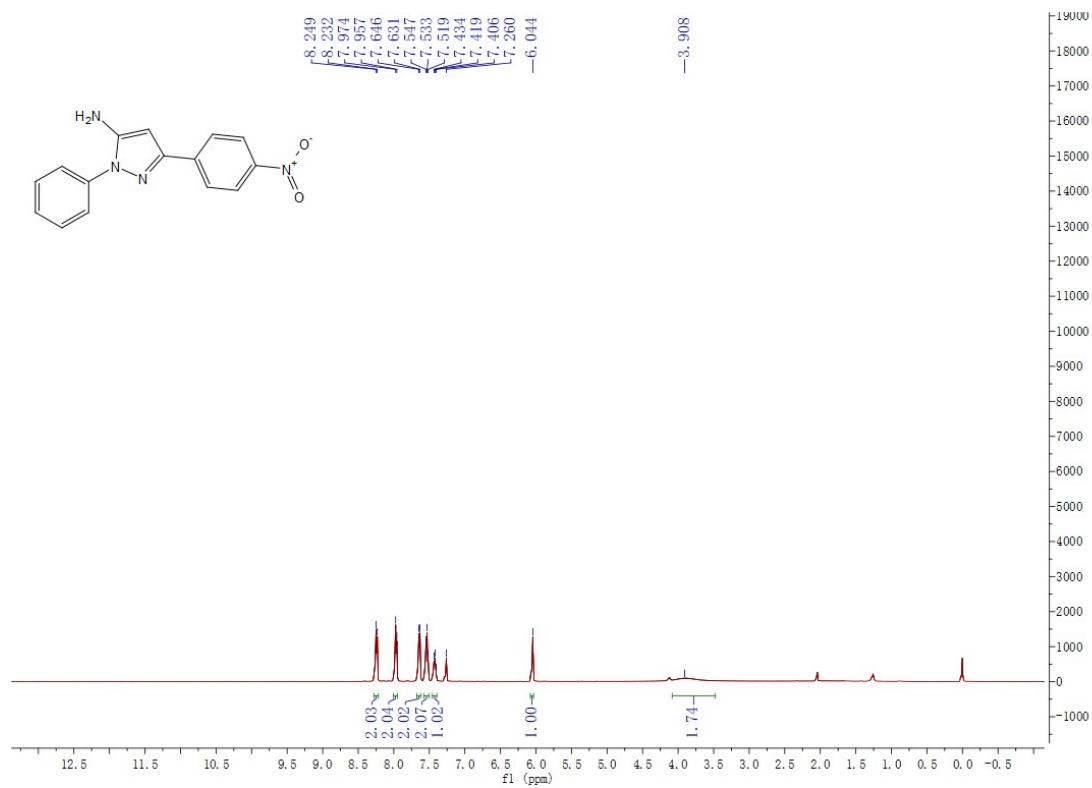

<sup>1</sup>H NMR (500 MHz, CDCl<sub>3</sub>) of compound **4p**

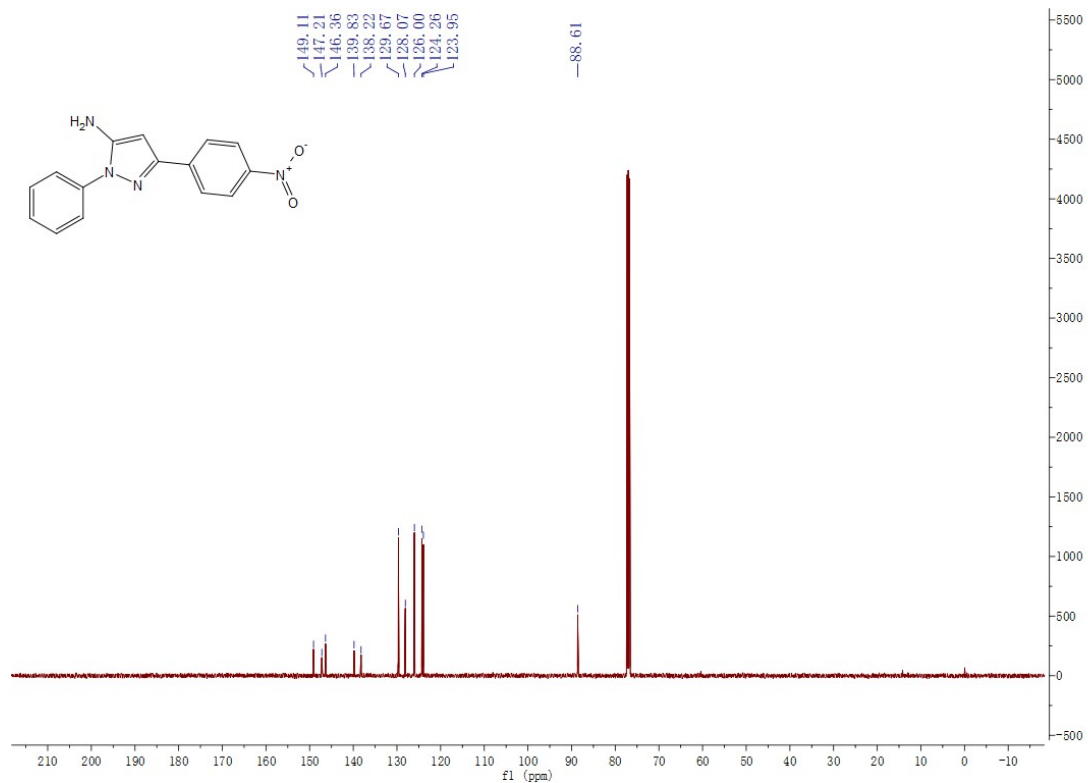

$^{13}\text{C}$  NMR (125 MHz,  $\text{CDCl}_3$ ) of compound **4p**

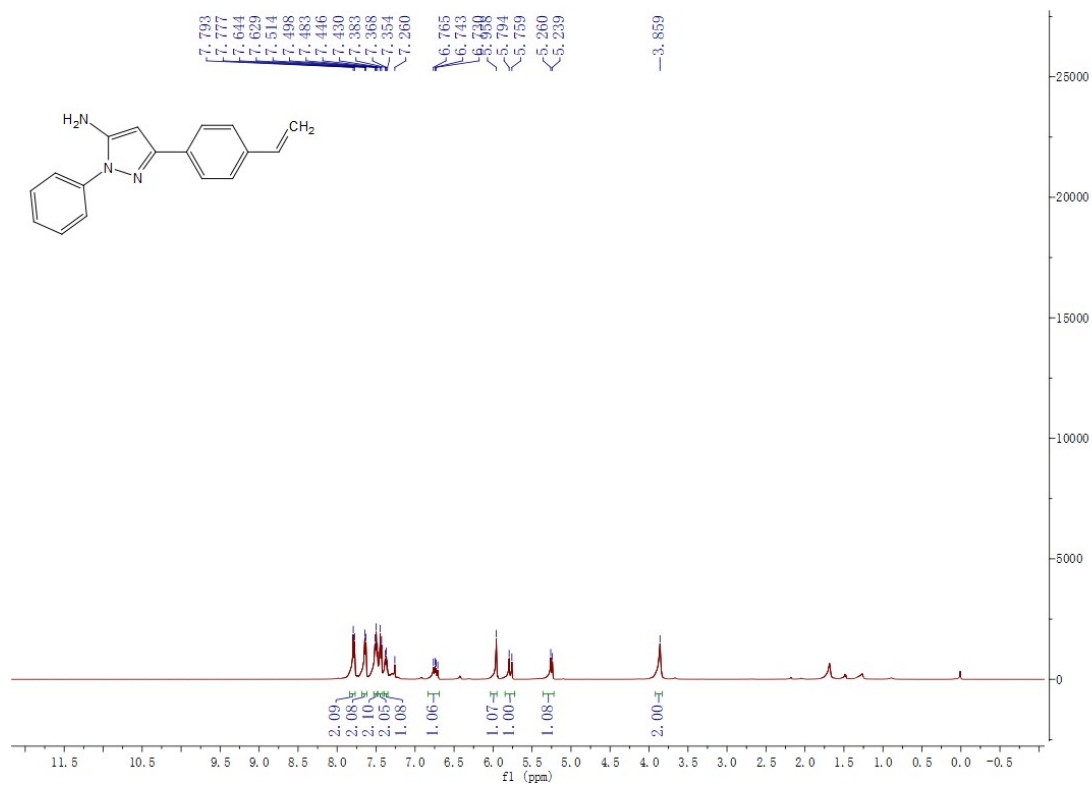

$^1\text{H}$  NMR (500 MHz,  $\text{CDCl}_3$ ) of compound **4q**



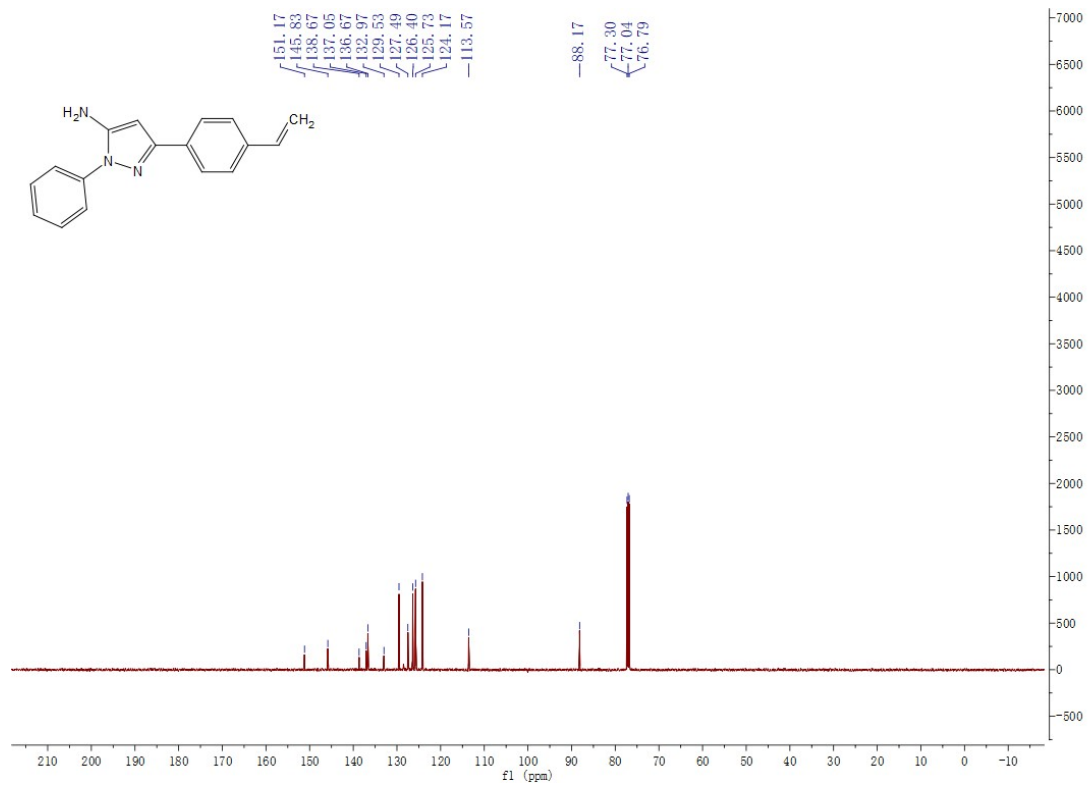

$^{13}\text{C}$  NMR (125 MHz,  $\text{CDCl}_3$ ) of compound **4q**

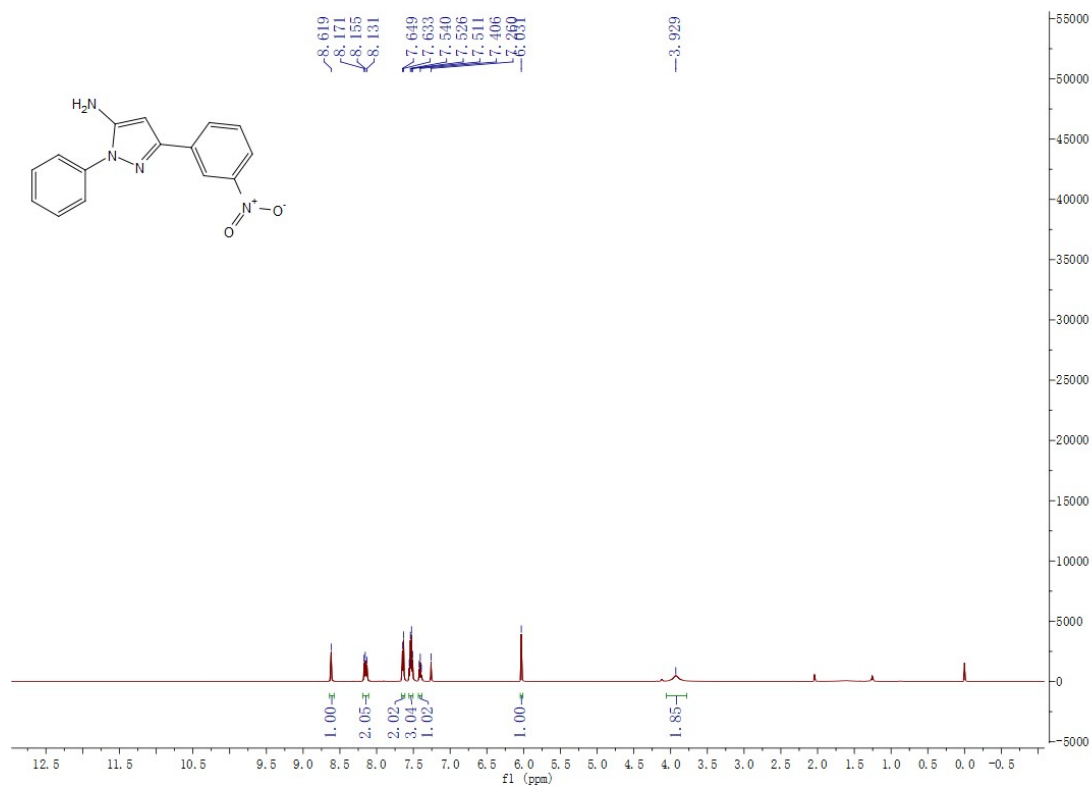

$^1\text{H}$  NMR (500 MHz,  $\text{CDCl}_3$ ) of compound **4r**

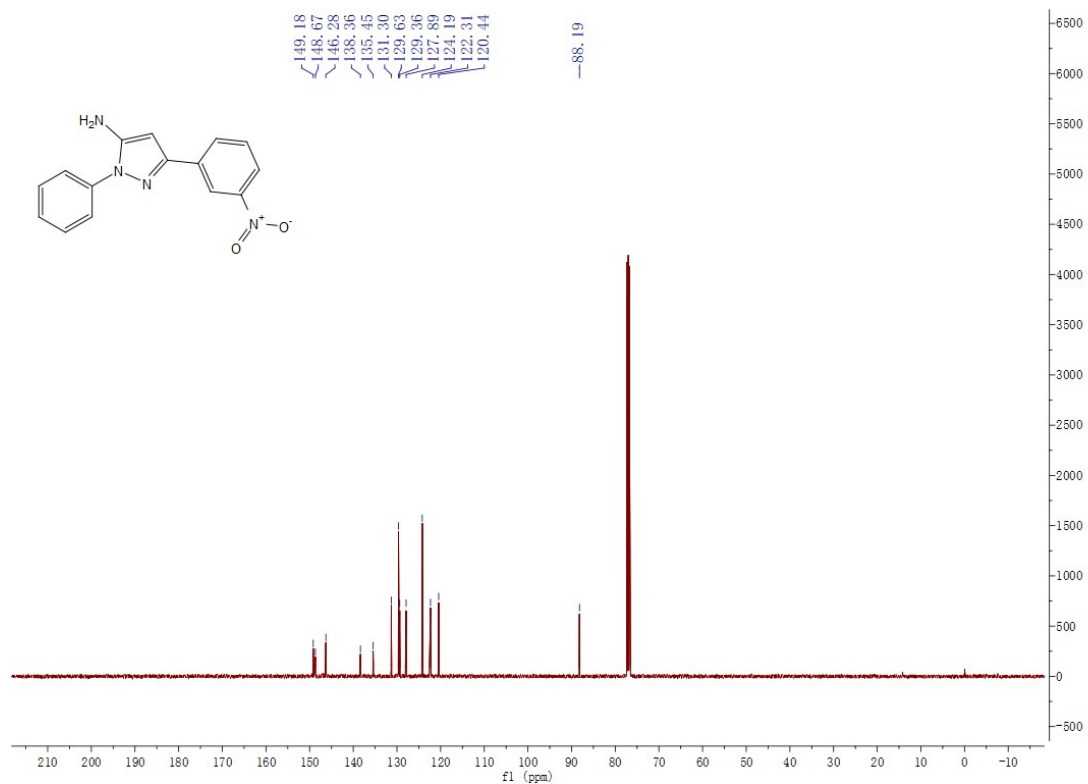

$^{13}\text{C}$  NMR (125 MHz,  $\text{CDCl}_3$ ) of compound **4r**

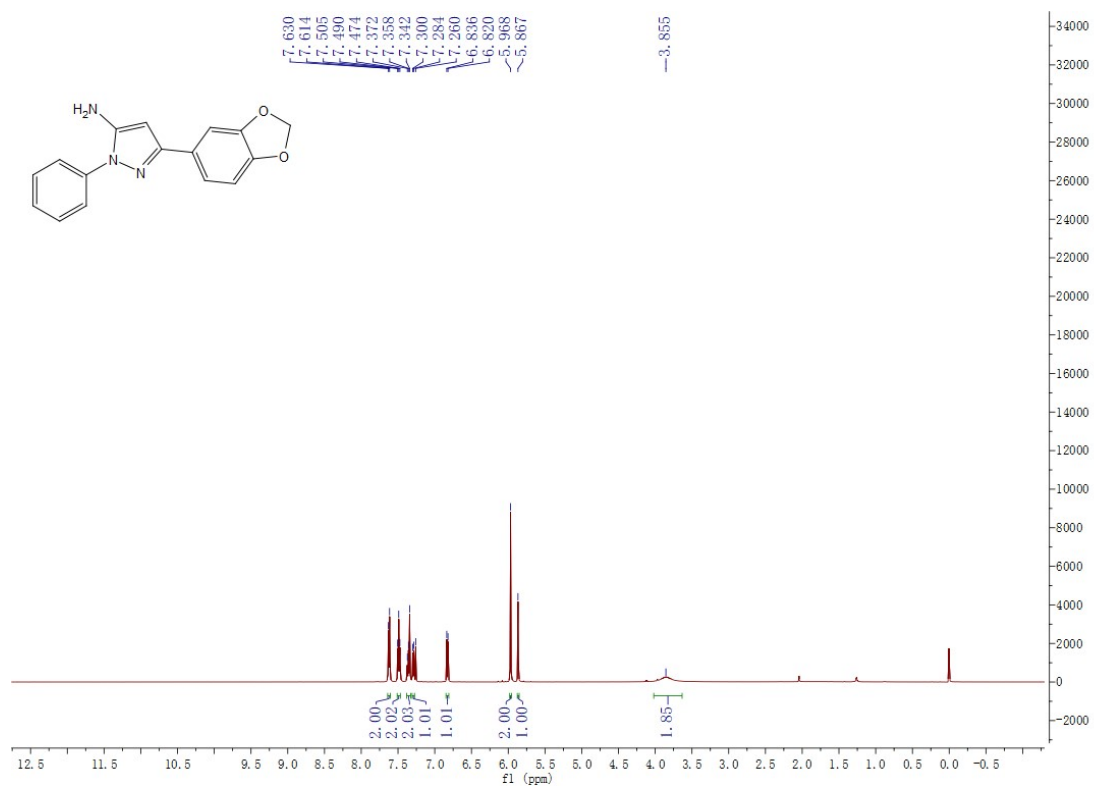

$^1\text{H}$  NMR (500 MHz,  $\text{CDCl}_3$ ) of compound **4s**

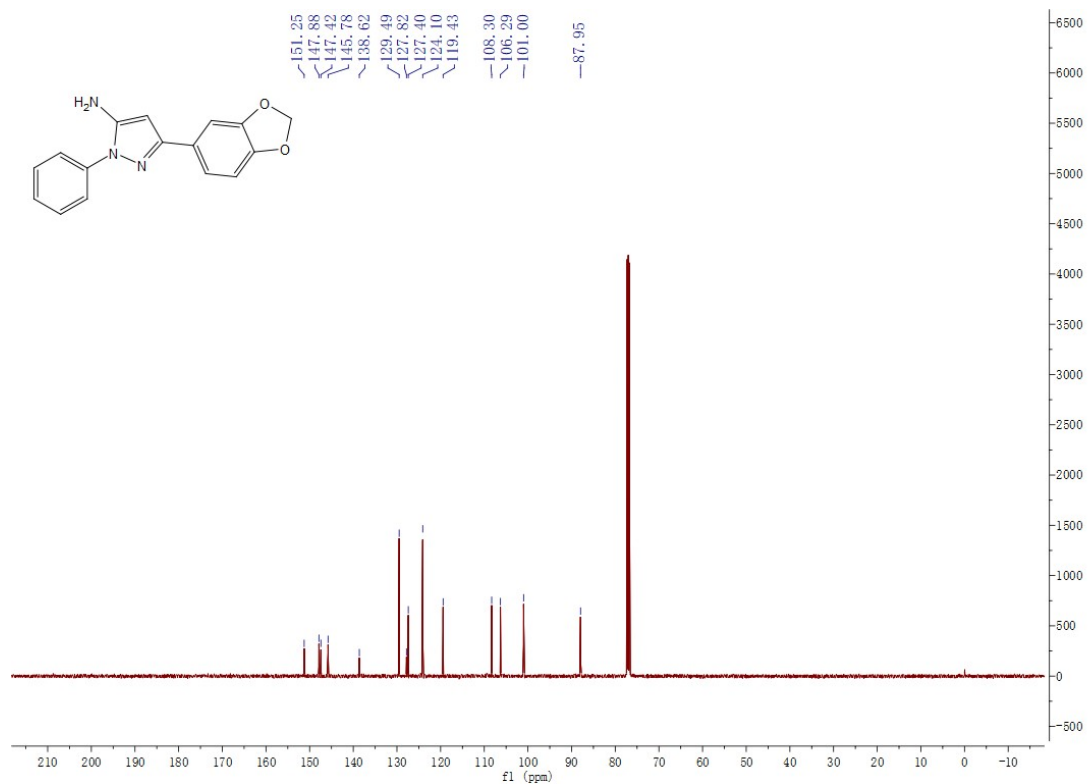

$^{13}\text{C}$  NMR (125 MHz,  $\text{CDCl}_3$ ) of compound 4s

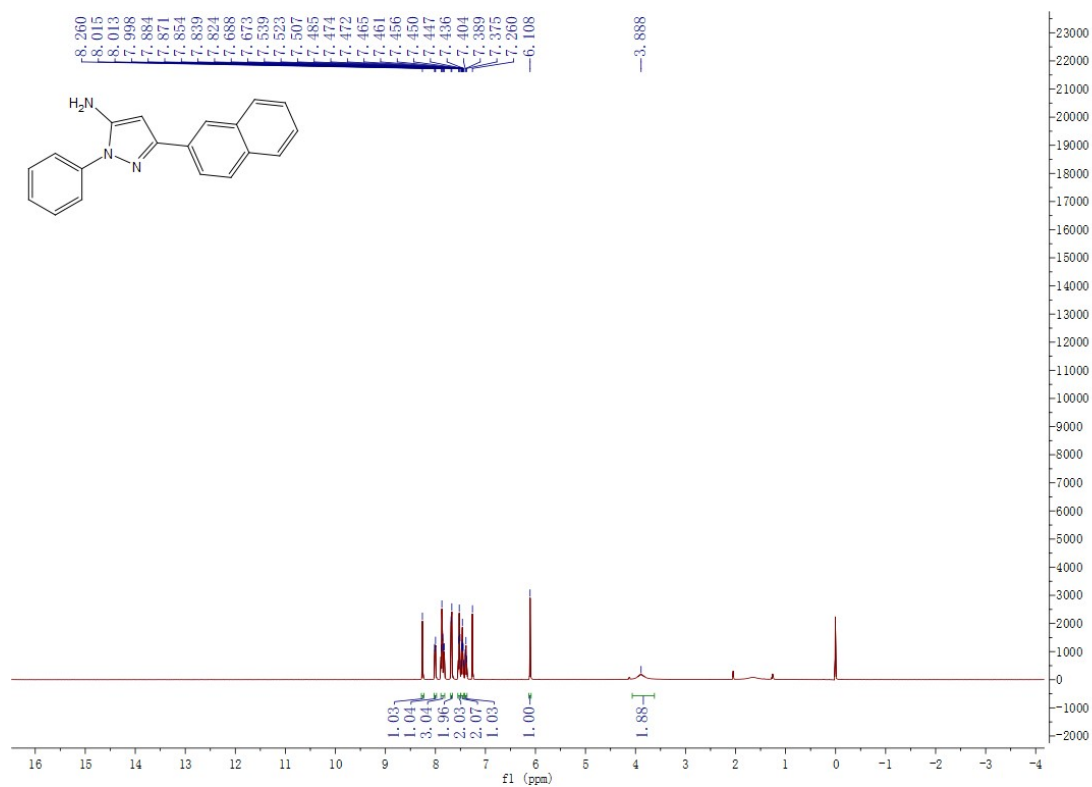

$^1\text{H}$  NMR (500 MHz,  $\text{CDCl}_3$ ) of compound 4t

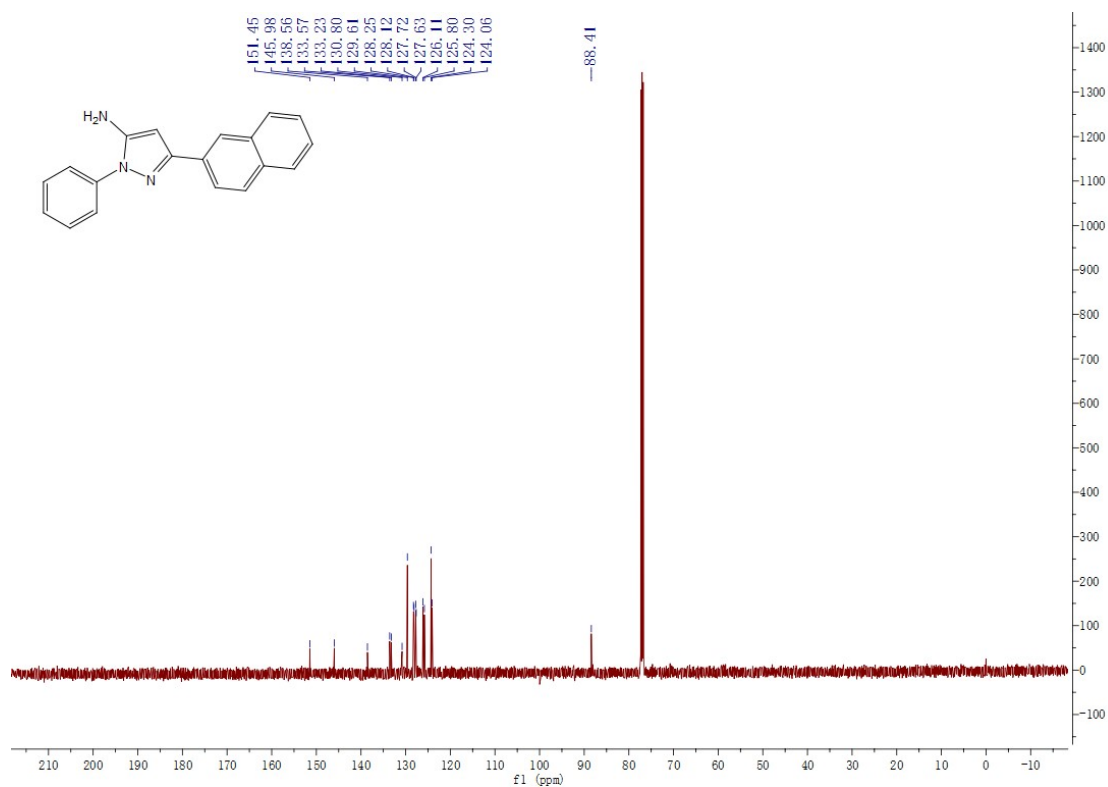

$^{13}\text{C}$  NMR (125 MHz,  $\text{CDCl}_3$ ) of compound **4t**

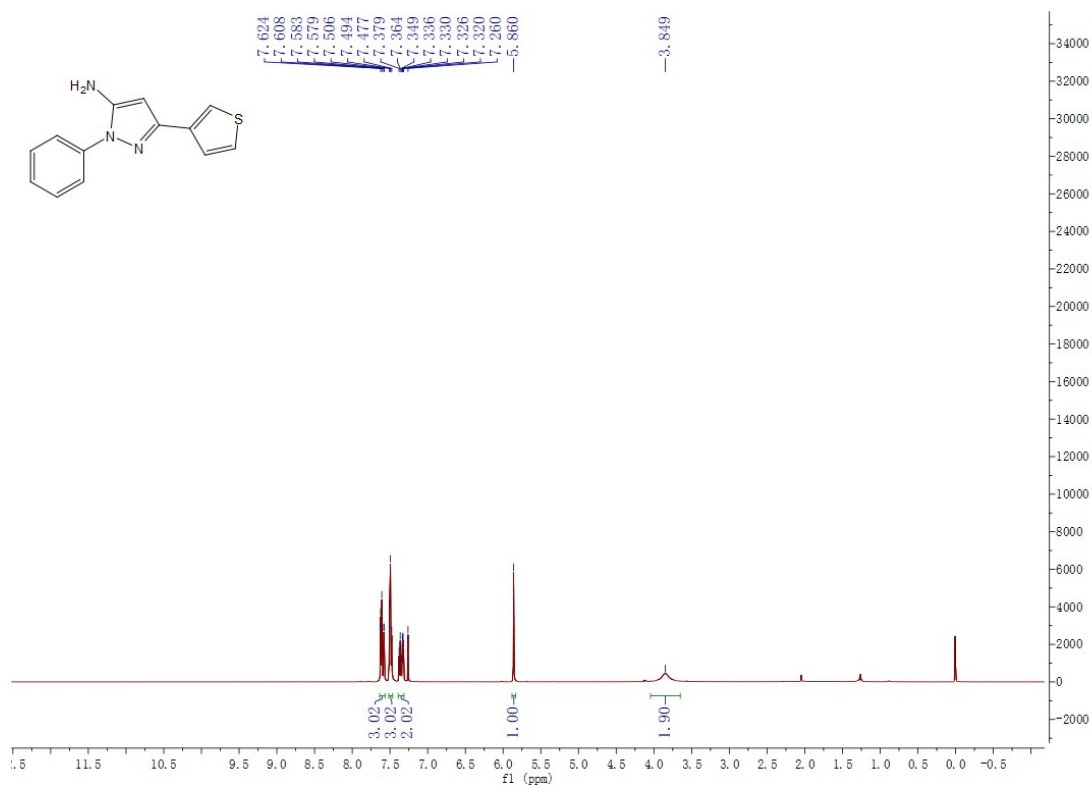

$^1\text{H}$  NMR (500 MHz,  $\text{CDCl}_3$ ) of compound **4u**

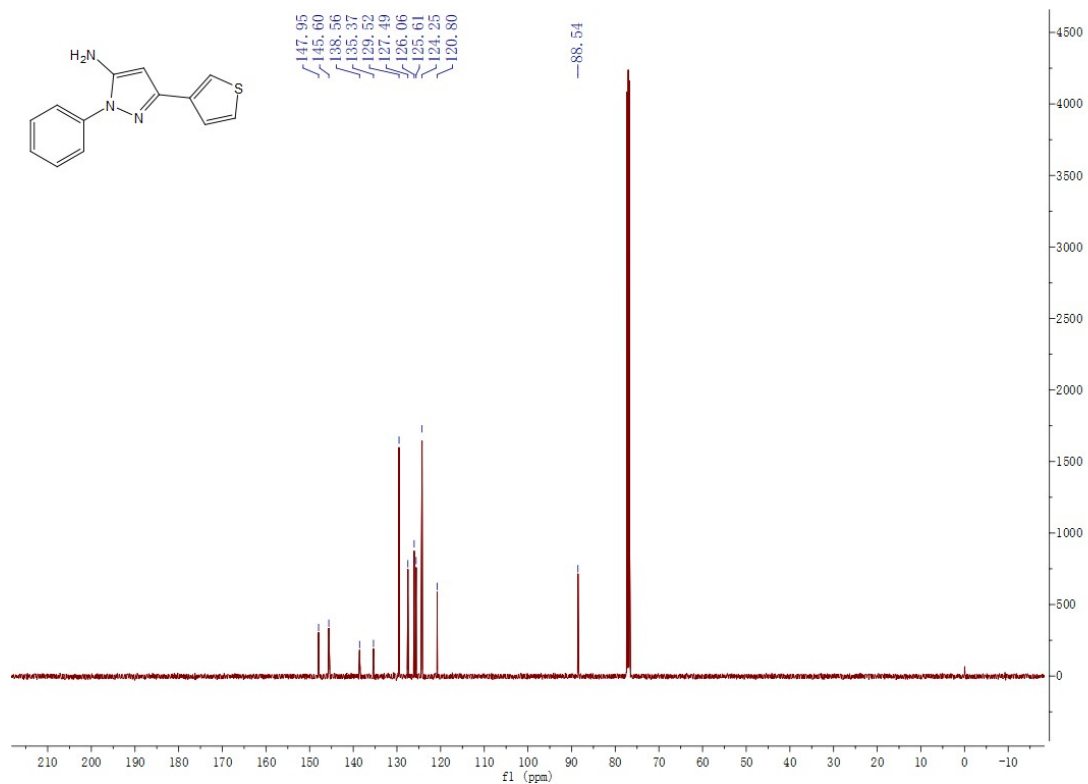

<sup>13</sup>C NMR (125 MHz, CDCl<sub>3</sub>) of compound 4u

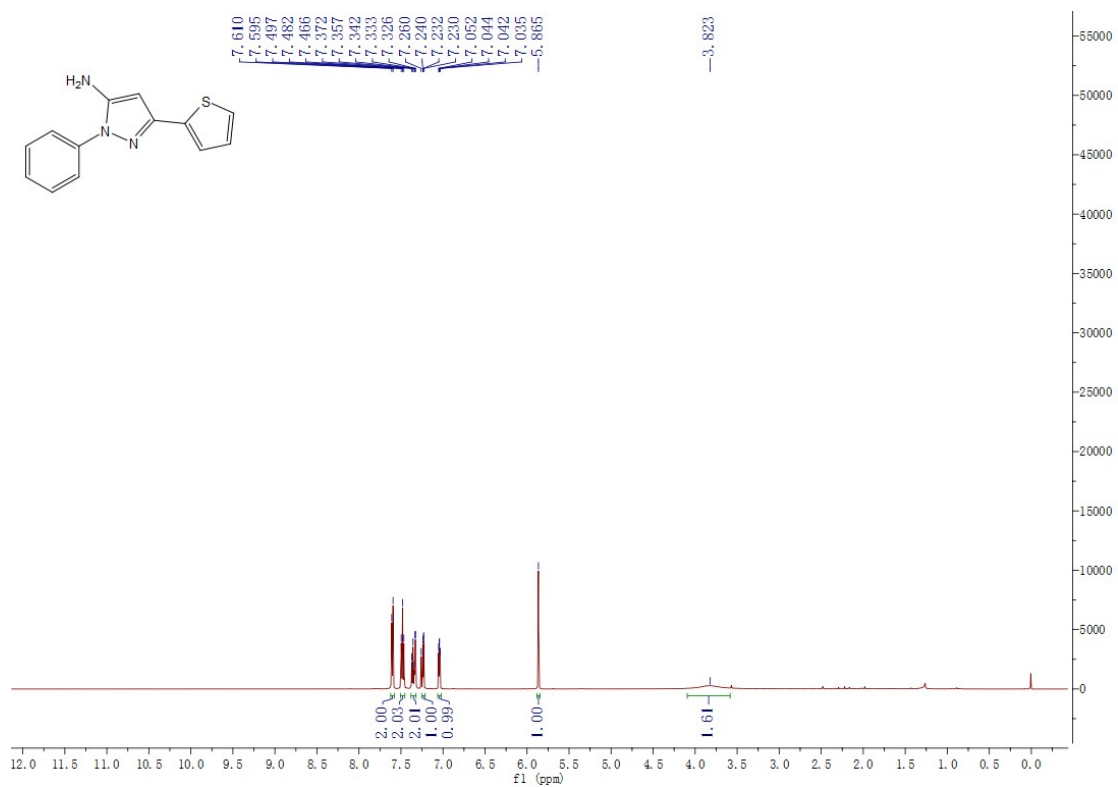

<sup>1</sup>H NMR (500 MHz, CDCl<sub>3</sub>) of compound 4v

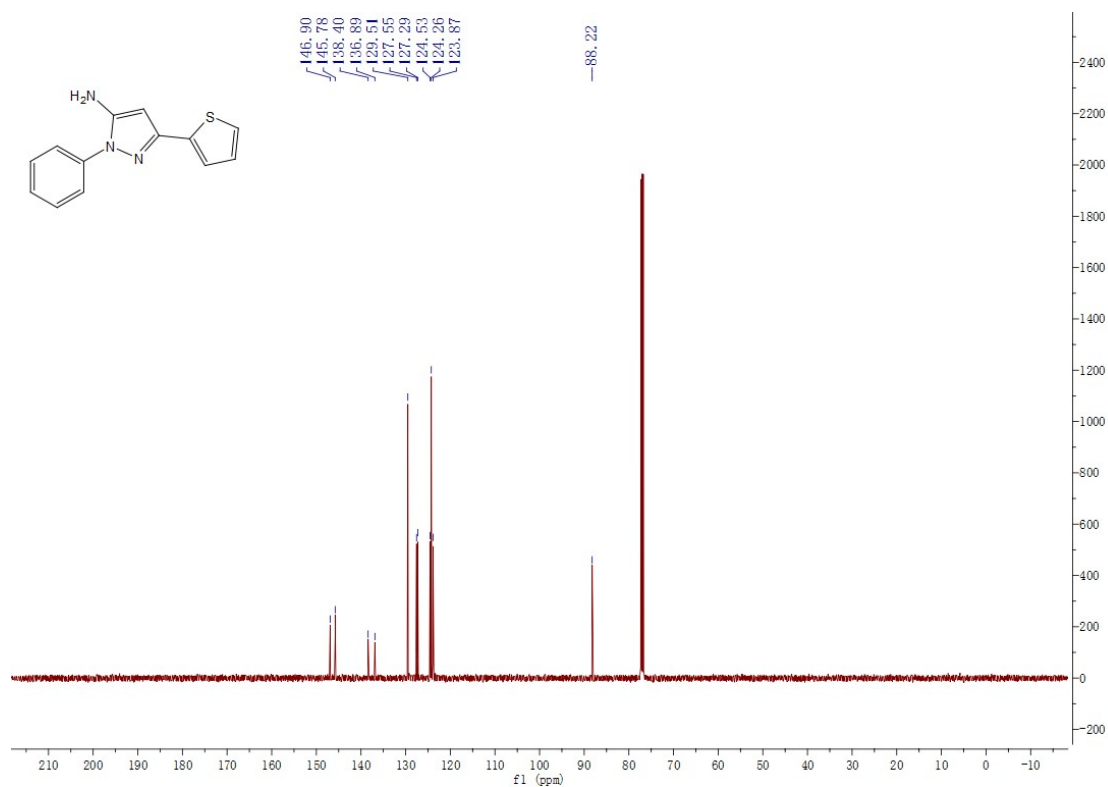

<sup>13</sup>C NMR (125 MHz, CDCl<sub>3</sub>) of compound 4v

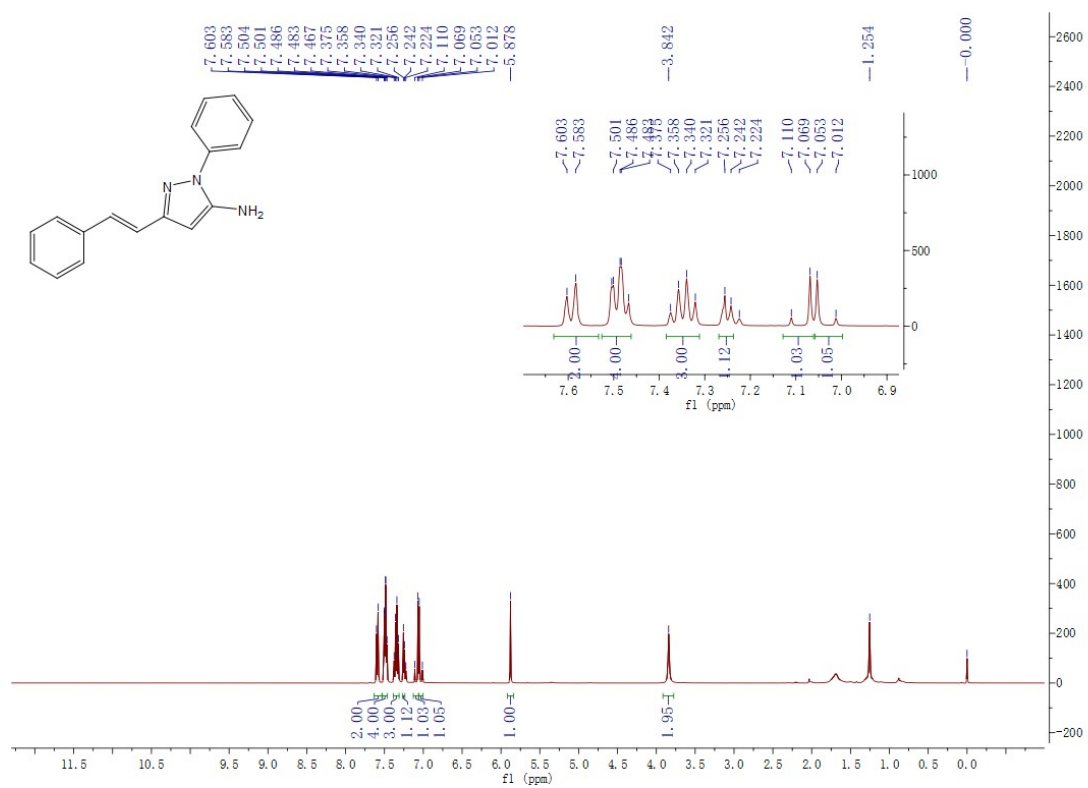

<sup>1</sup>H NMR (400 MHz, CDCl<sub>3</sub>) of compound 4w

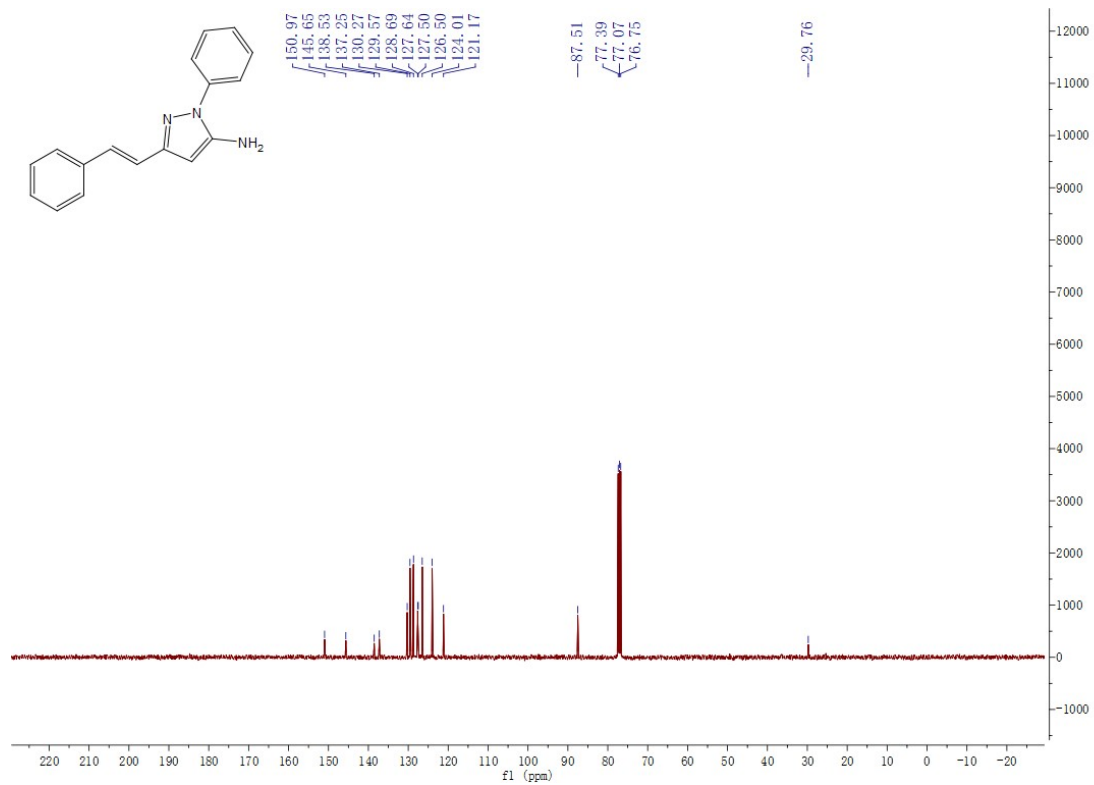

$^{13}\text{C}$  NMR (101 MHz,  $\text{CDCl}_3$ ) of compound **4w**

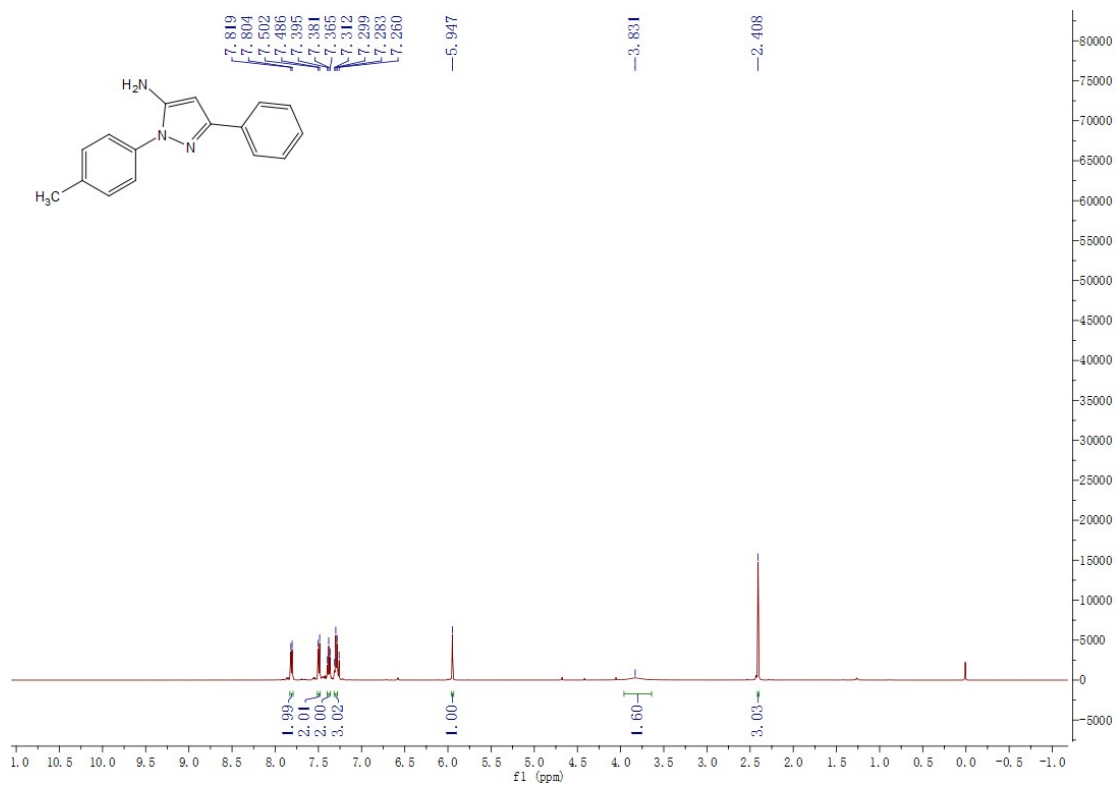

$^1\text{H}$  NMR (500 MHz,  $\text{CDCl}_3$ ) of compound **5a**

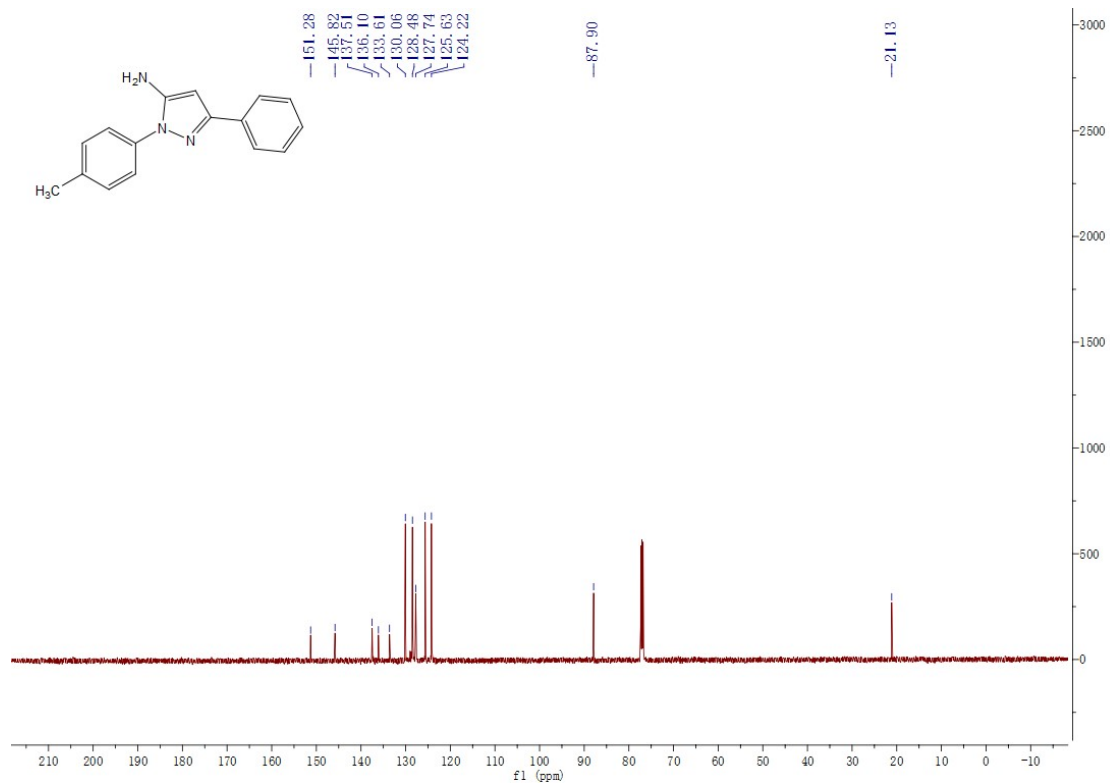

$^{13}\text{C}$  NMR (125 MHz,  $\text{CDCl}_3$ ) of compound **5a**

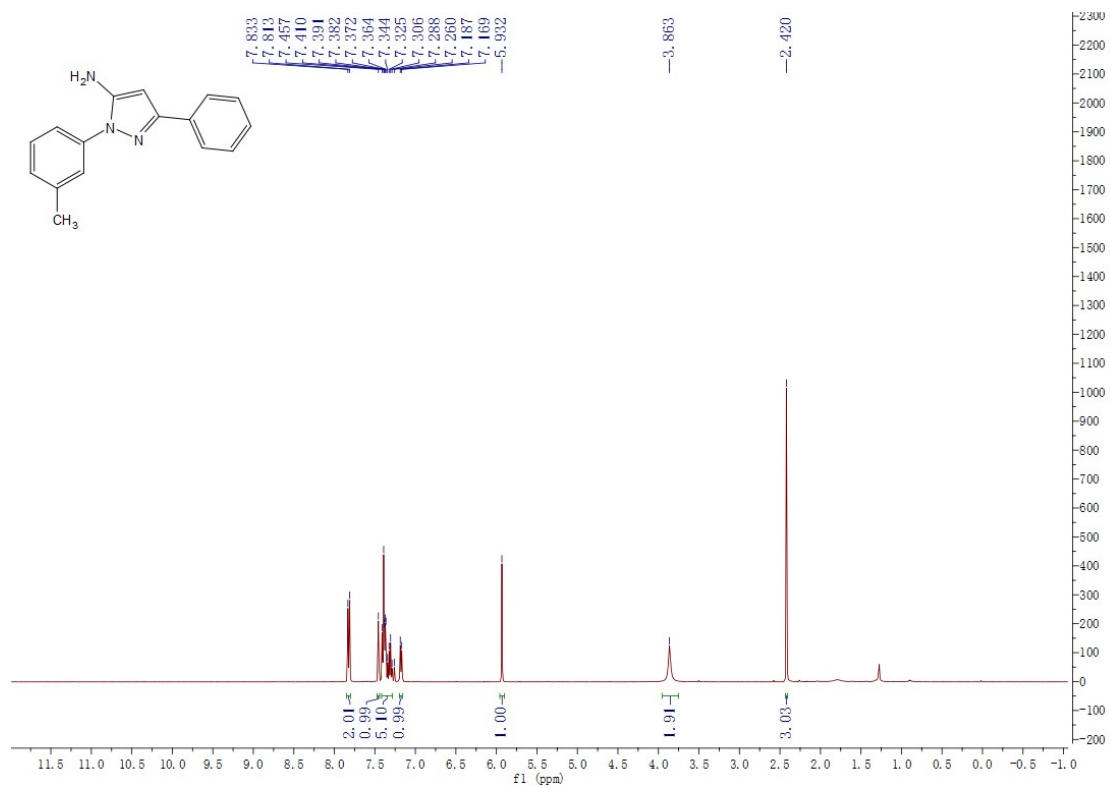

$^1\text{H}$  NMR (400 MHz,  $\text{CDCl}_3$ ) of compound **5b**



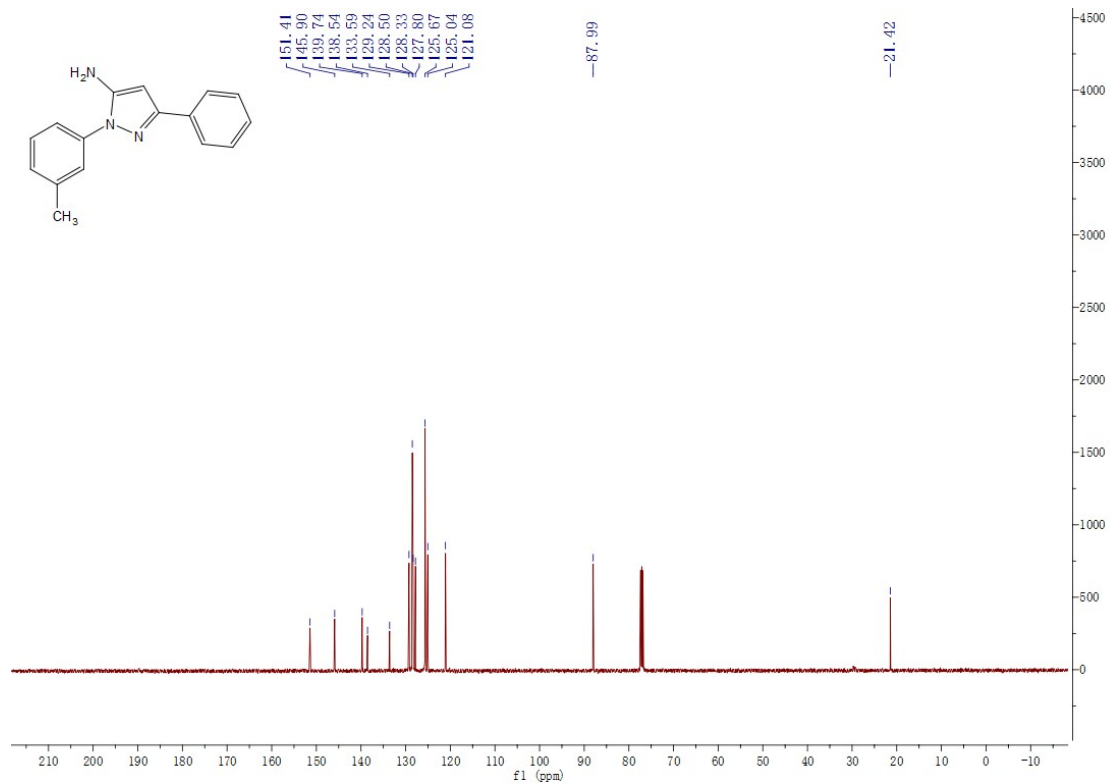

$^{13}\text{C}$  NMR (101 MHz,  $\text{CDCl}_3$ ) of compound **5b**

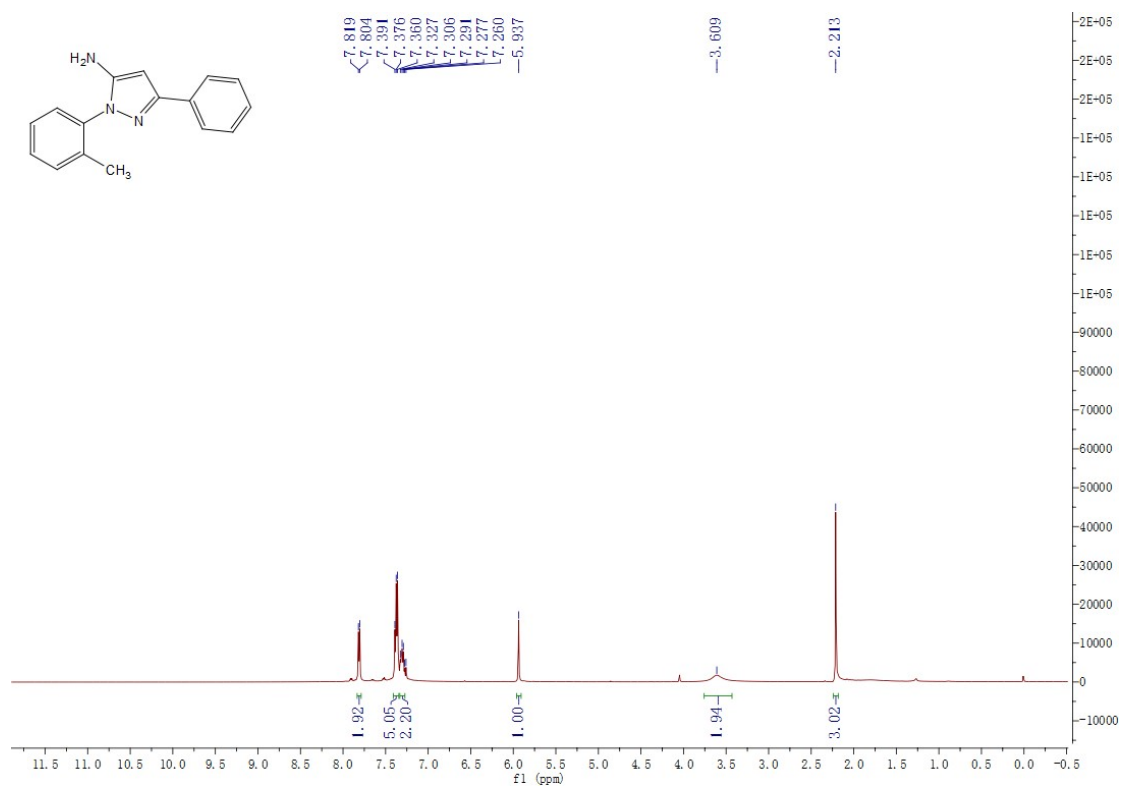

$^1\text{H}$  NMR (500 MHz,  $\text{CDCl}_3$ ) of compound **5c**

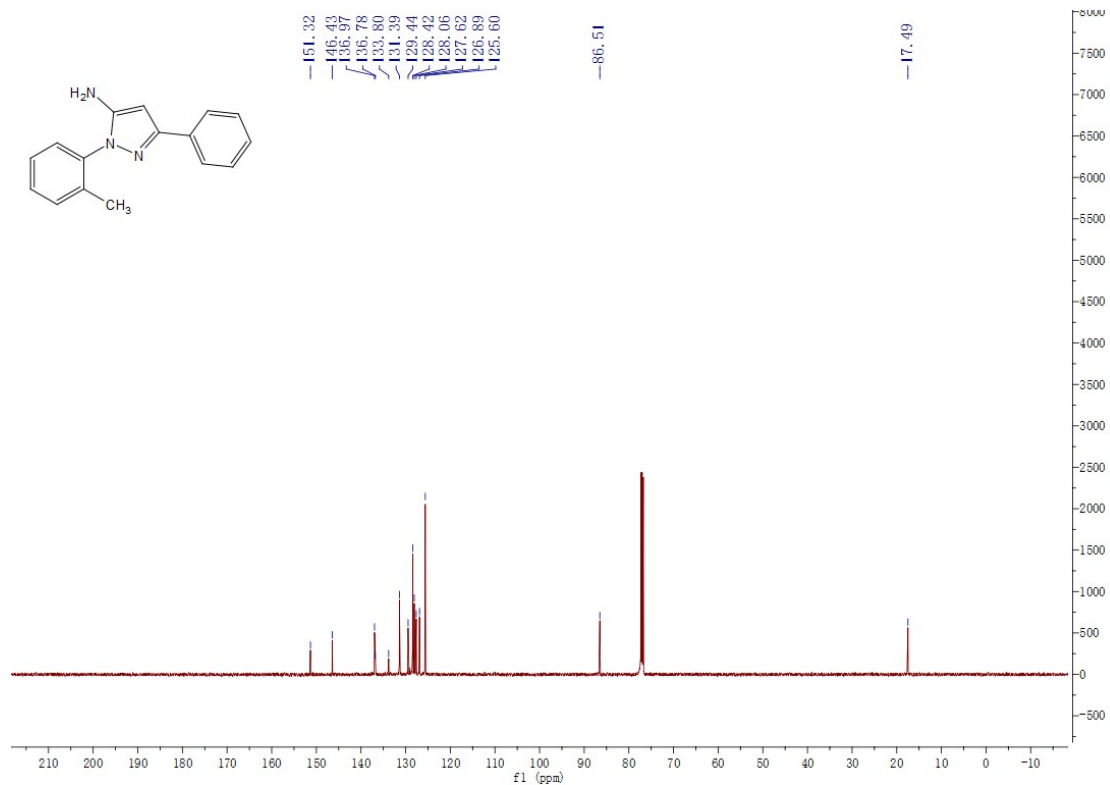

$^{13}\text{C}$  NMR (125 MHz,  $\text{CDCl}_3$ ) of compound **5c**

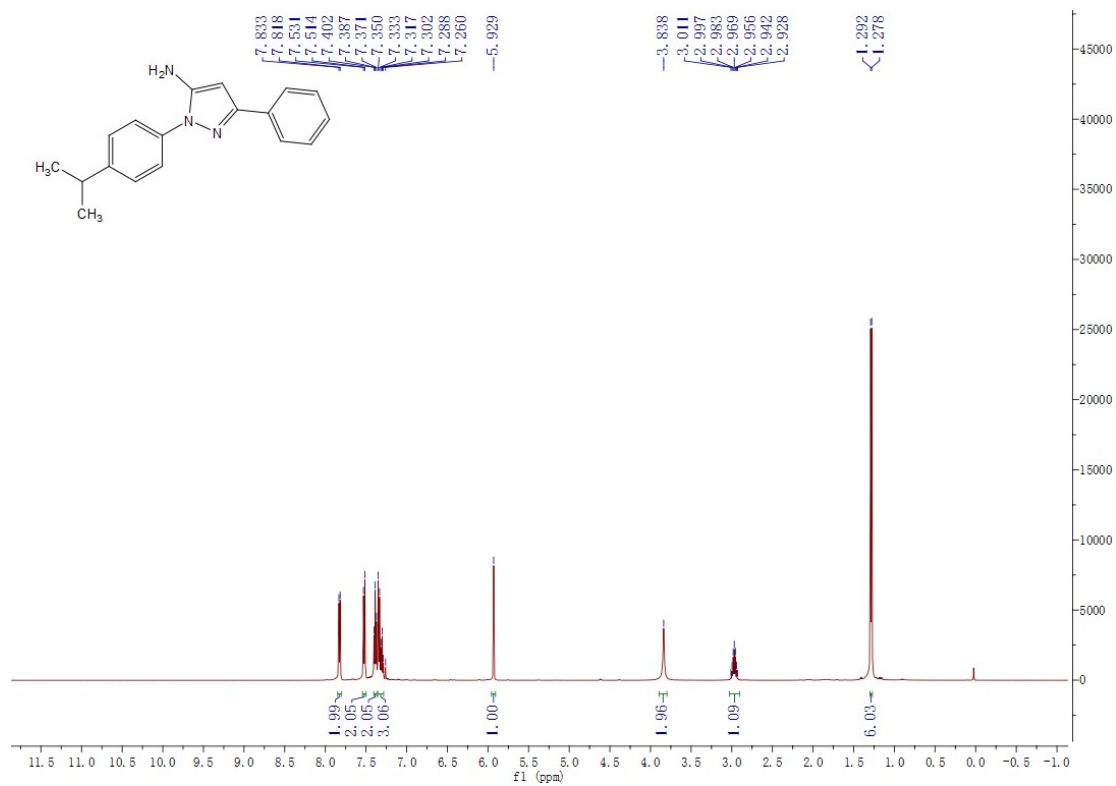

$^1\text{H}$  NMR (500 MHz,  $\text{CDCl}_3$ ) of compound **5d**

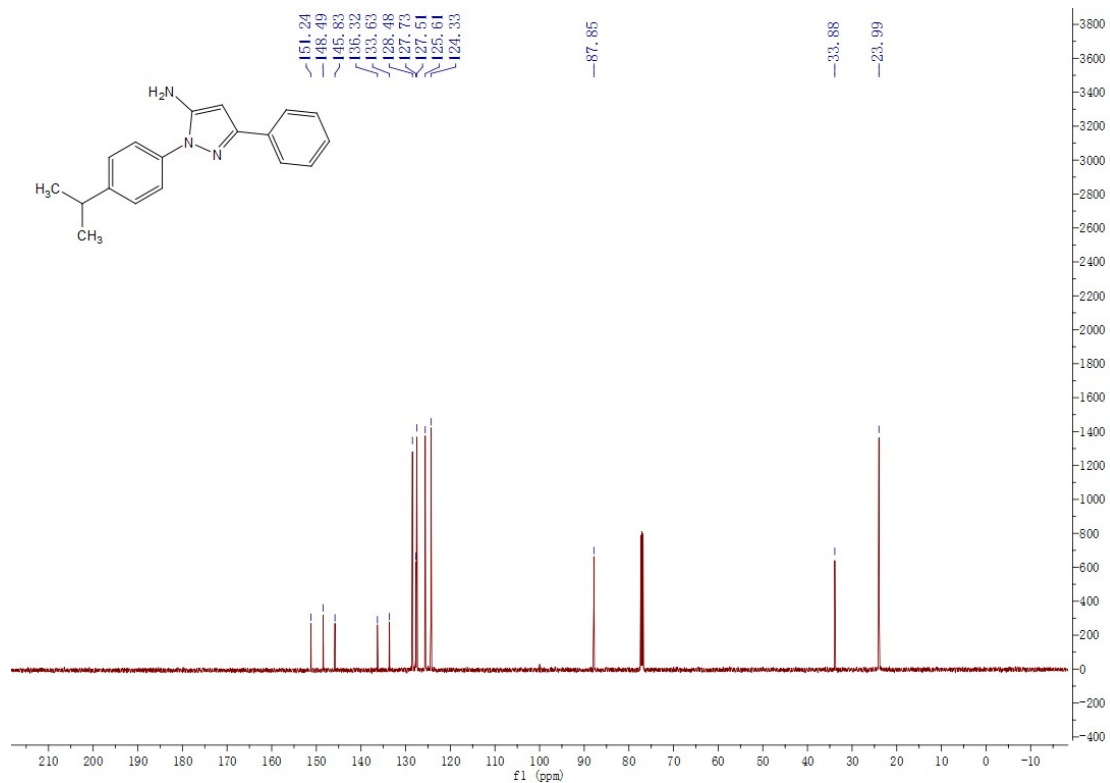

$^{13}\text{C}$  NMR (125 MHz,  $\text{CDCl}_3$ ) of compound **5d**

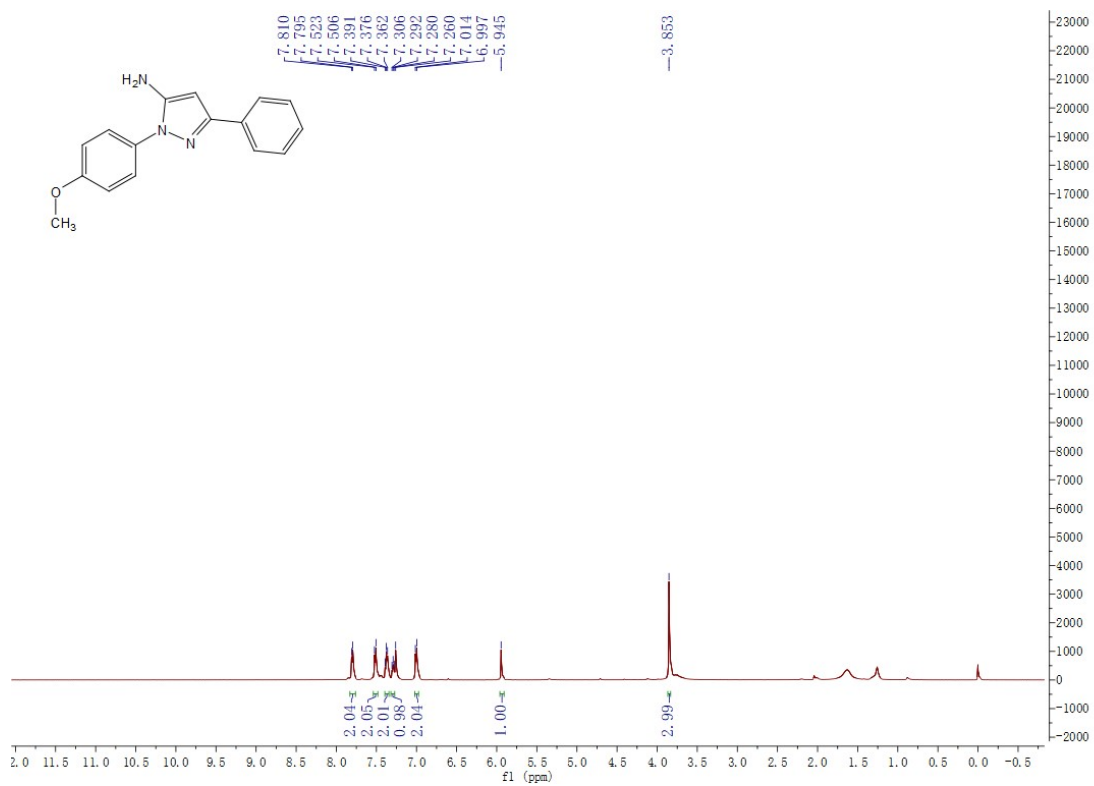

$^1\text{H}$  NMR (500 MHz,  $\text{CDCl}_3$ ) of compound **5e**

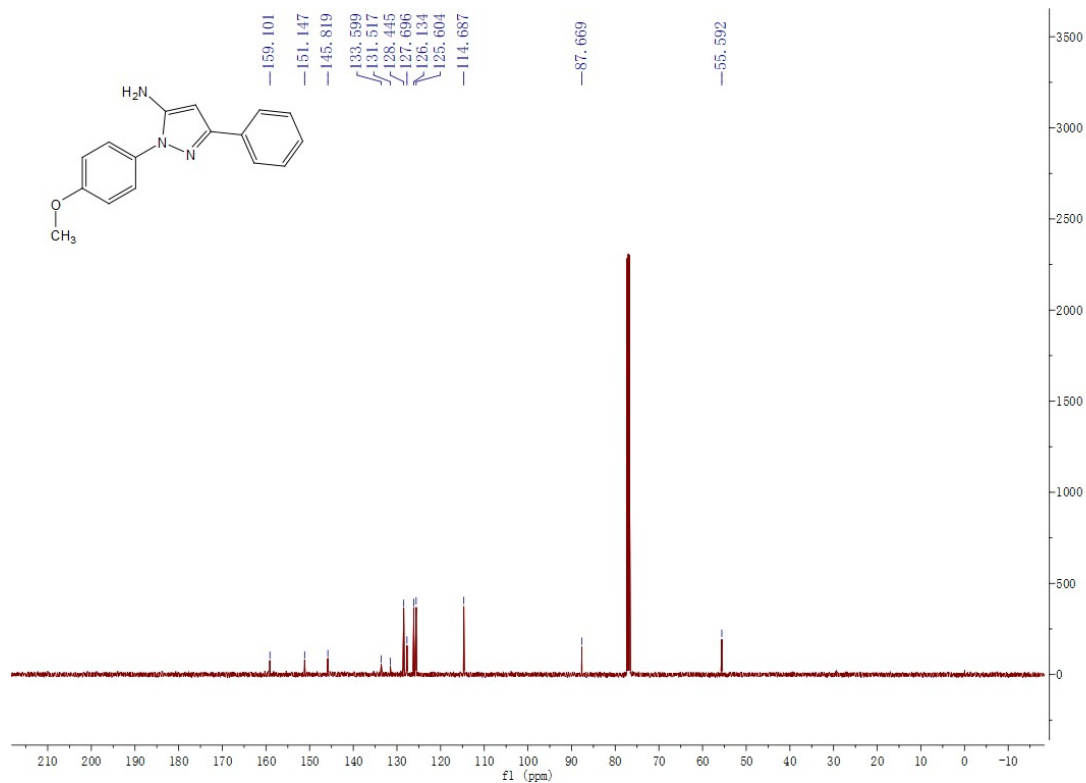

$^{13}\text{C}$  NMR (125 MHz,  $\text{CDCl}_3$ ) of compound **5e**

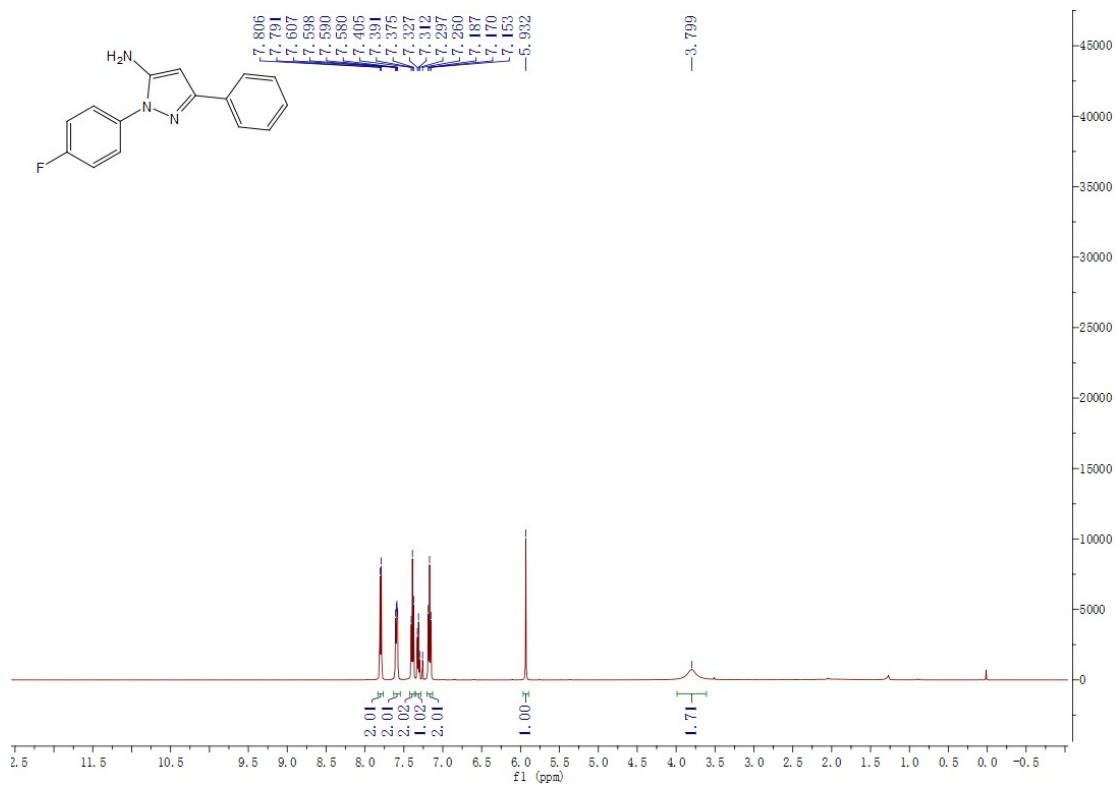

$^1\text{H}$  NMR (500 MHz,  $\text{CDCl}_3$ ) of compound **5f**

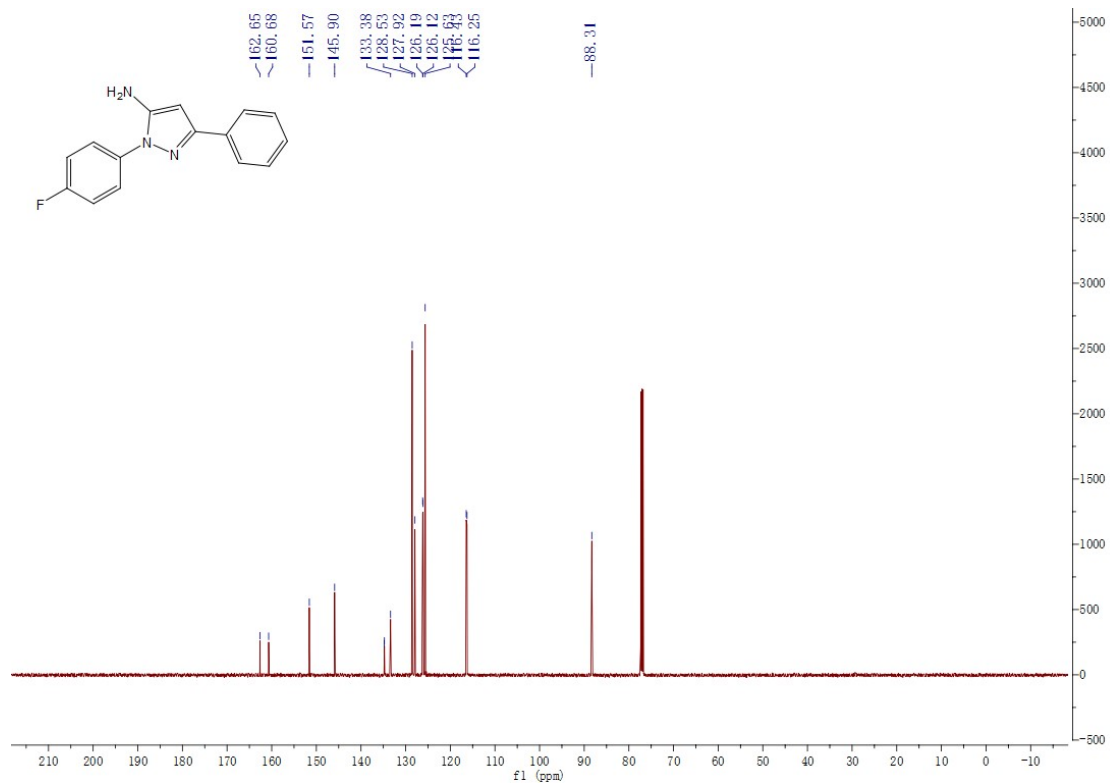

$^{13}\text{C}$  NMR (125 MHz,  $\text{CDCl}_3$ ) of compound **5f**

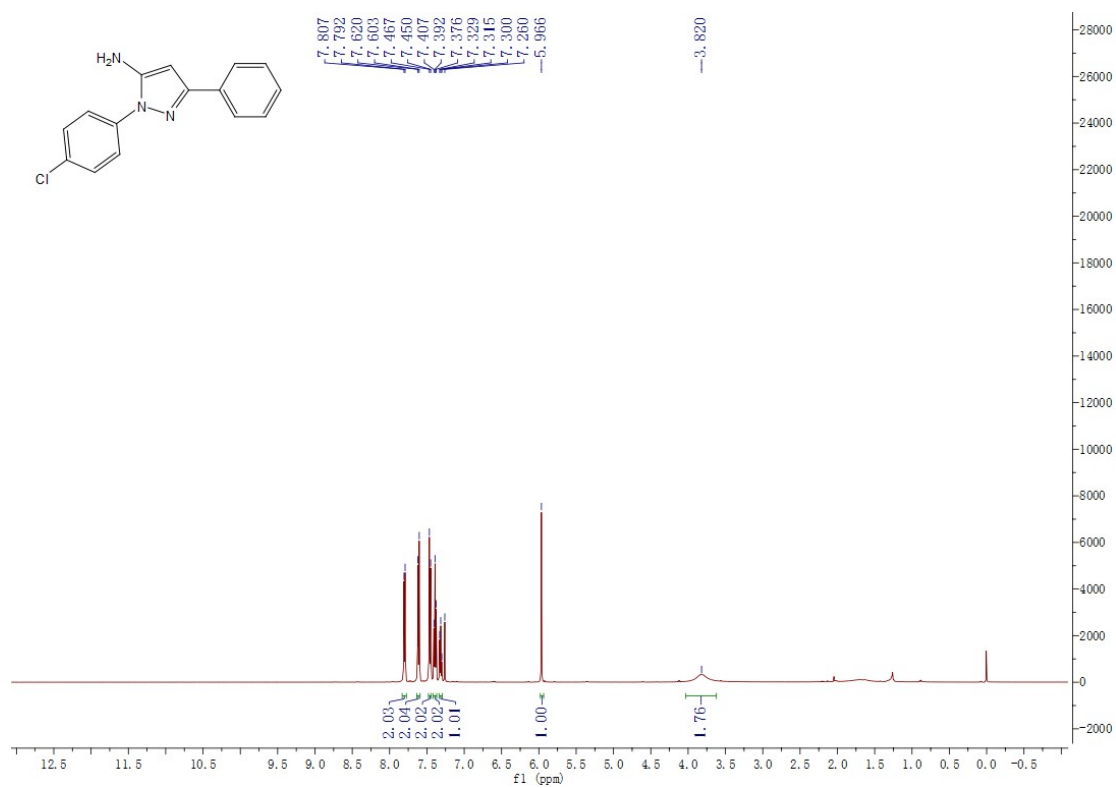

$^1\text{H}$  NMR (500 MHz,  $\text{CDCl}_3$ ) of compound **5g**

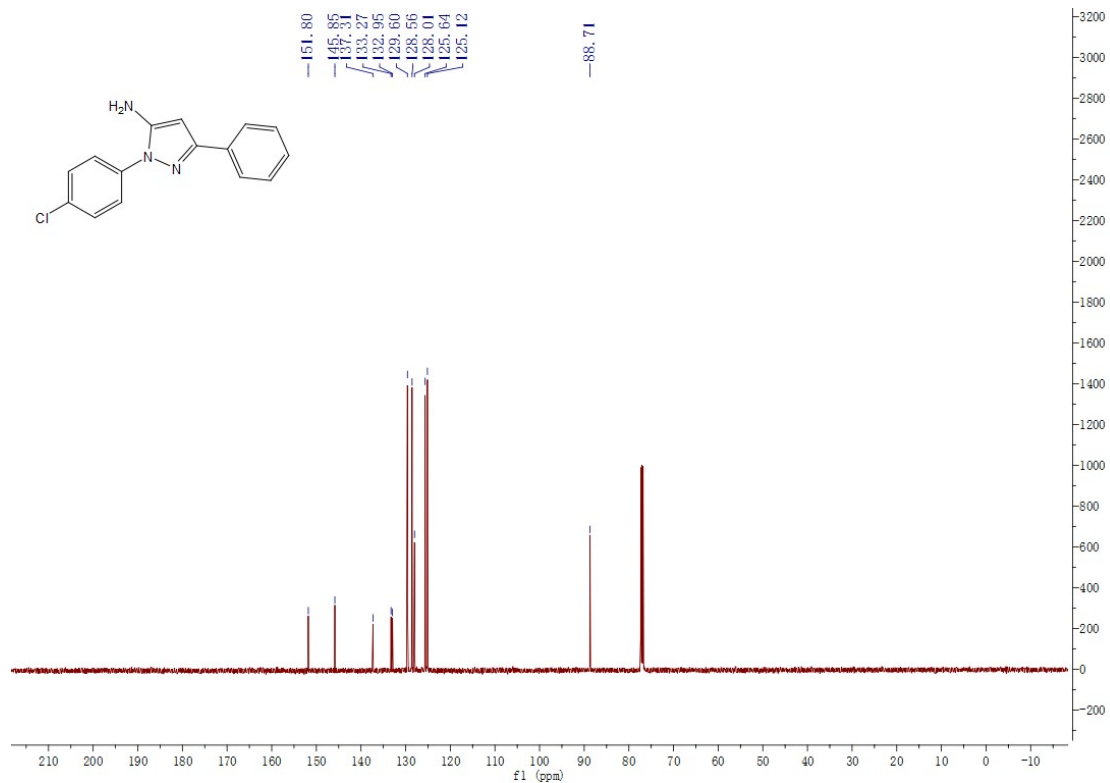

$^{13}\text{C}$  NMR (125 MHz,  $\text{CDCl}_3$ ) of compound **5g**

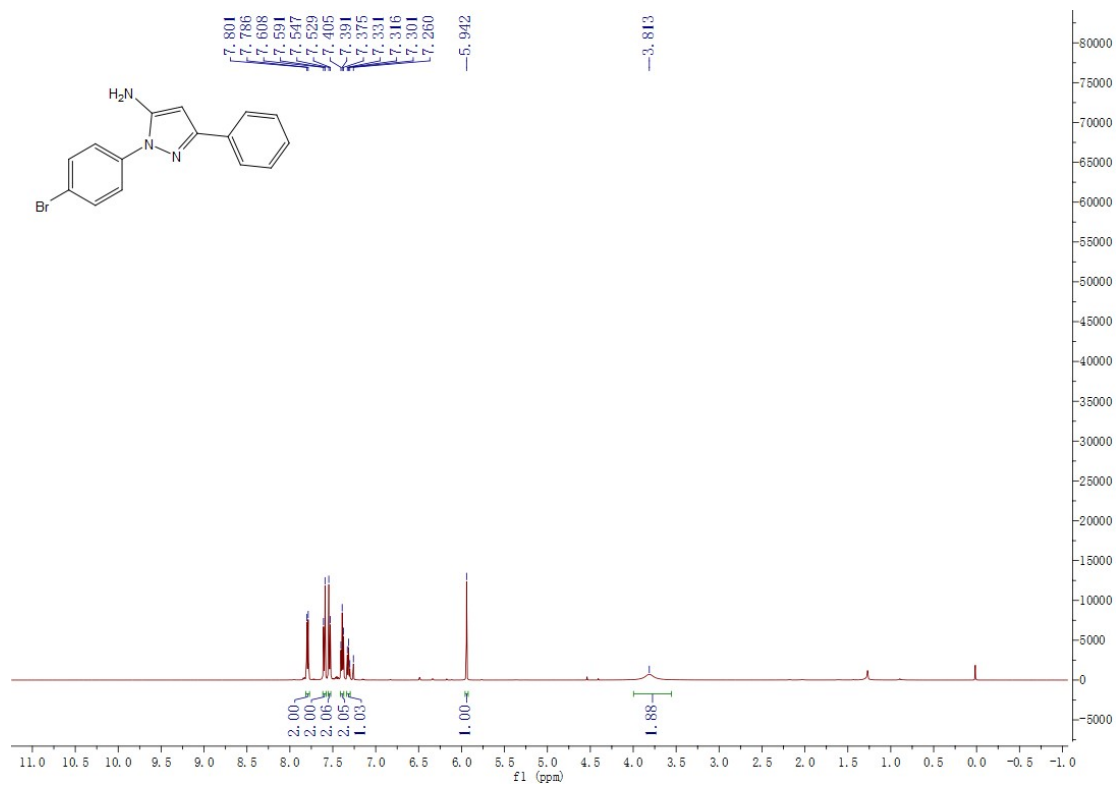

$^1\text{H}$  NMR (500 MHz,  $\text{CDCl}_3$ ) of compound **5h**

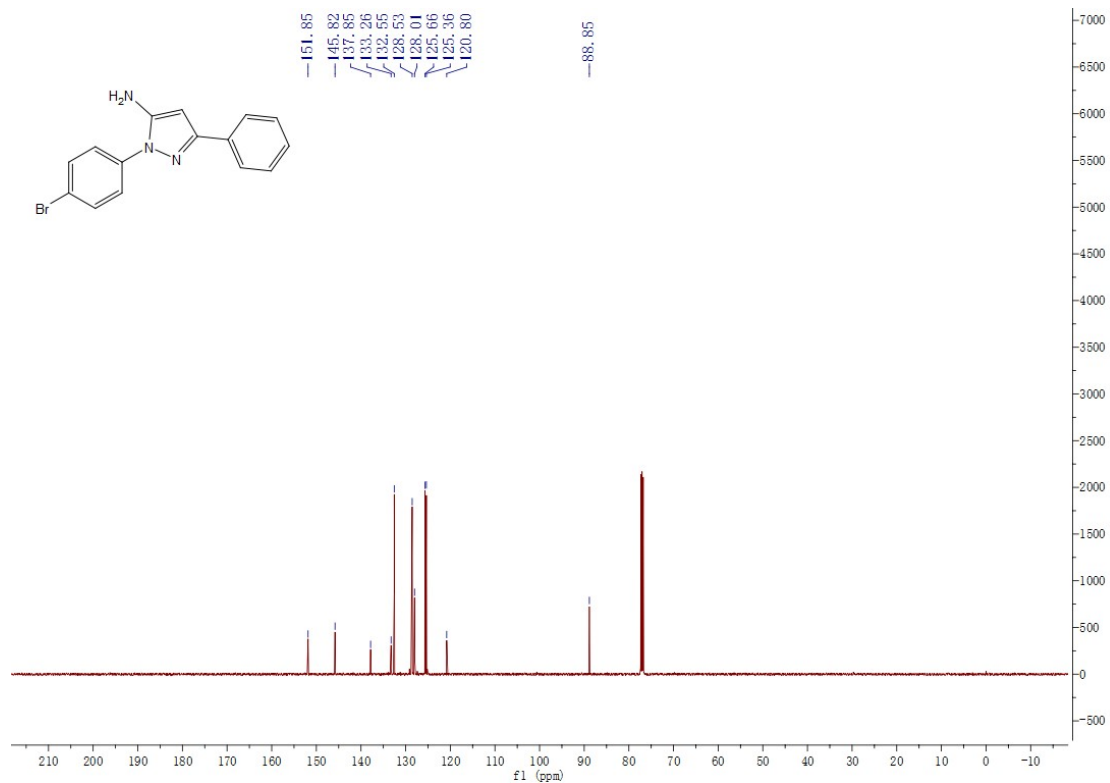

$^{13}\text{C}$  NMR (125 MHz,  $\text{CDCl}_3$ ) of compound **5h**

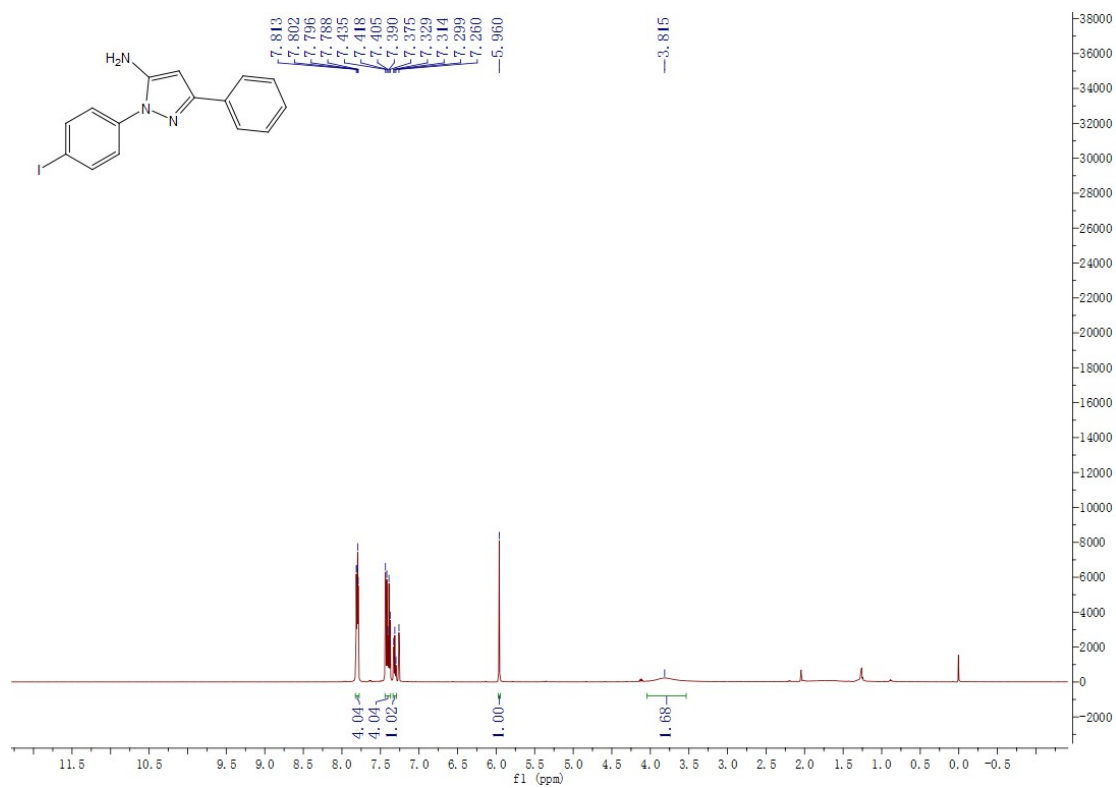

$^1\text{H}$  NMR (500 MHz,  $\text{CDCl}_3$ ) of compound **5i**

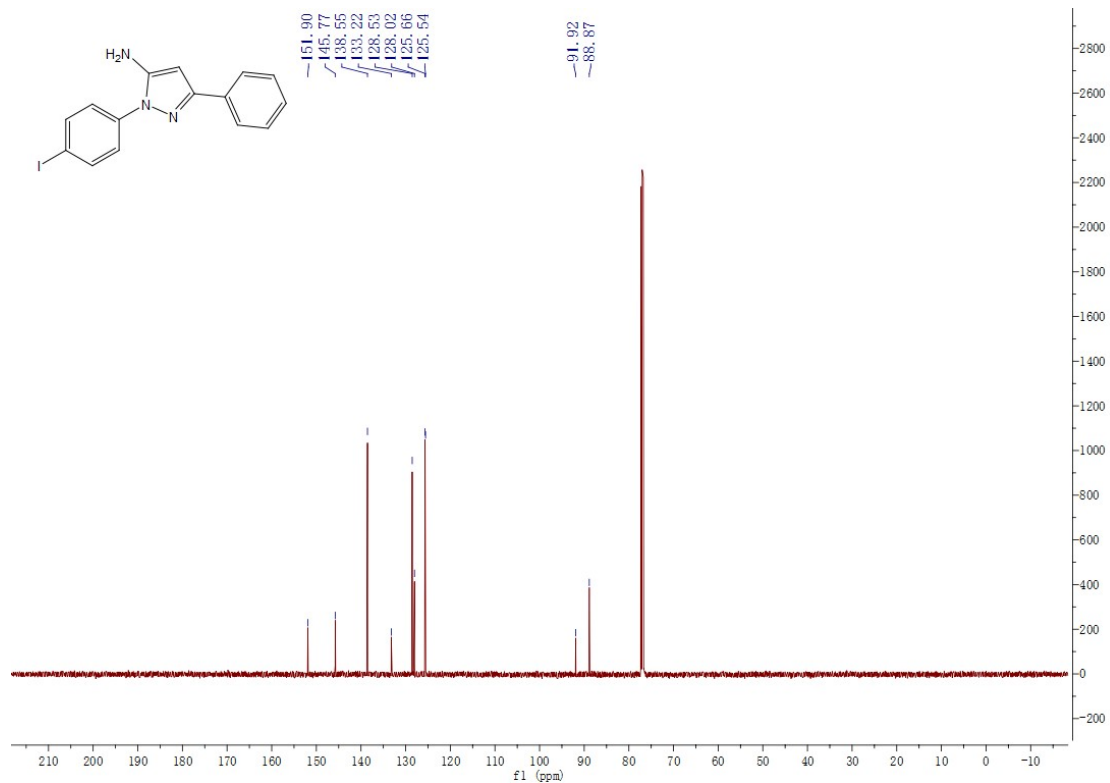

$^{13}\text{C}$  NMR (125 MHz,  $\text{CDCl}_3$ ) of compound **5i**

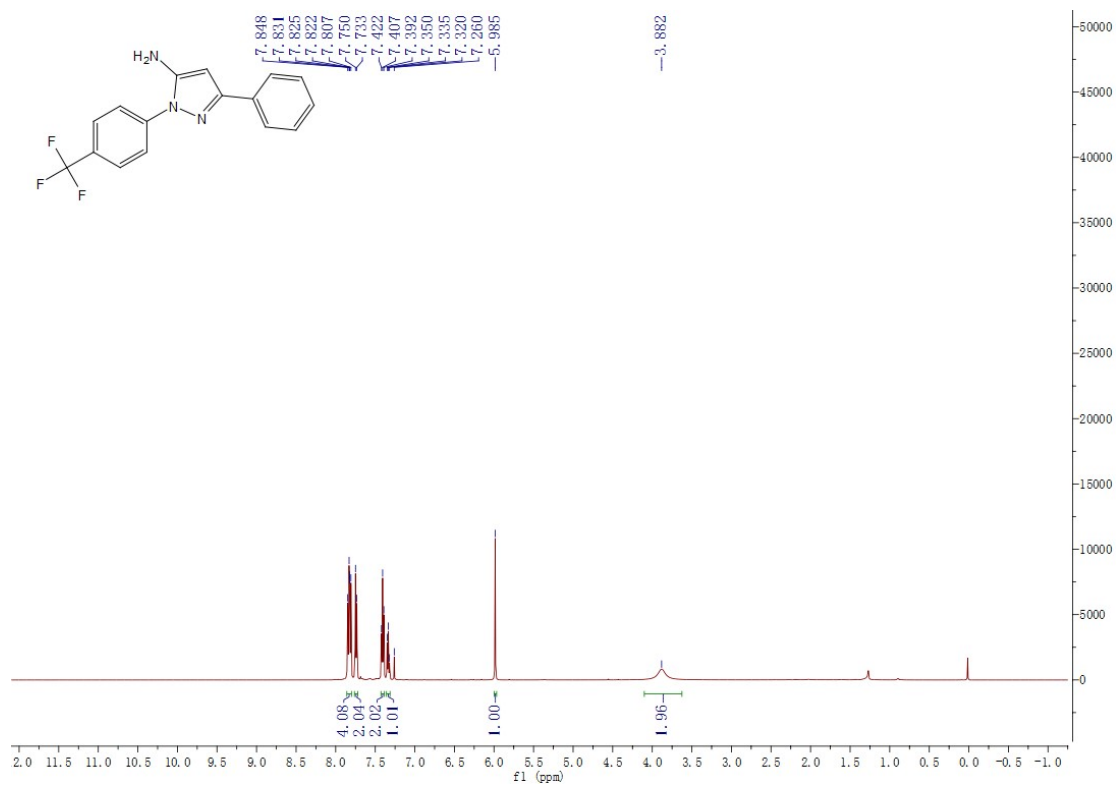

$^1\text{H}$  NMR (500 MHz,  $\text{CDCl}_3$ ) of compound **5j**



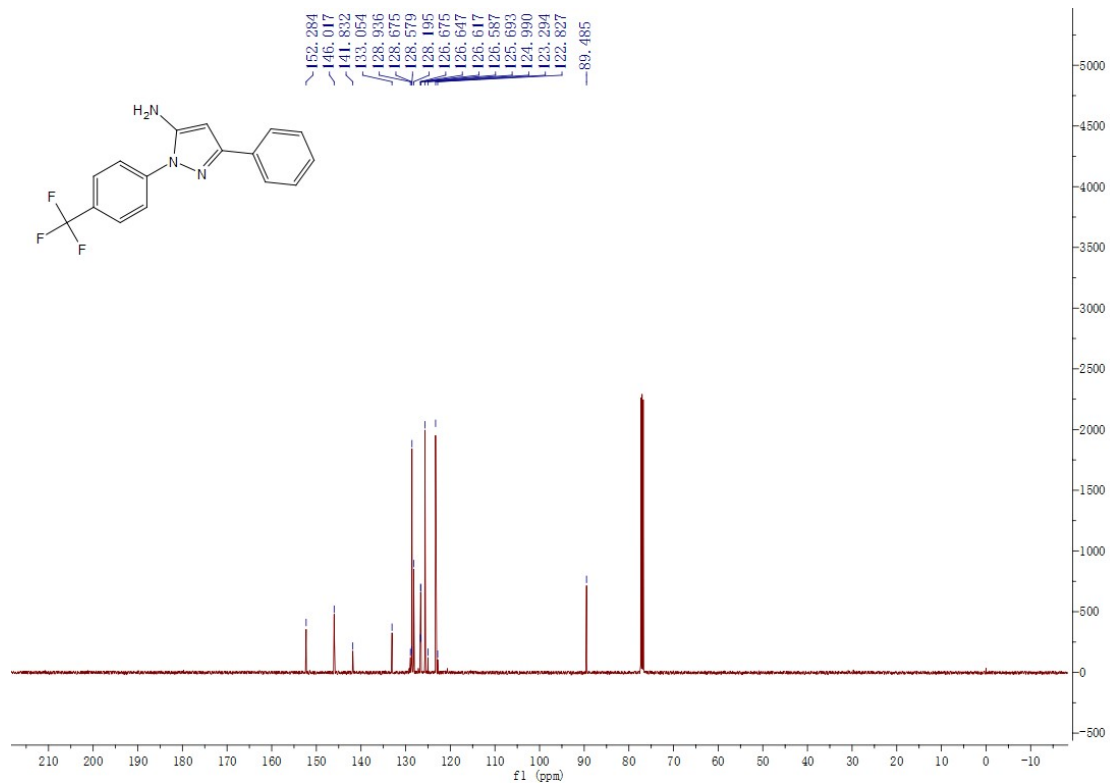

$^{13}\text{C}$  NMR (125 MHz,  $\text{CDCl}_3$ ) of compound **5j**

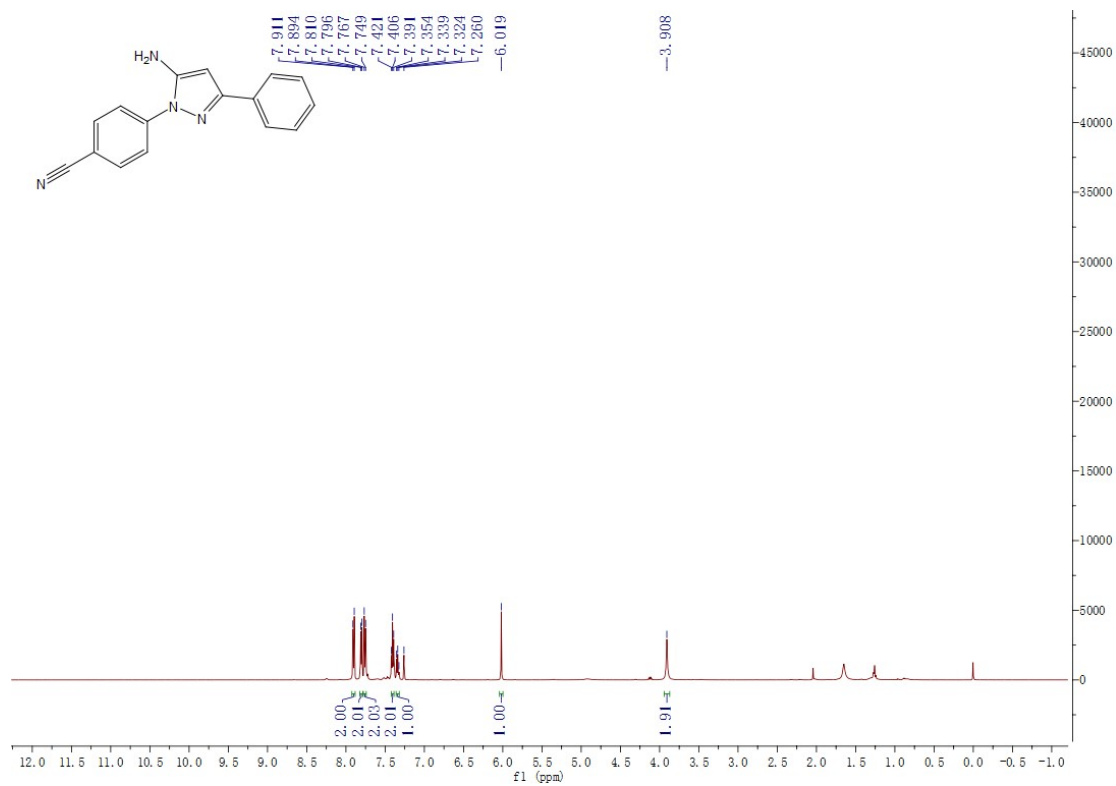

$^1\text{H}$  NMR (500 MHz,  $\text{CDCl}_3$ ) of compound **5k**

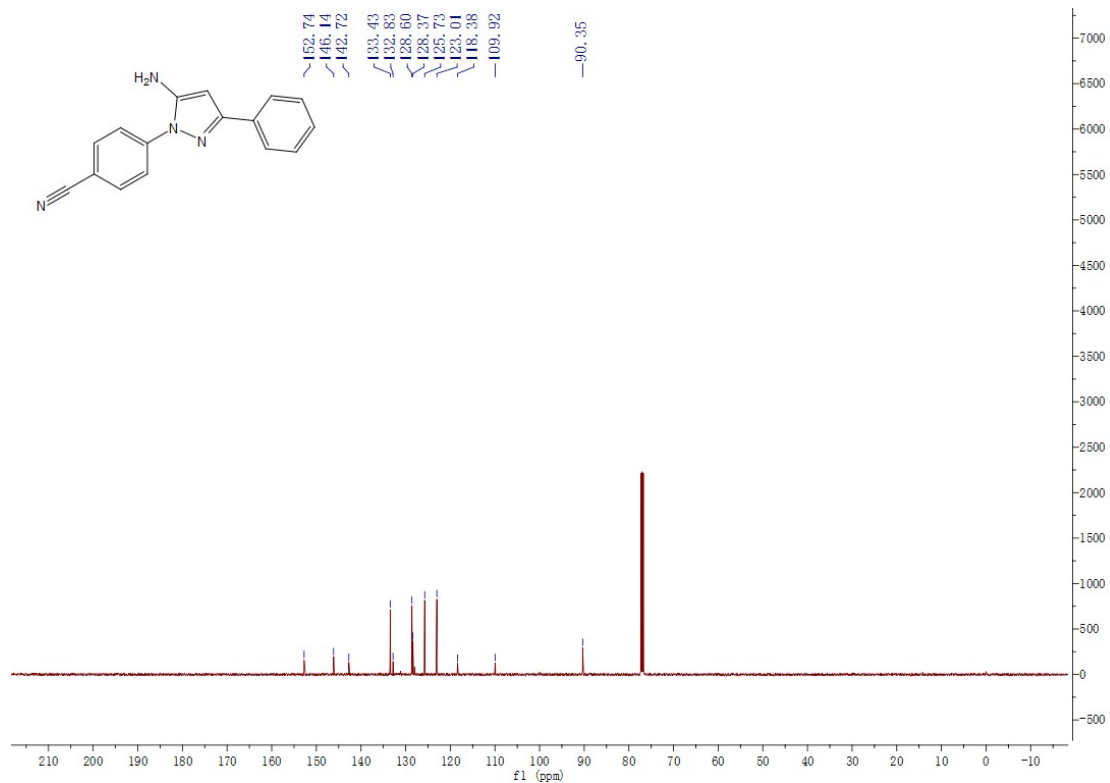

$^{13}\text{C}$  NMR (125 MHz,  $\text{CDCl}_3$ ) of compound **5k**

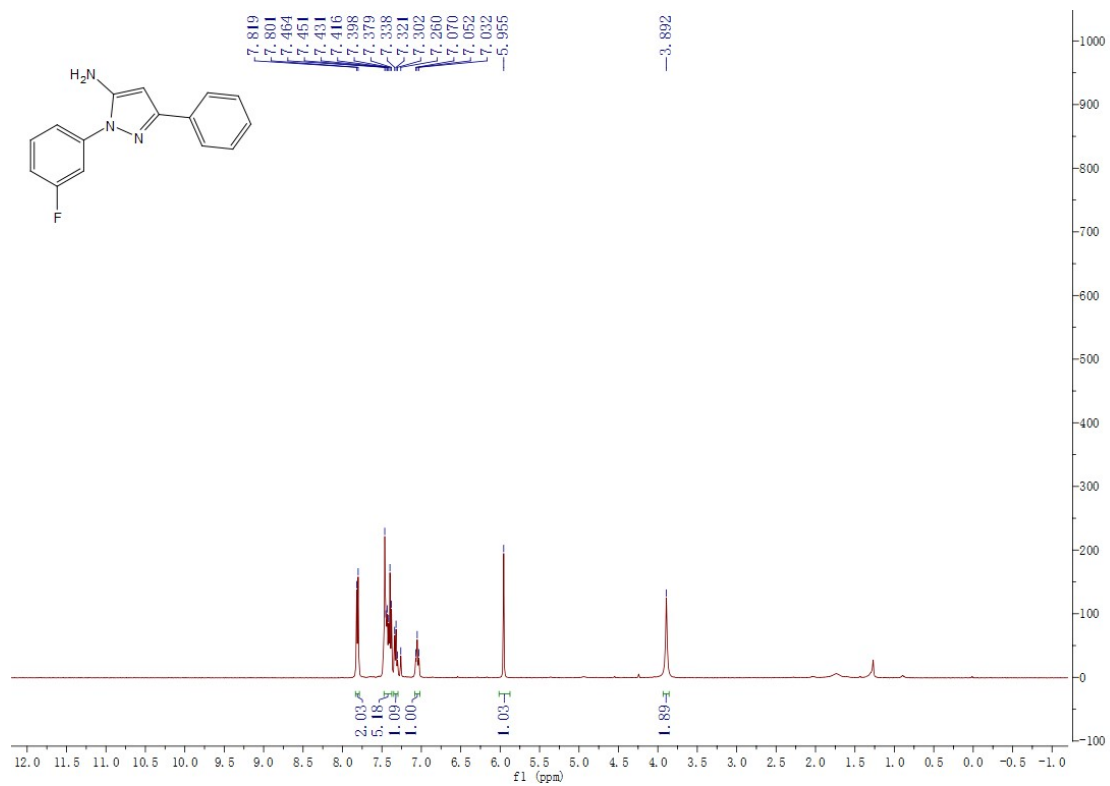

$^1\text{H}$  NMR (400 MHz,  $\text{CDCl}_3$ ) of compound **5l**

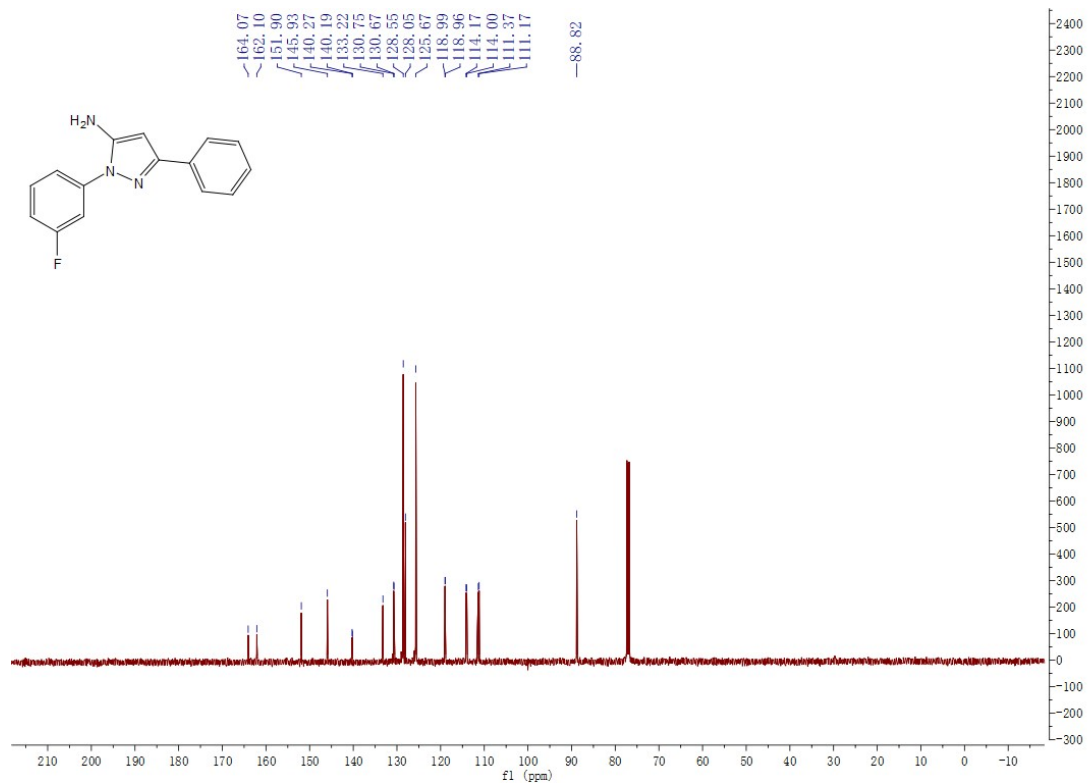

<sup>13</sup>C NMR (101 MHz, CDCl<sub>3</sub>) of compound **5l**

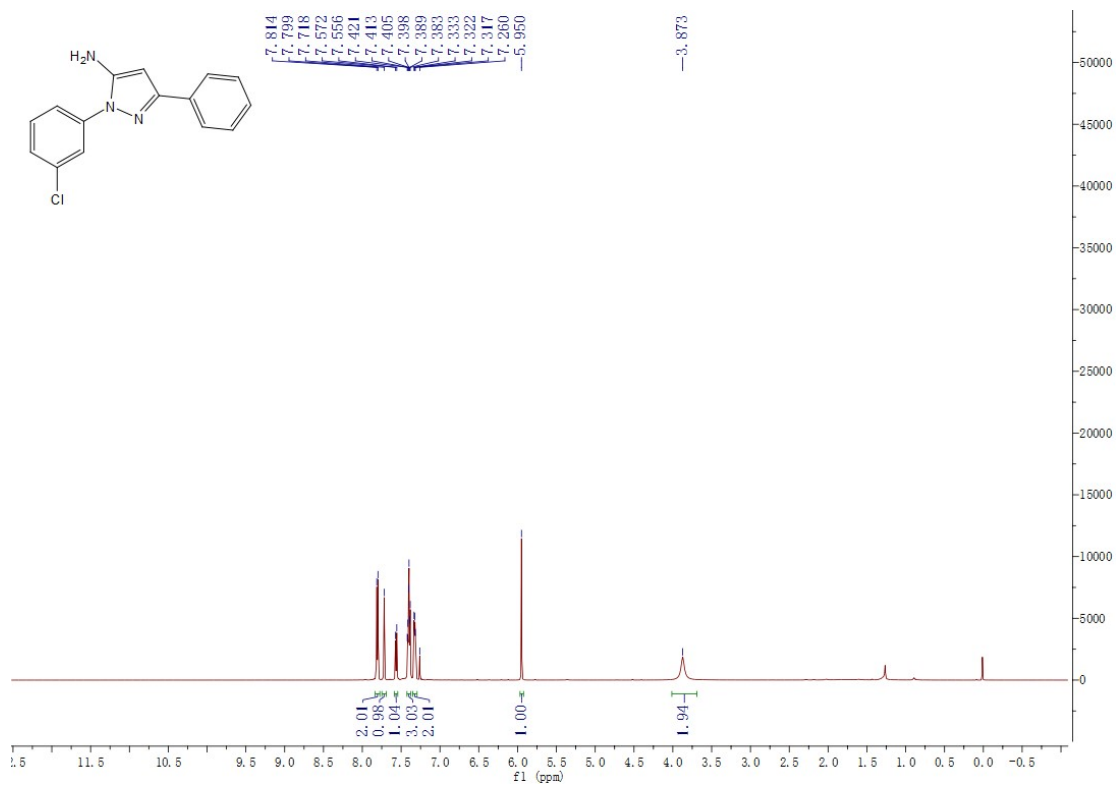

<sup>1</sup>H NMR (500 MHz, CDCl<sub>3</sub>) of compound **5m**

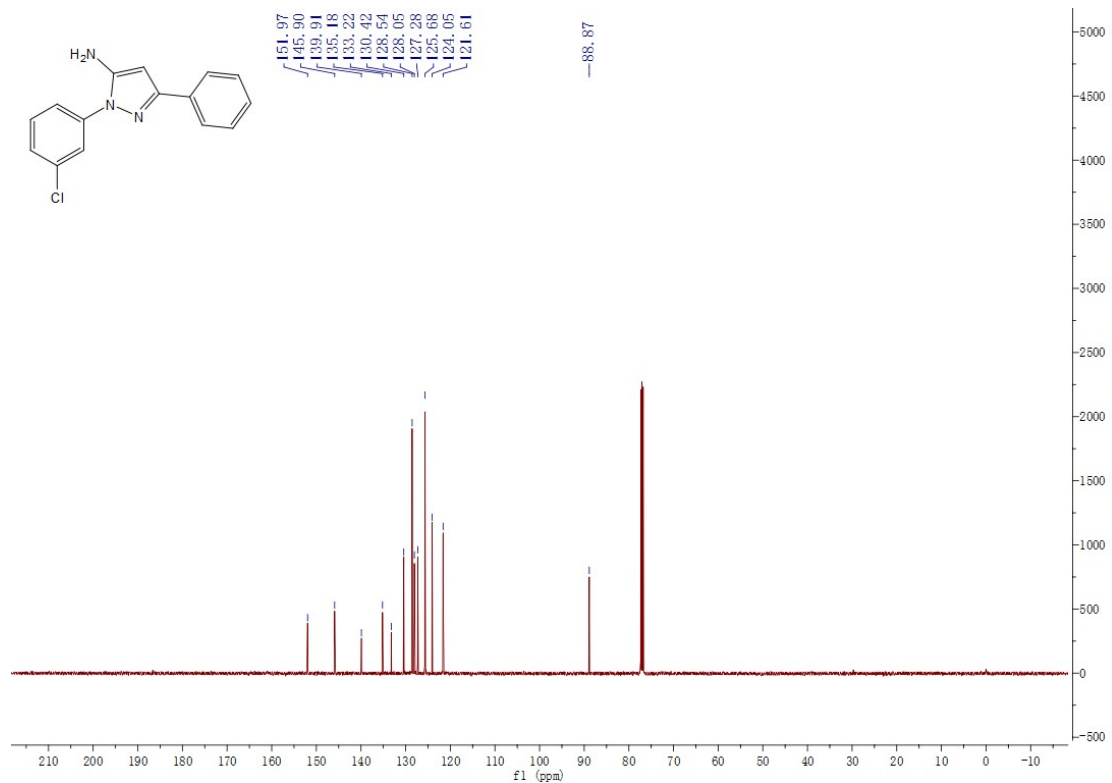

$^{13}\text{C}$  NMR (125 MHz,  $\text{CDCl}_3$ ) of compound **5m**

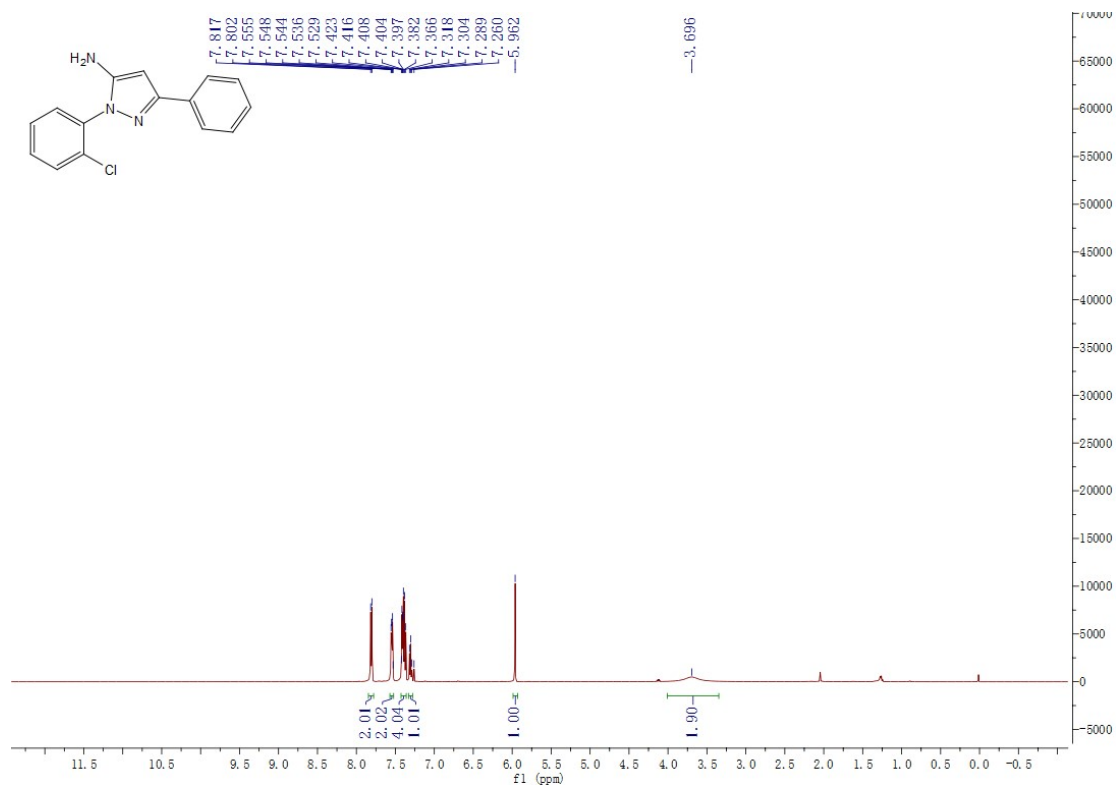

$^1\text{H}$  NMR (500 MHz,  $\text{CDCl}_3$ ) of compound **5n**

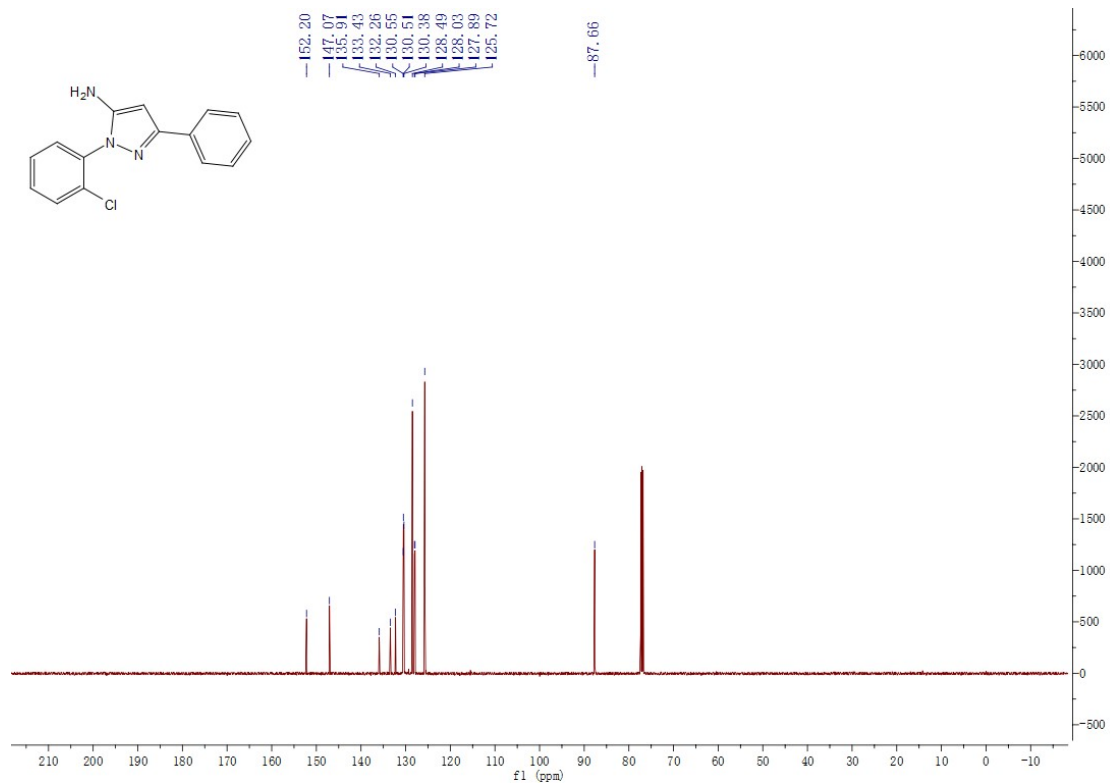

$^{13}\text{C}$  NMR (125 MHz,  $\text{CDCl}_3$ ) of compound **5n**

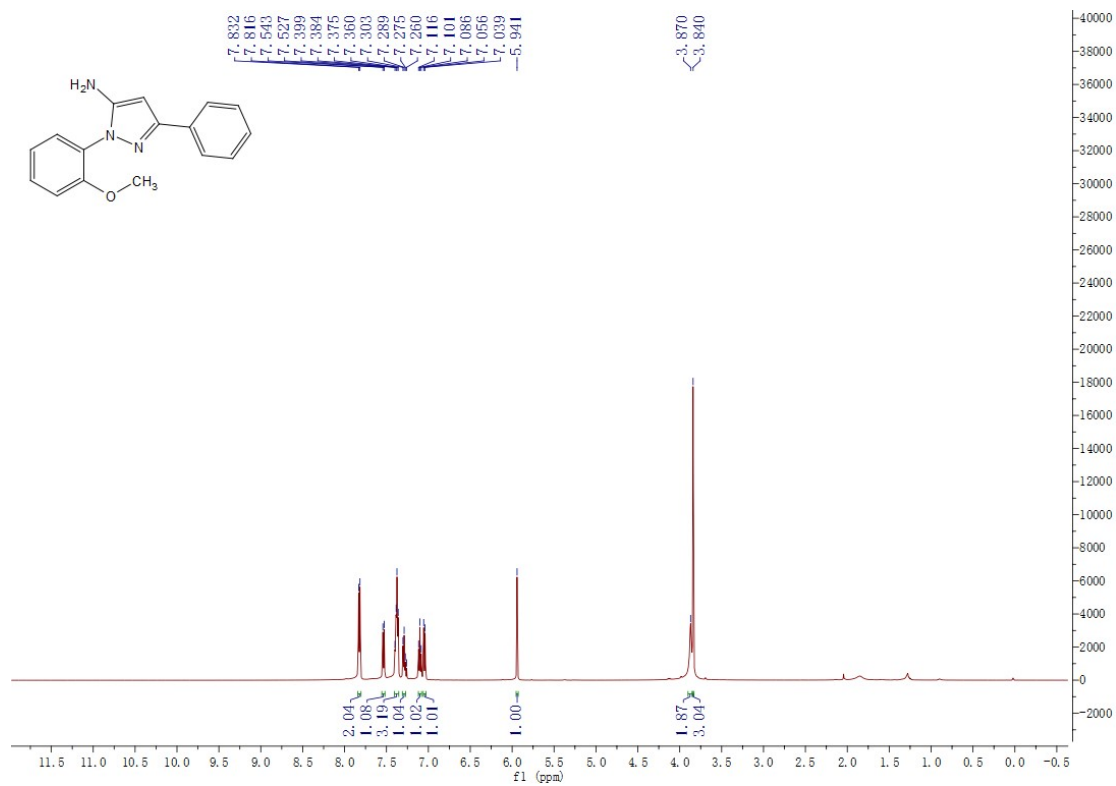

$^1\text{H}$  NMR (500 MHz,  $\text{CDCl}_3$ ) of compound **5o**

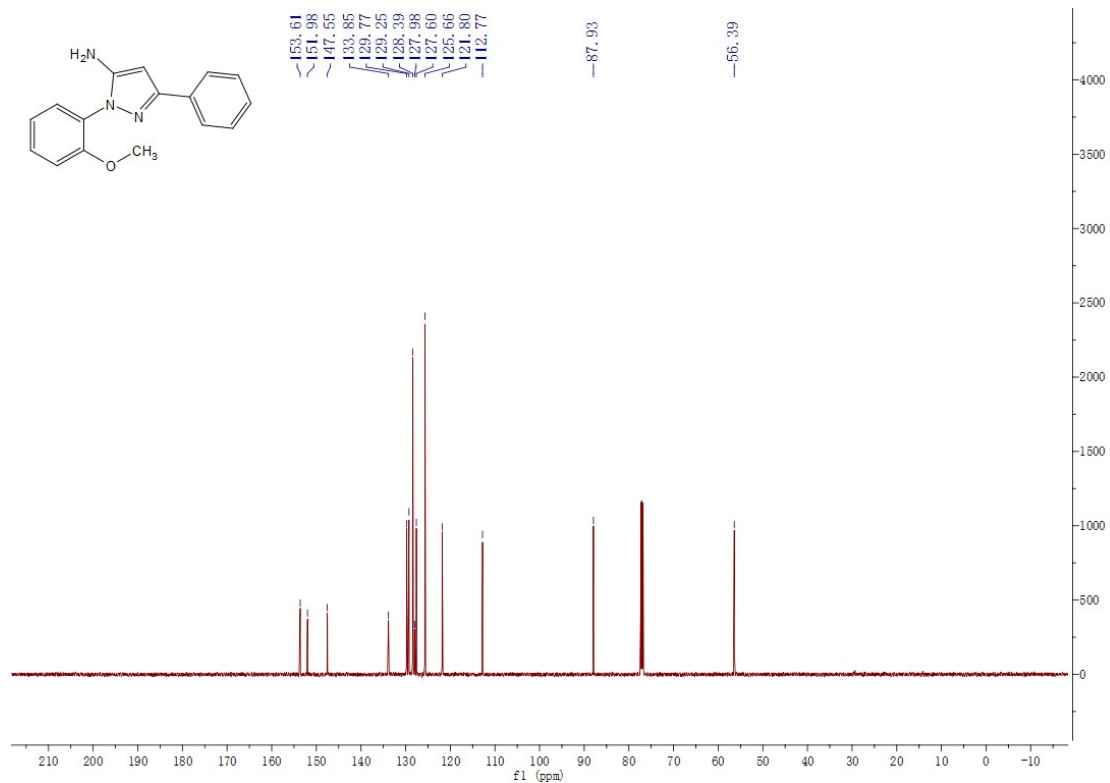

$^{13}\text{C}$  NMR (125 MHz,  $\text{CDCl}_3$ ) of compound **5o**

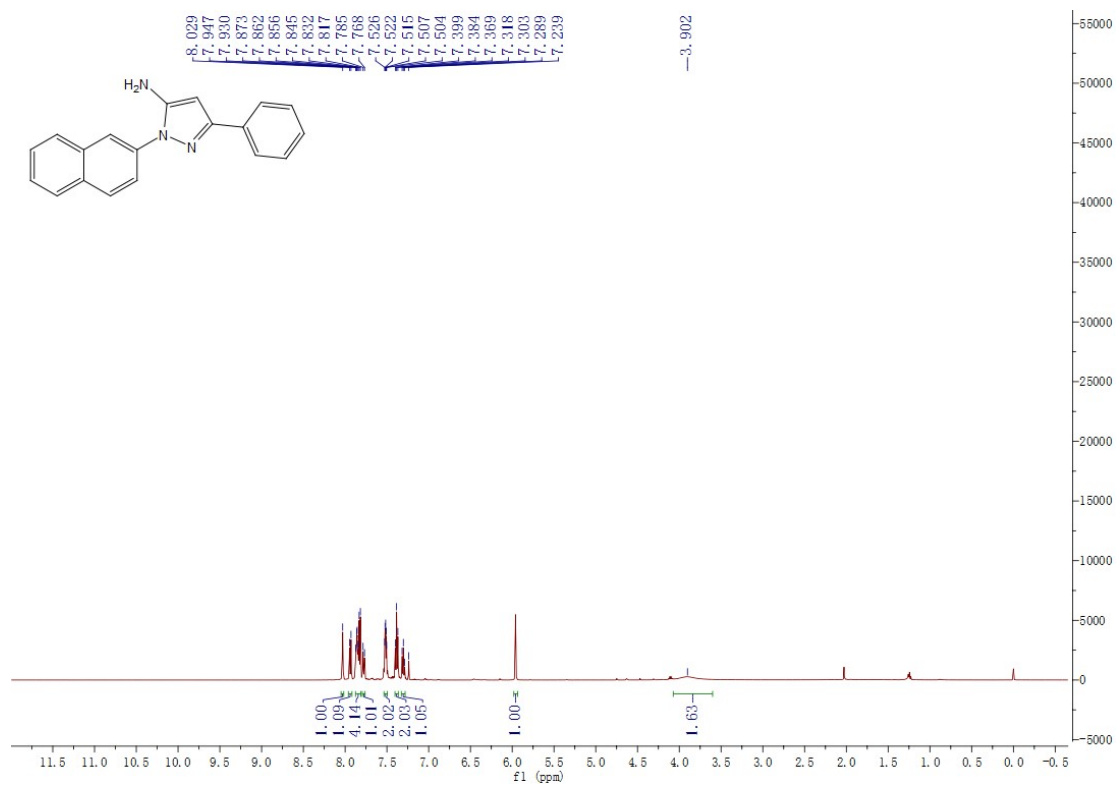

$^1\text{H}$  NMR (500 MHz,  $\text{CDCl}_3$ ) of compound **5p**

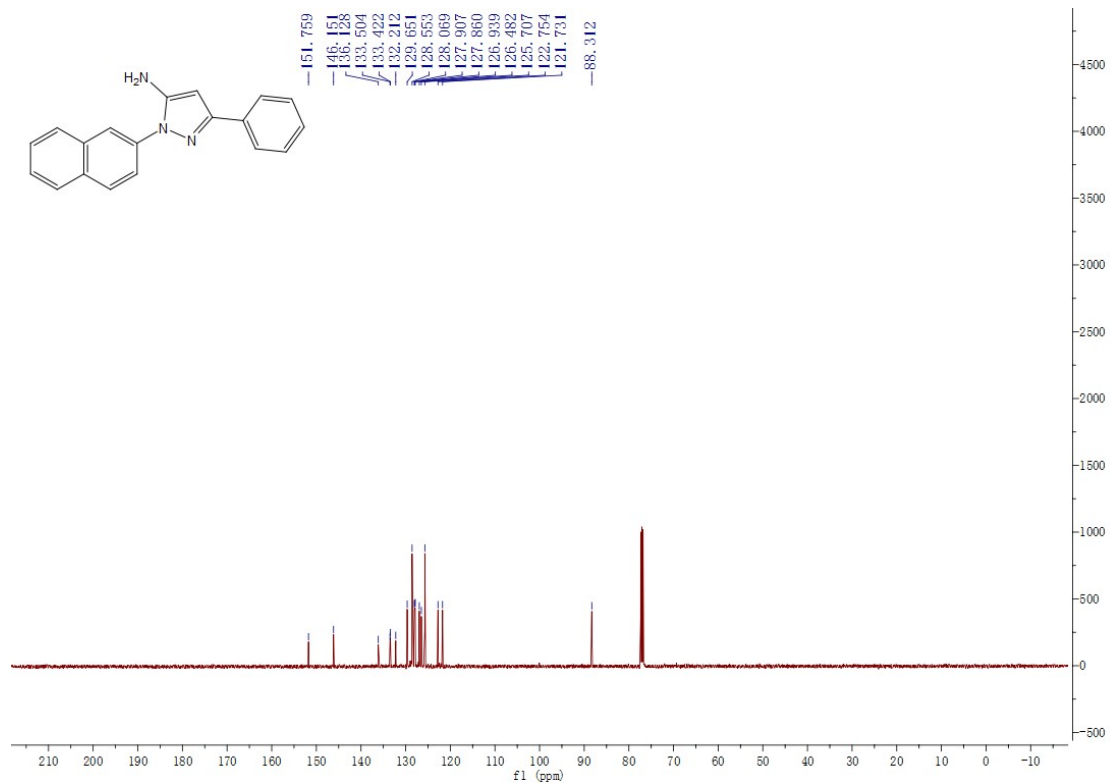

$^{13}\text{C}$  NMR (125 MHz,  $\text{CDCl}_3$ ) of compound **5p**

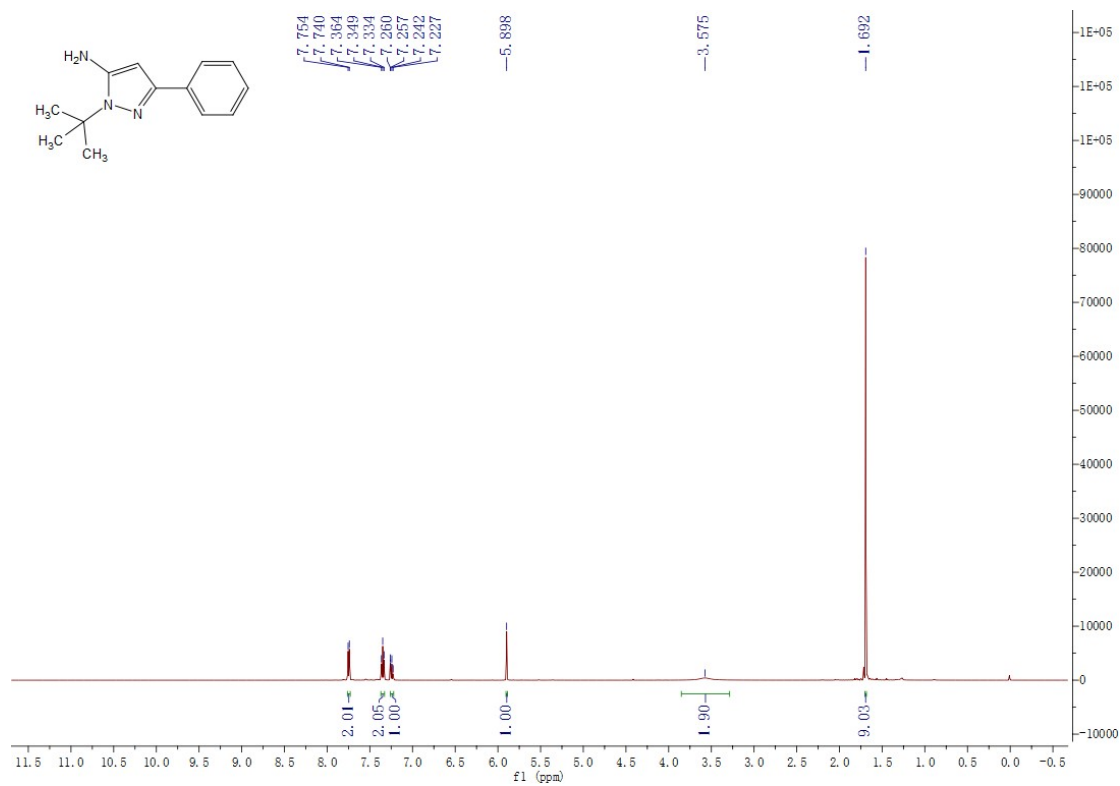

$^1\text{H}$  NMR (500 MHz,  $\text{CDCl}_3$ ) of compound **5q**

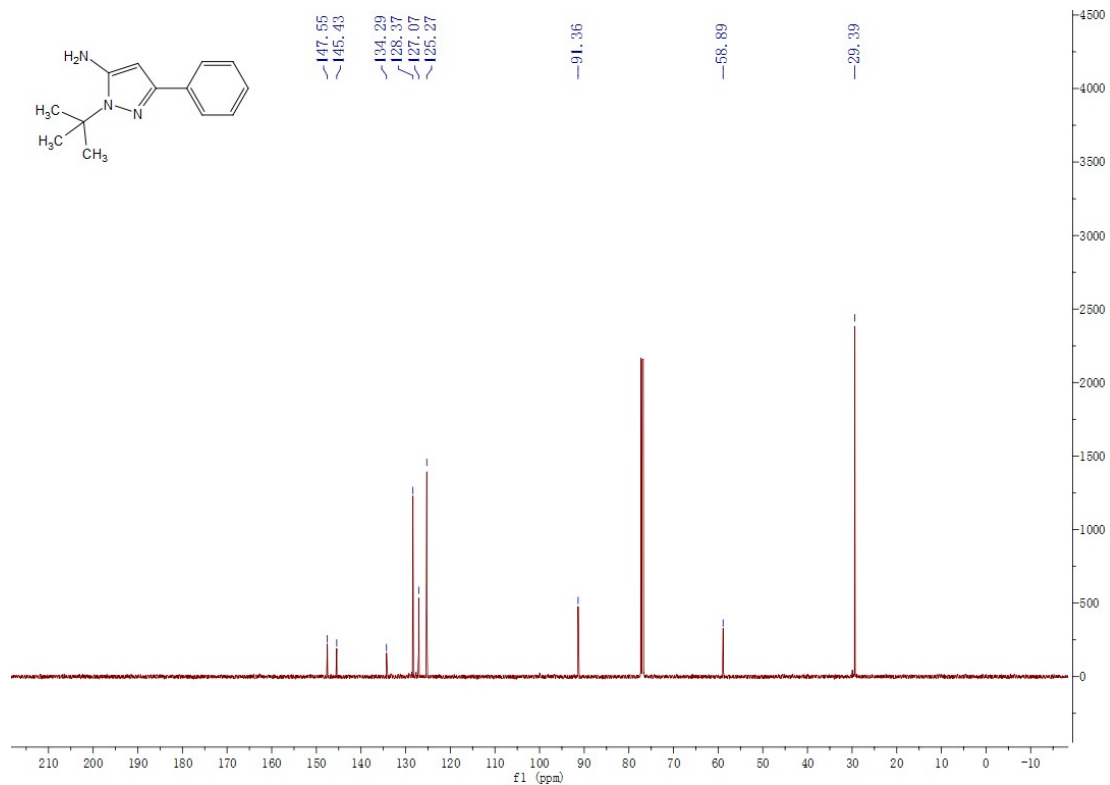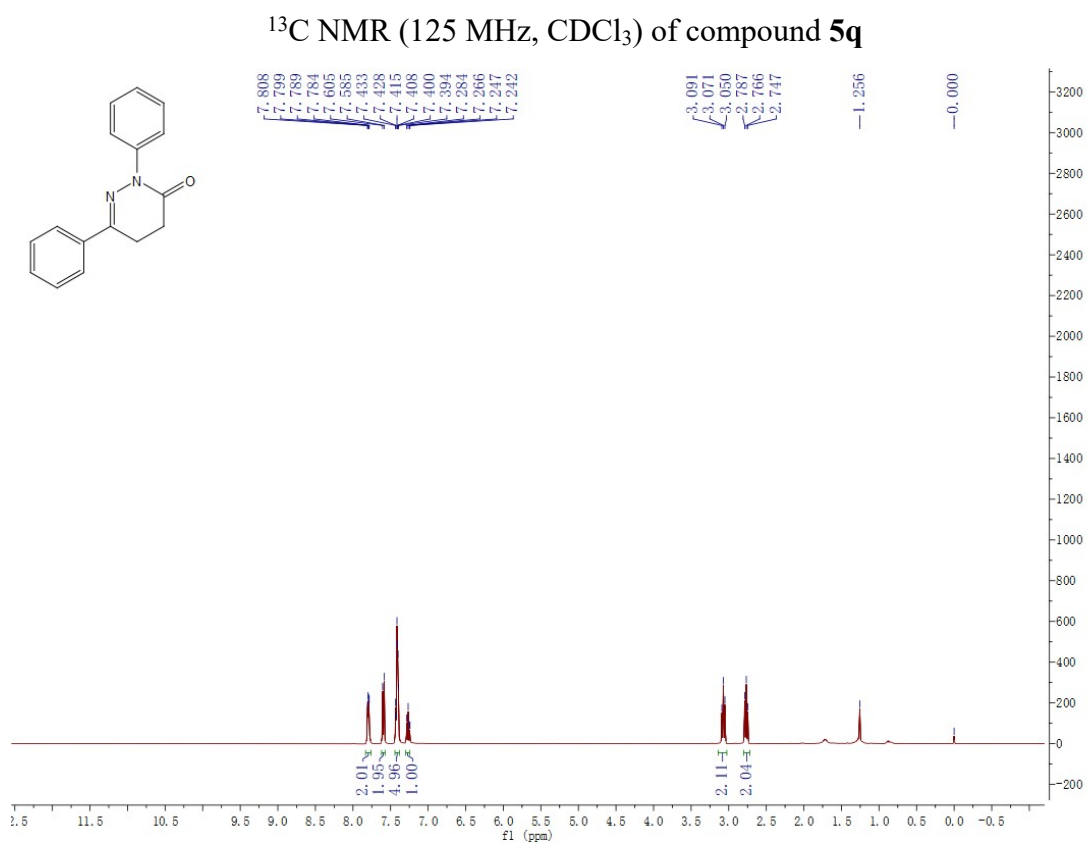



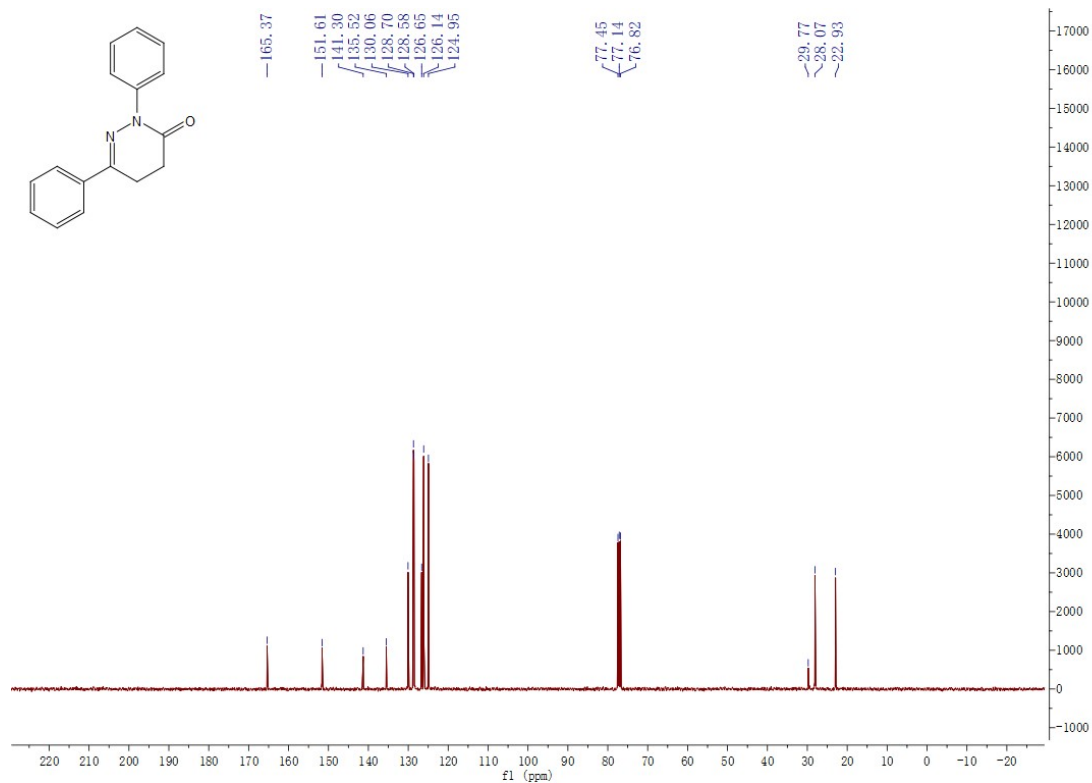

$^{13}\text{C}$  NMR (125 MHz,  $\text{CDCl}_3$ ) of compound **7a**

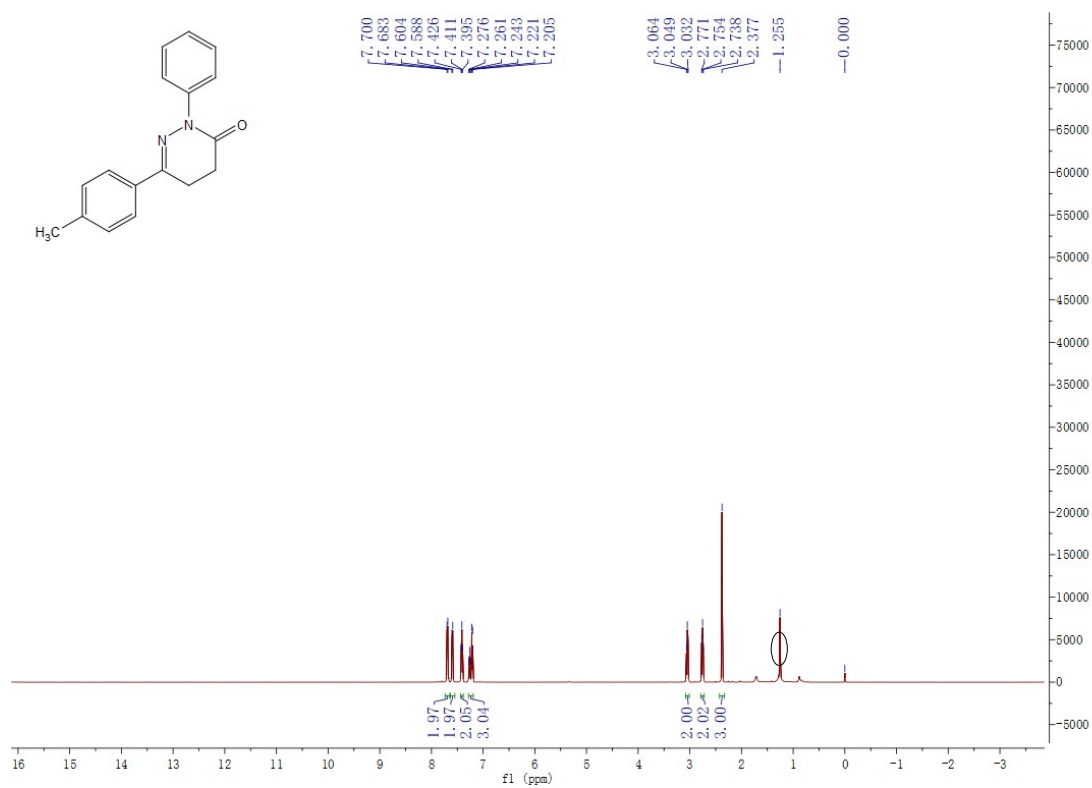

$^1\text{H}$  NMR (500 MHz,  $\text{CDCl}_3$ ) of compound **7b**

The peak in black oval is the signal of Apiezon grease.

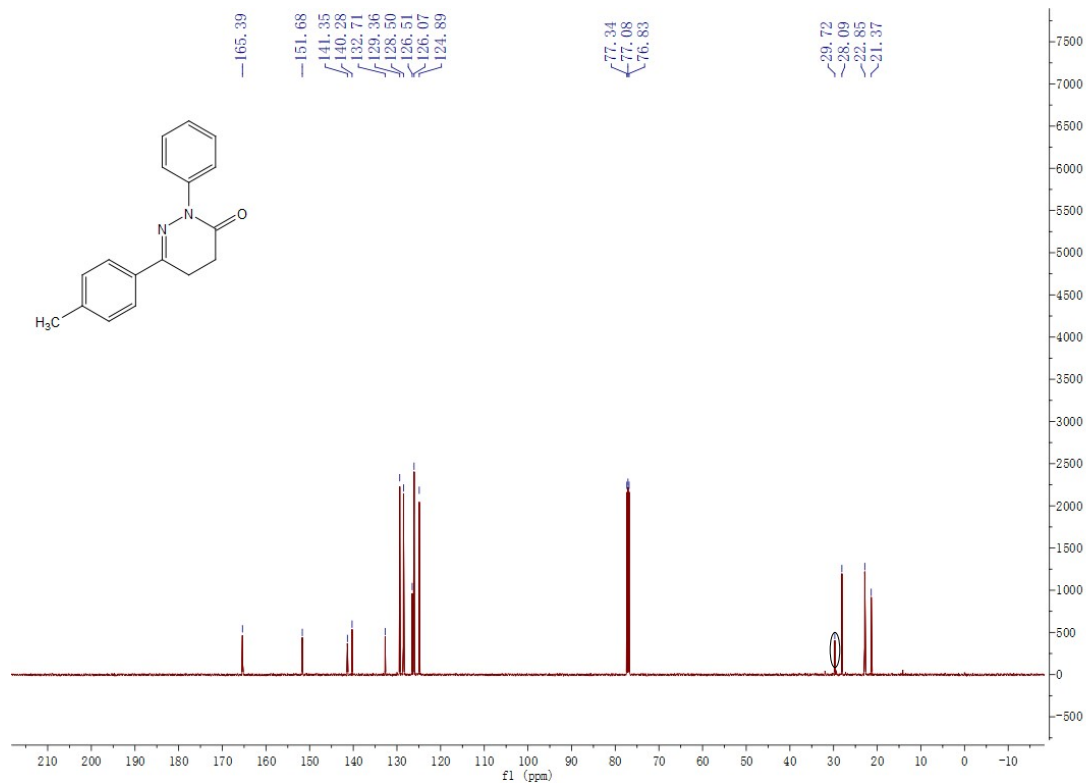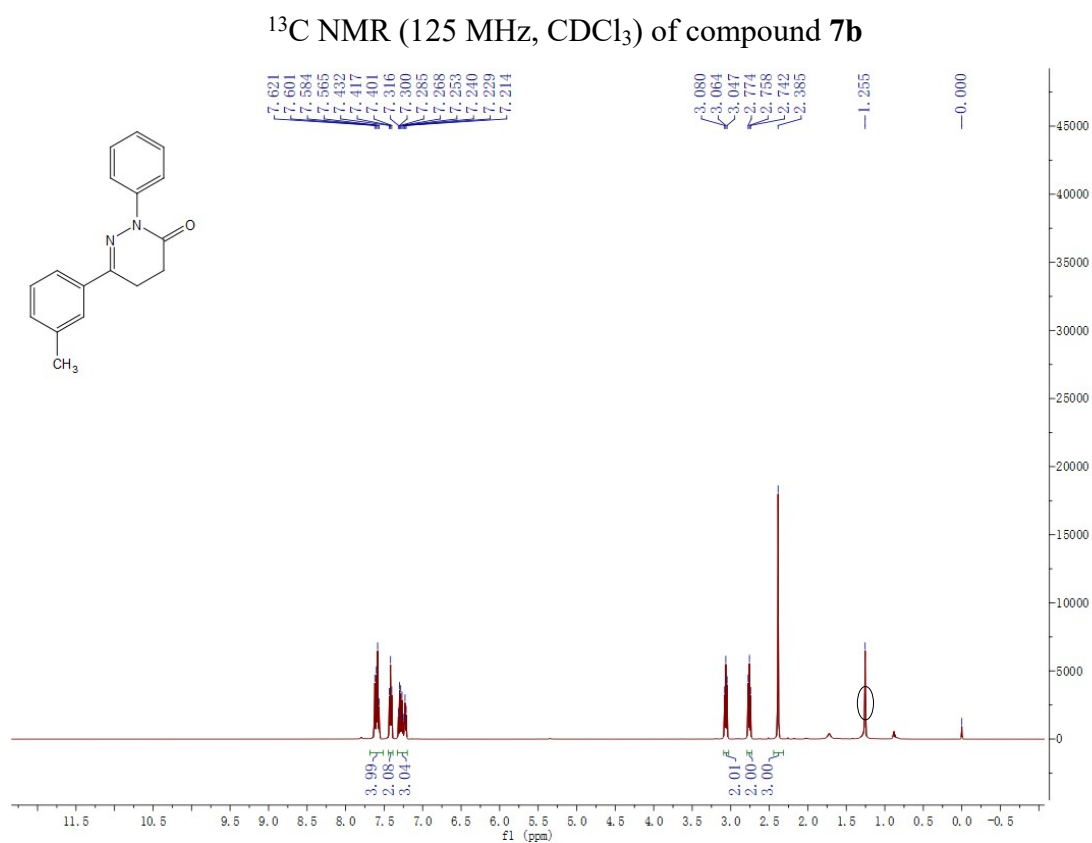

The peak in black oval is the signal of Apiezon grease.

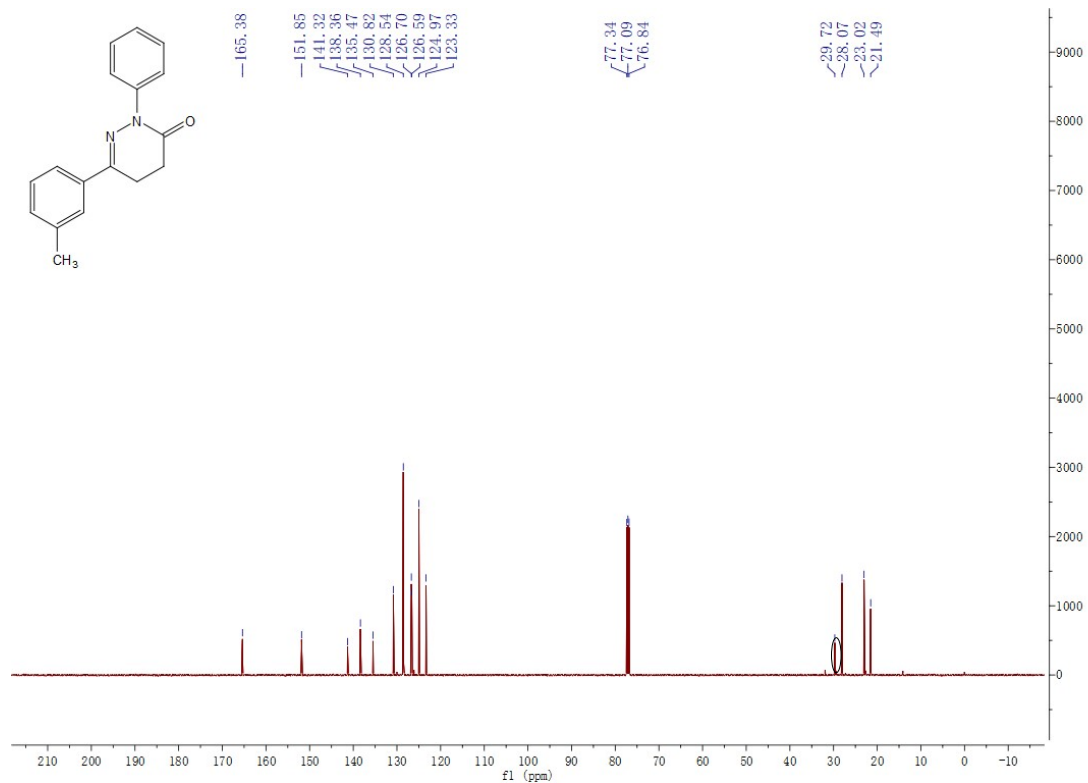

$^{13}\text{C}$  NMR (125 MHz,  $\text{CDCl}_3$ ) of compound **7c**

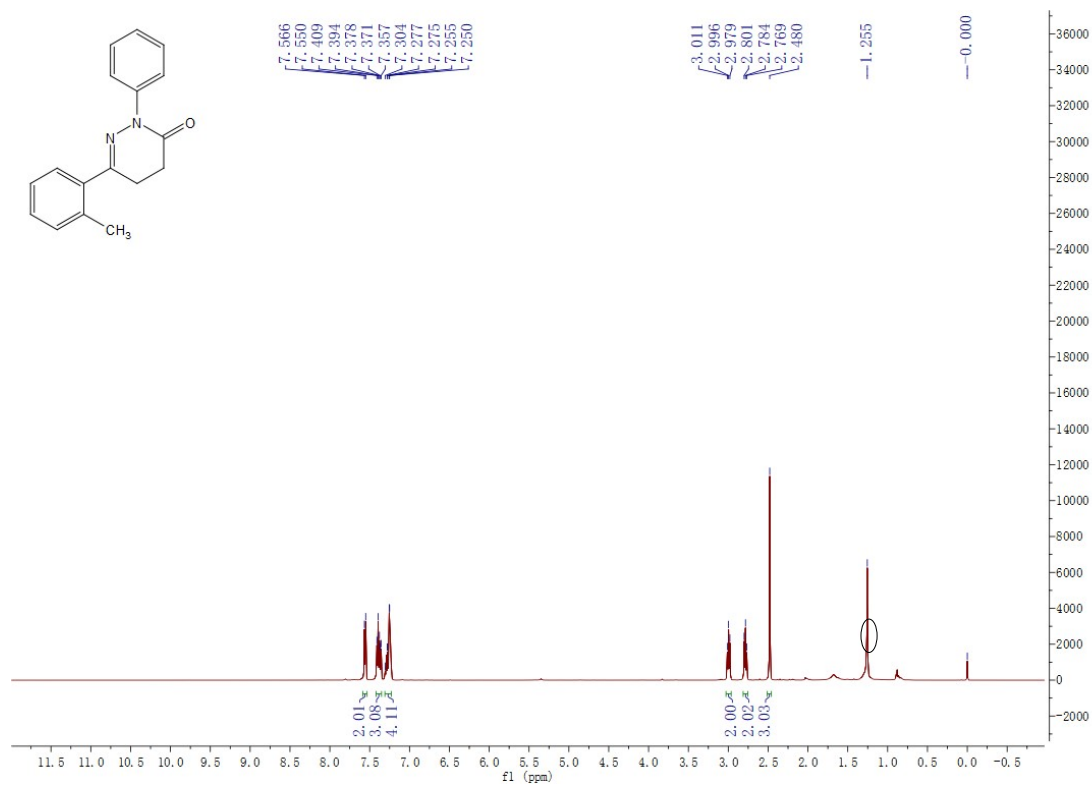

$^1\text{H}$  NMR (500 MHz,  $\text{CDCl}_3$ ) of compound **7d**

The peak in black oval is the signal of Apiezon grease.

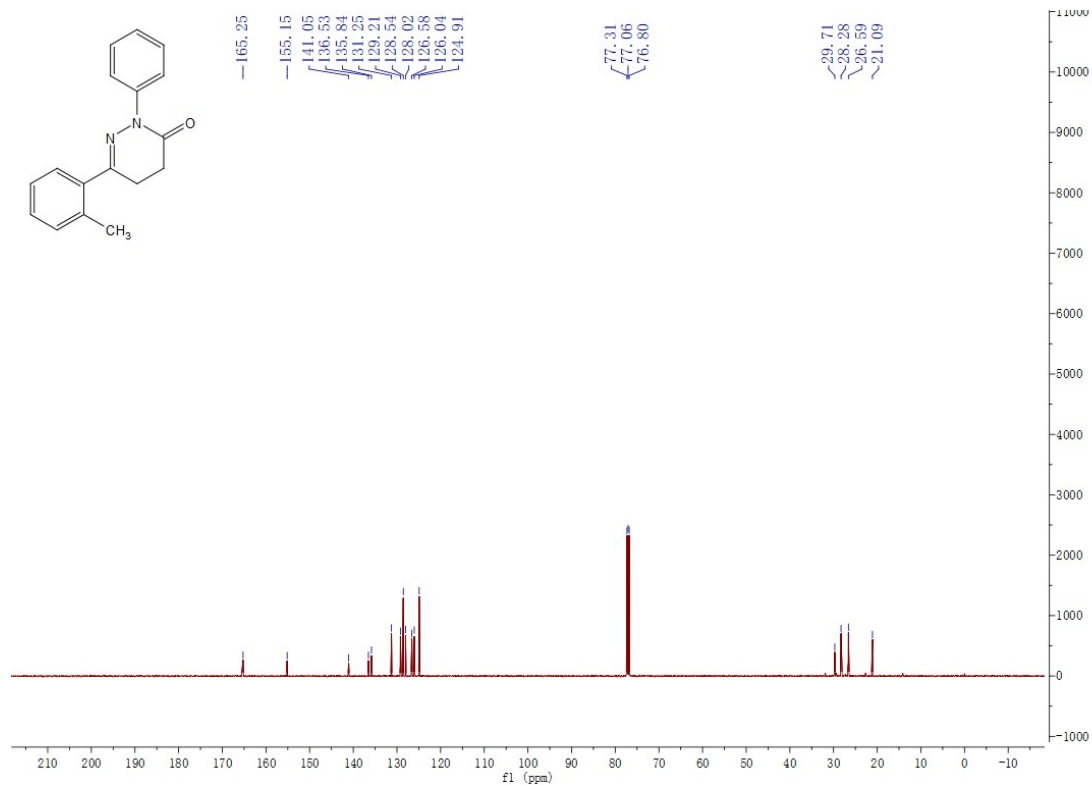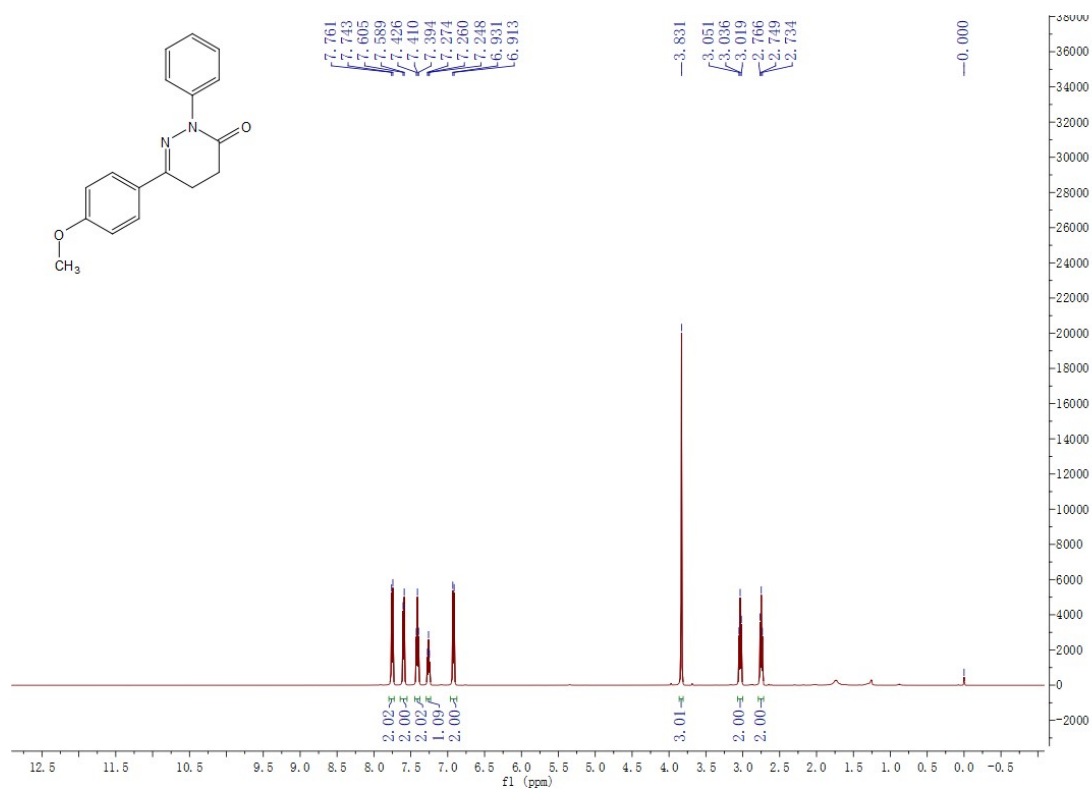

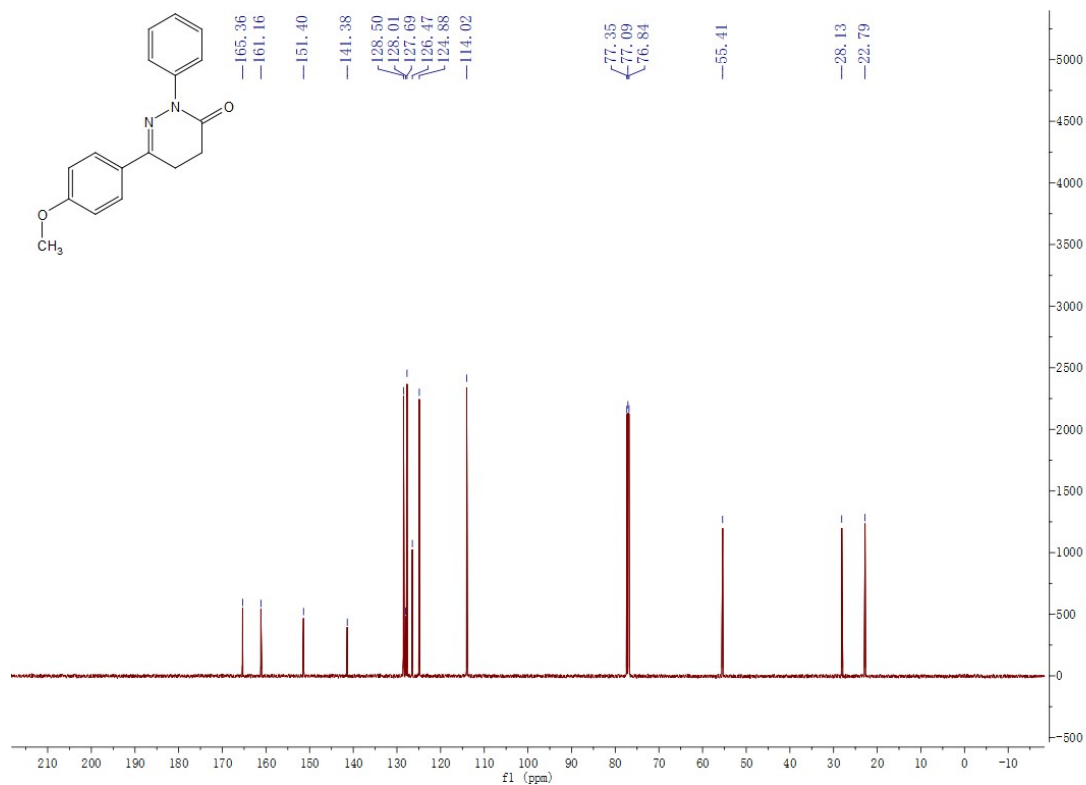

$^{13}\text{C}$  NMR (125 MHz,  $\text{CDCl}_3$ ) of compound **7e**

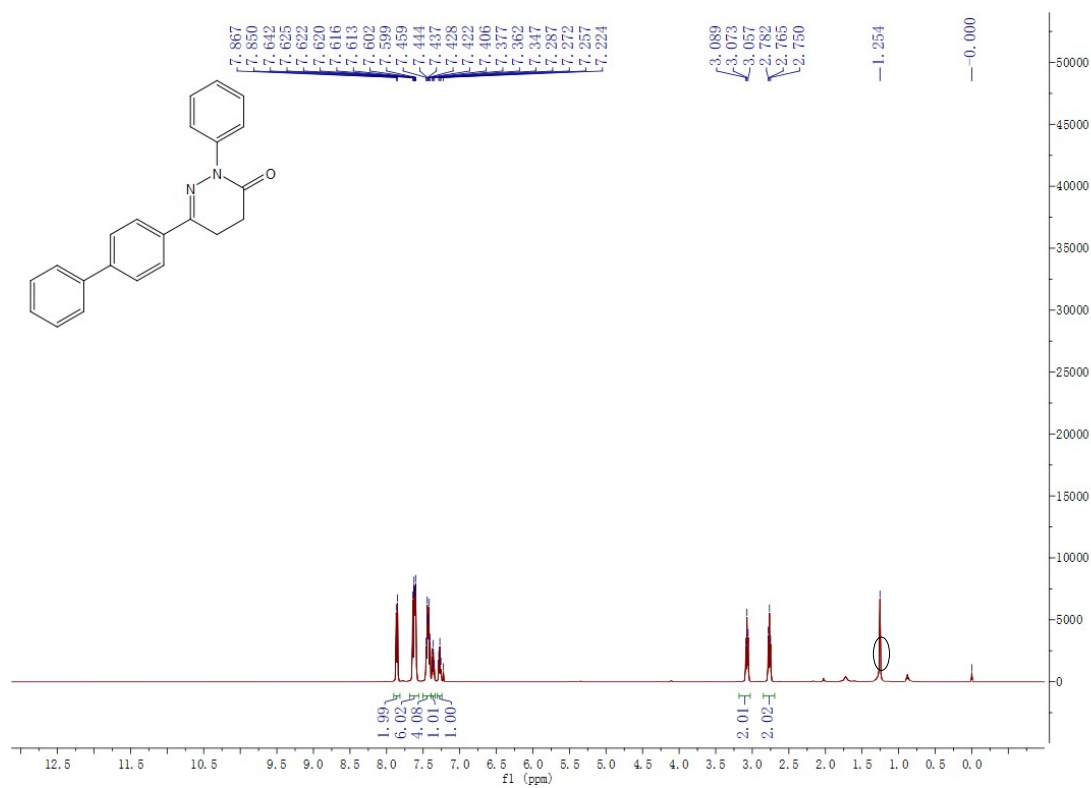

$^1\text{H}$  NMR (500 MHz,  $\text{CDCl}_3$ ) of compound **7f**

The peak in black oval is the signal of Apiezon grease.

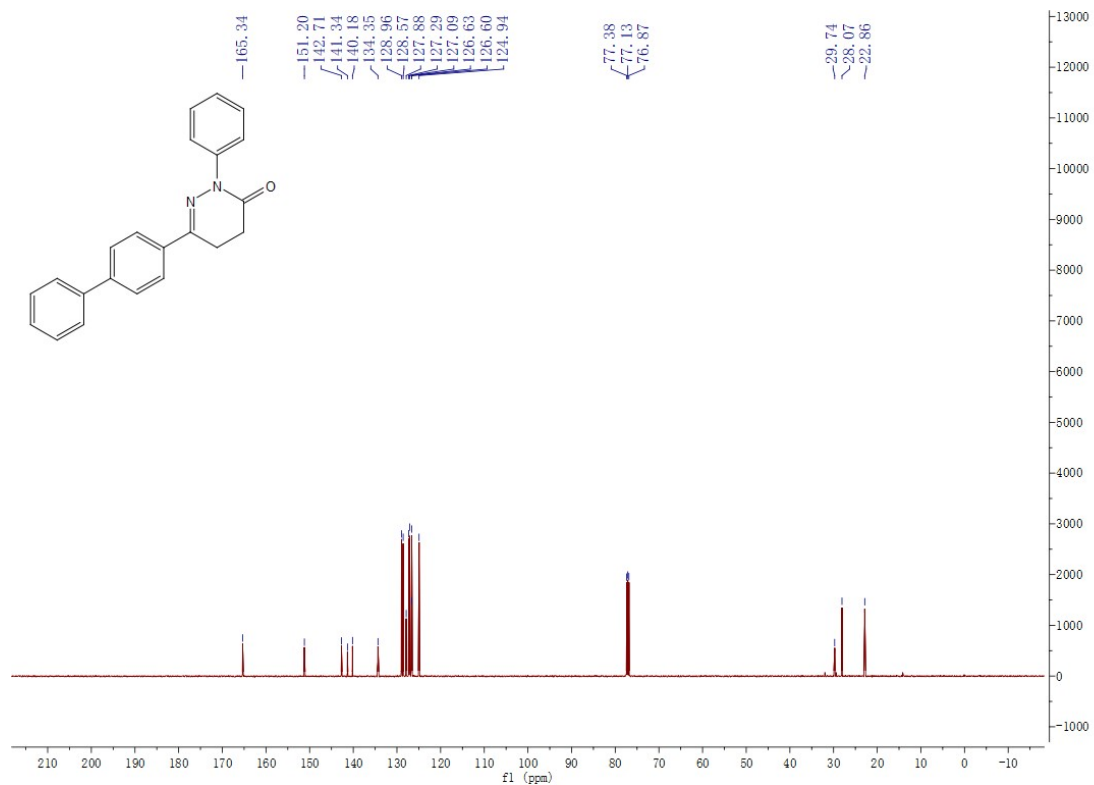

$^{13}\text{C}$  NMR (125 MHz,  $\text{CDCl}_3$ ) of compound **7f**

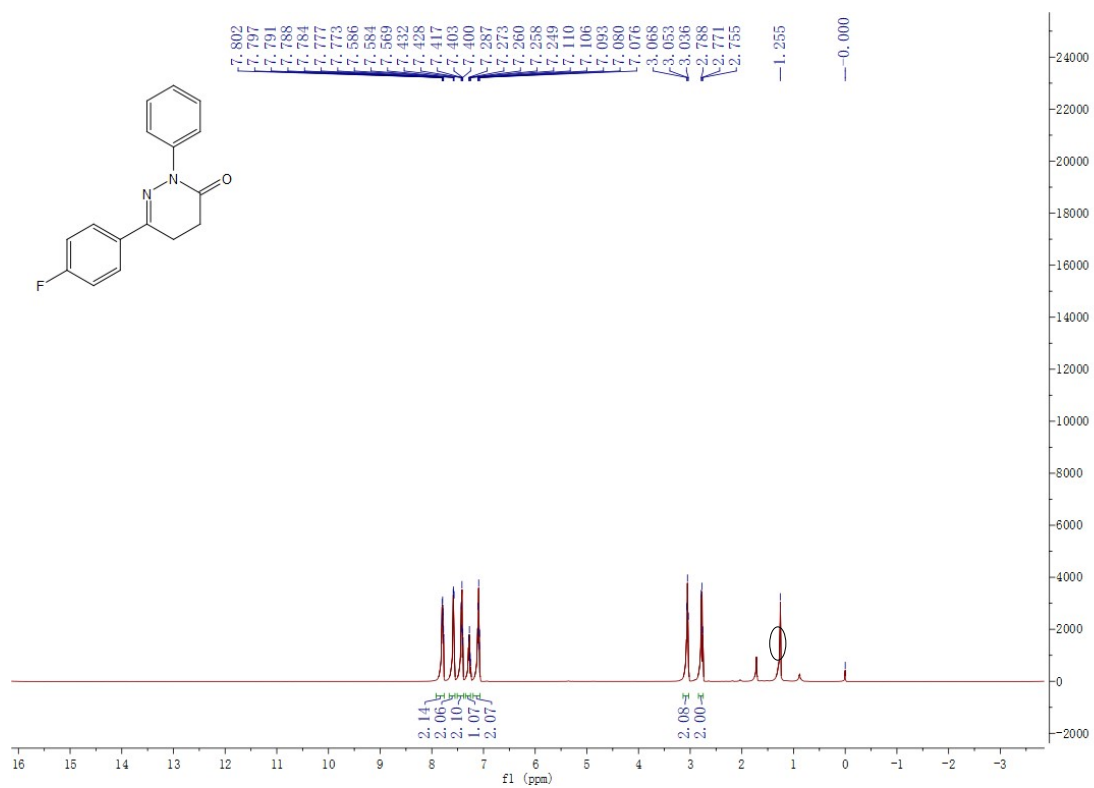

$^1\text{H}$  NMR (500 MHz,  $\text{CDCl}_3$ ) of compound **7g**

The peak in black oval is the signal of Apiezon grease.

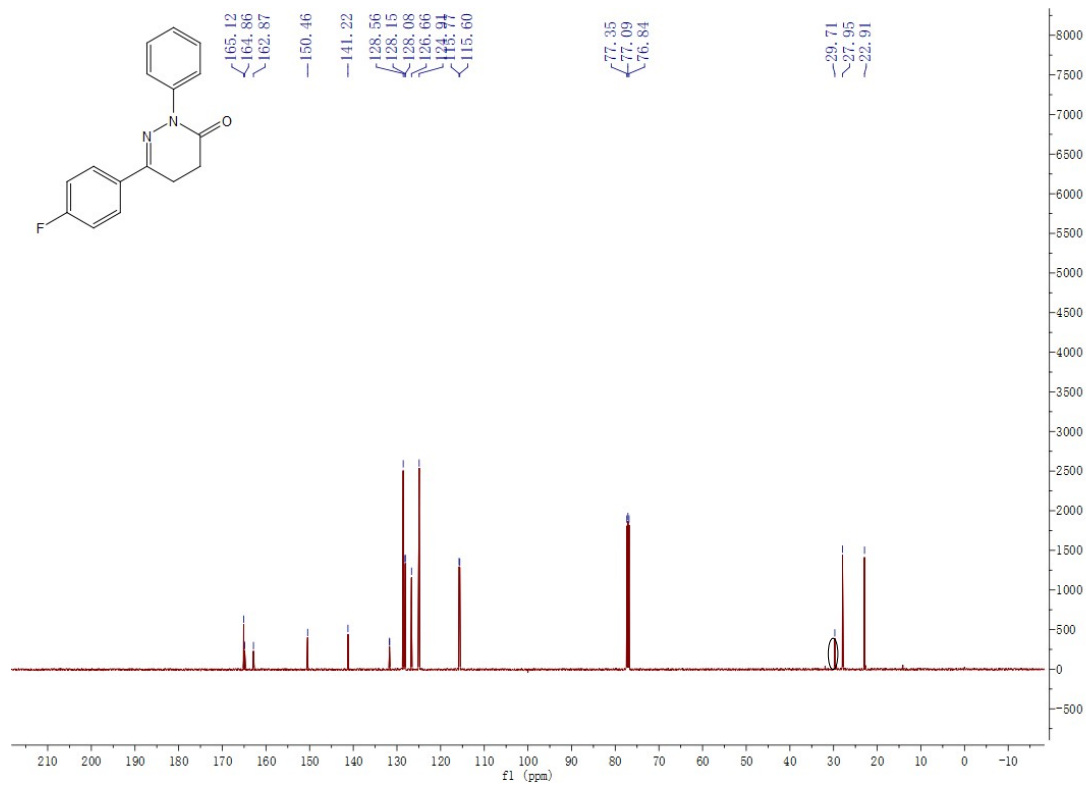

$^{13}\text{C}$  NMR (125 MHz,  $\text{CDCl}_3$ ) of compound **7g**

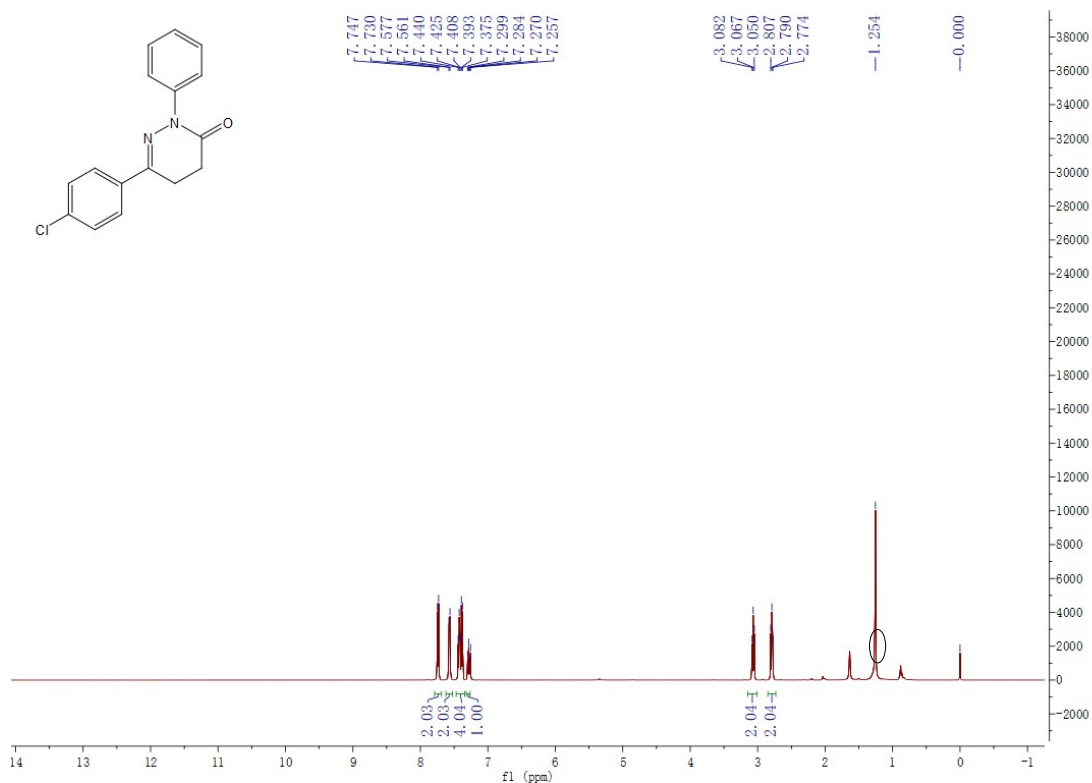

$^1\text{H}$  NMR (500 MHz,  $\text{CDCl}_3$ ) of compound **7h**

The peak in black oval is the signal of Apiezon grease.

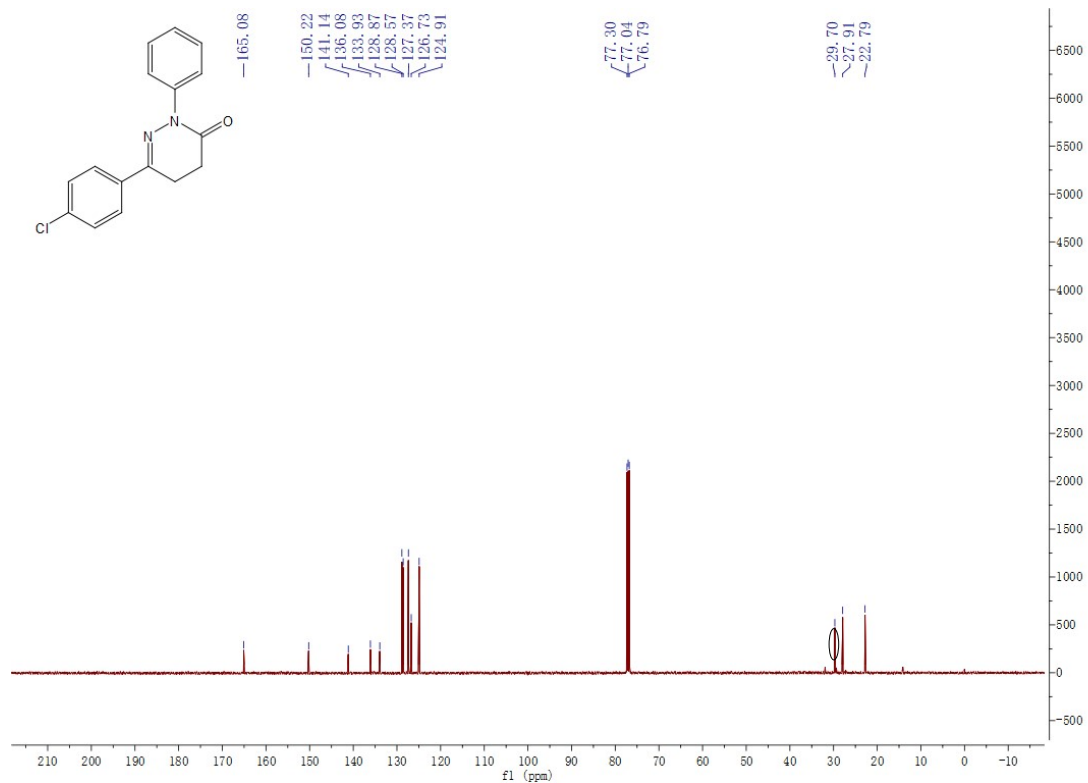

$^{13}\text{C}$  NMR (125 MHz,  $\text{CDCl}_3$ ) of compound **7h**

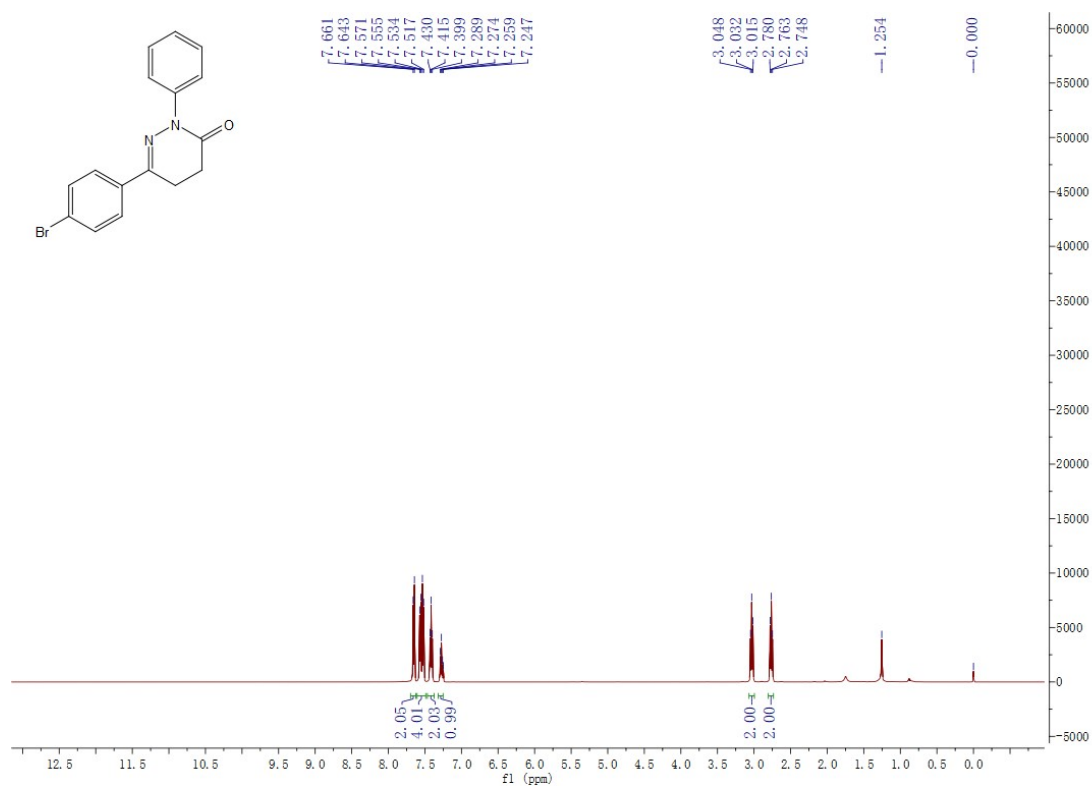

$^1\text{H}$  NMR (500 MHz,  $\text{CDCl}_3$ ) of compound **7i**



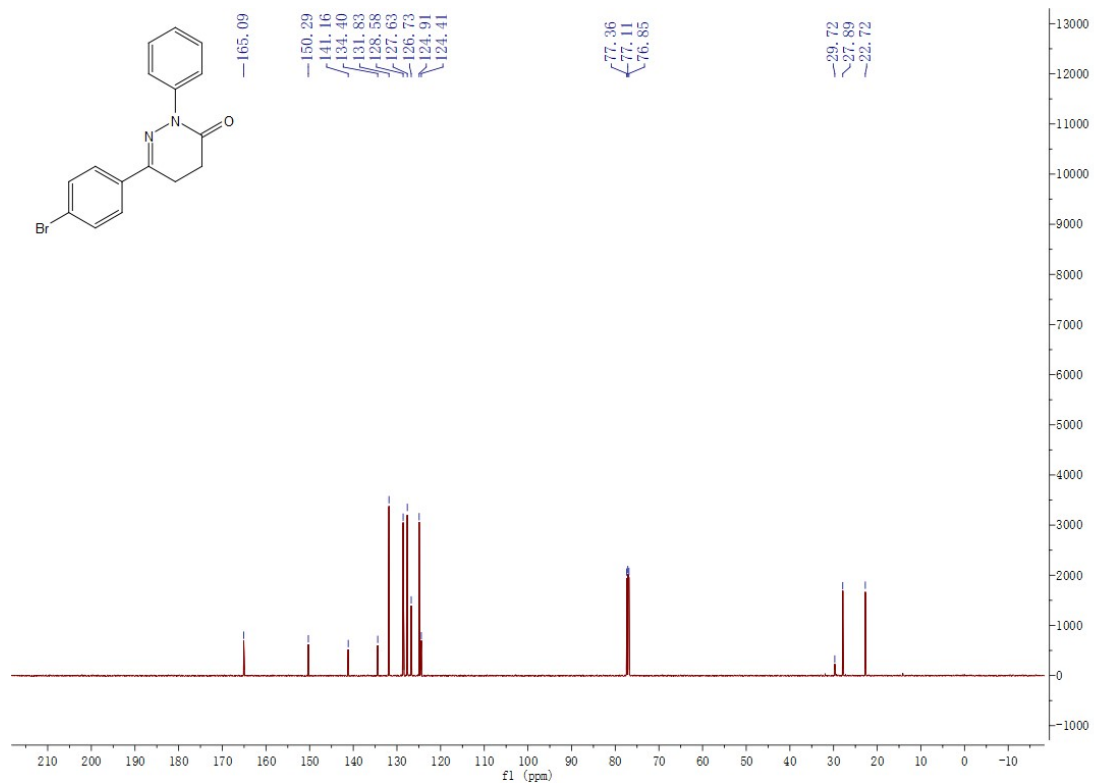

$^{13}\text{C}$  NMR (125 MHz,  $\text{CDCl}_3$ ) of compound **7i**

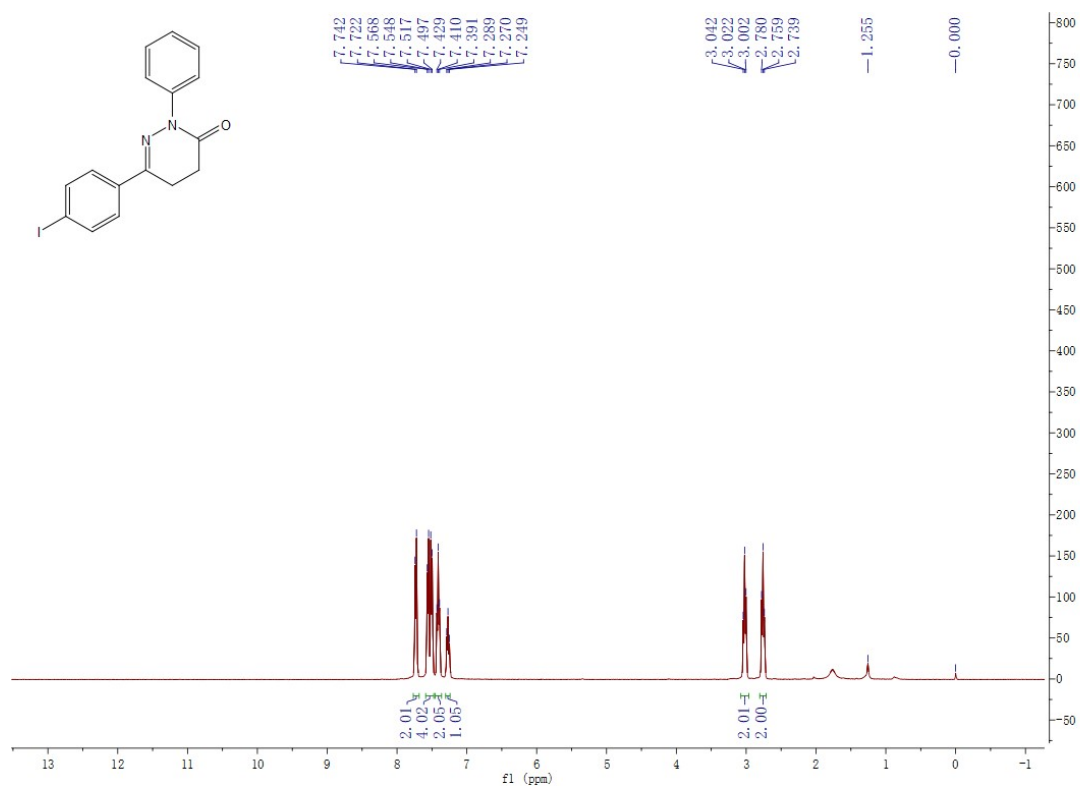

$^1\text{H}$  NMR (400 MHz,  $\text{CDCl}_3$ ) of compound **7j**

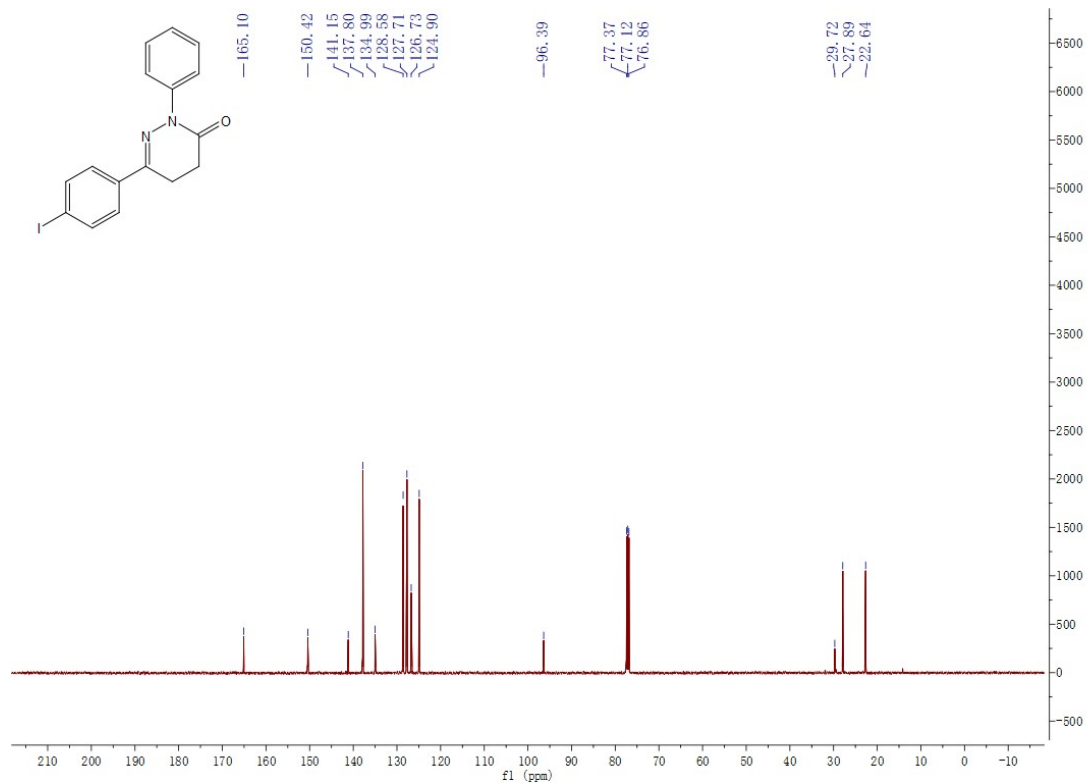

$^{13}\text{C}$  NMR (101 MHz,  $\text{CDCl}_3$ ) of compound **7j**

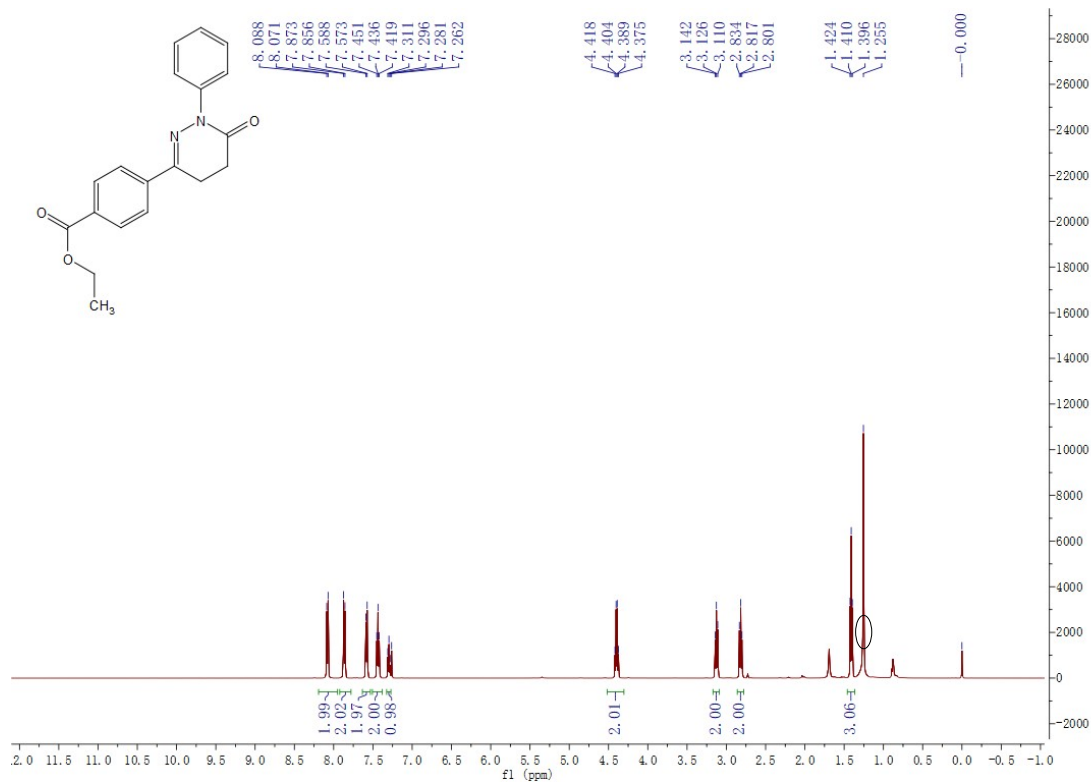

$^1\text{H}$  NMR (500 MHz,  $\text{CDCl}_3$ ) of compound **7k**

The peak in black oval is the signal of Apiezon grease.

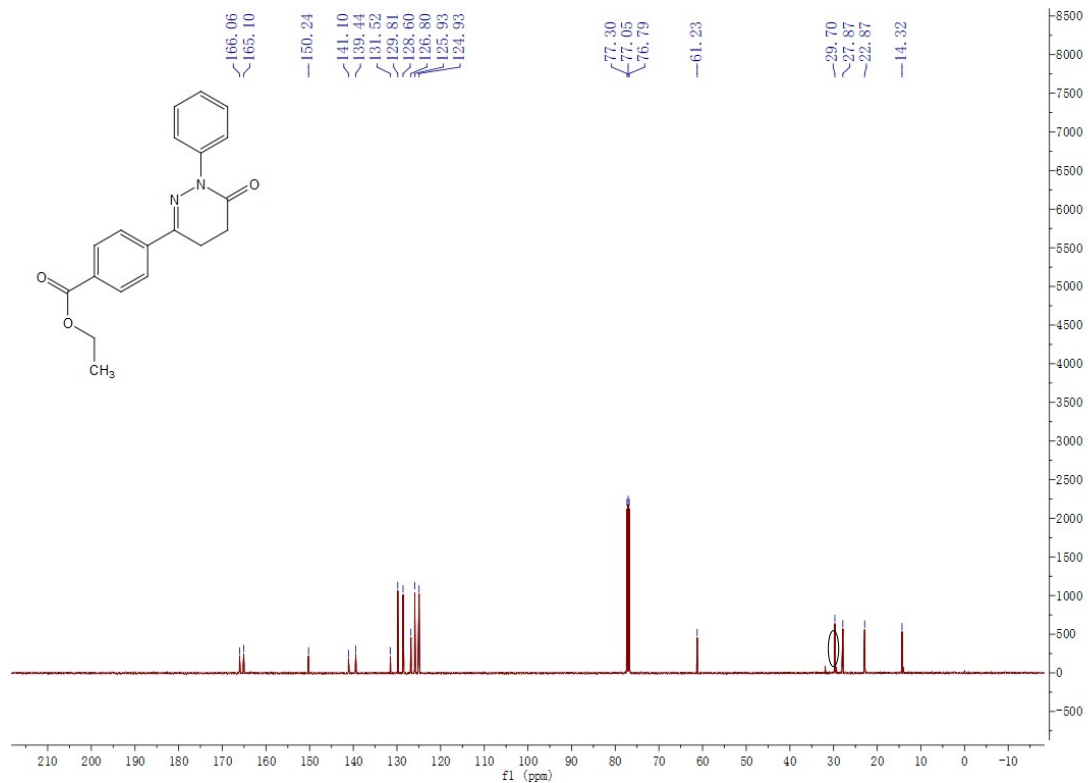

<sup>13</sup>C NMR (125 MHz, CDCl<sub>3</sub>) of compound **7k**

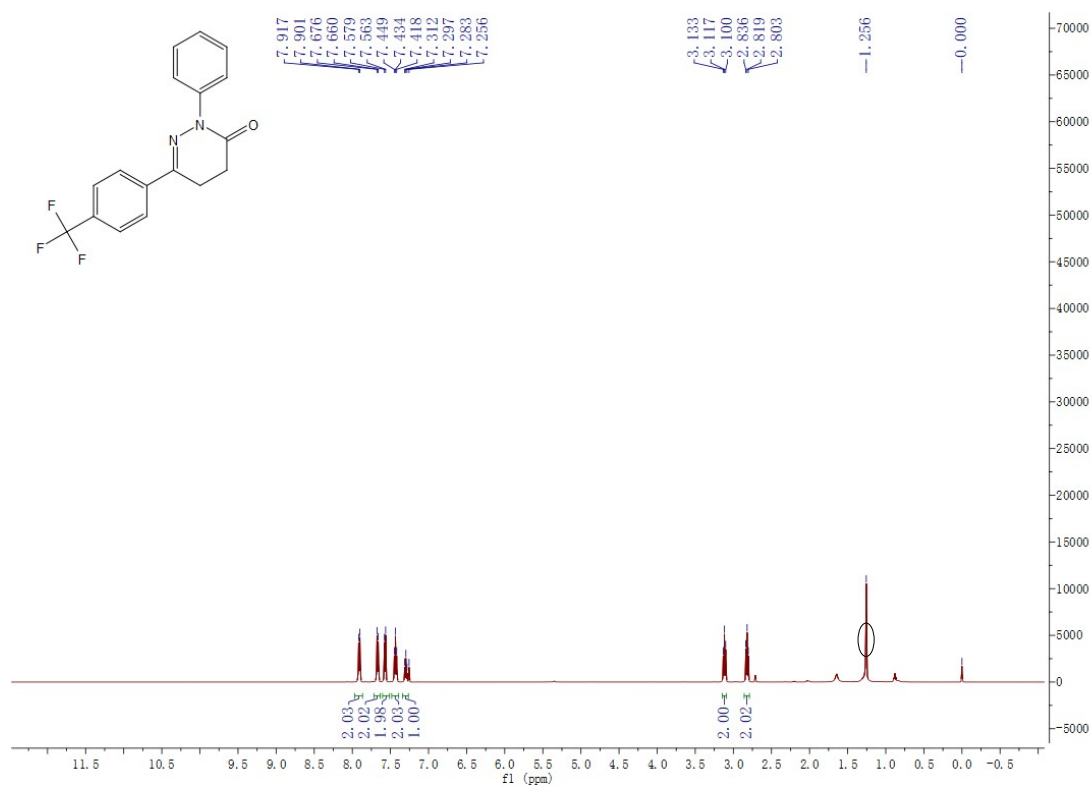

<sup>1</sup>H NMR (500 MHz, CDCl<sub>3</sub>) of compound **7l**

The peak in black oval is the signal of Apiezon grease.

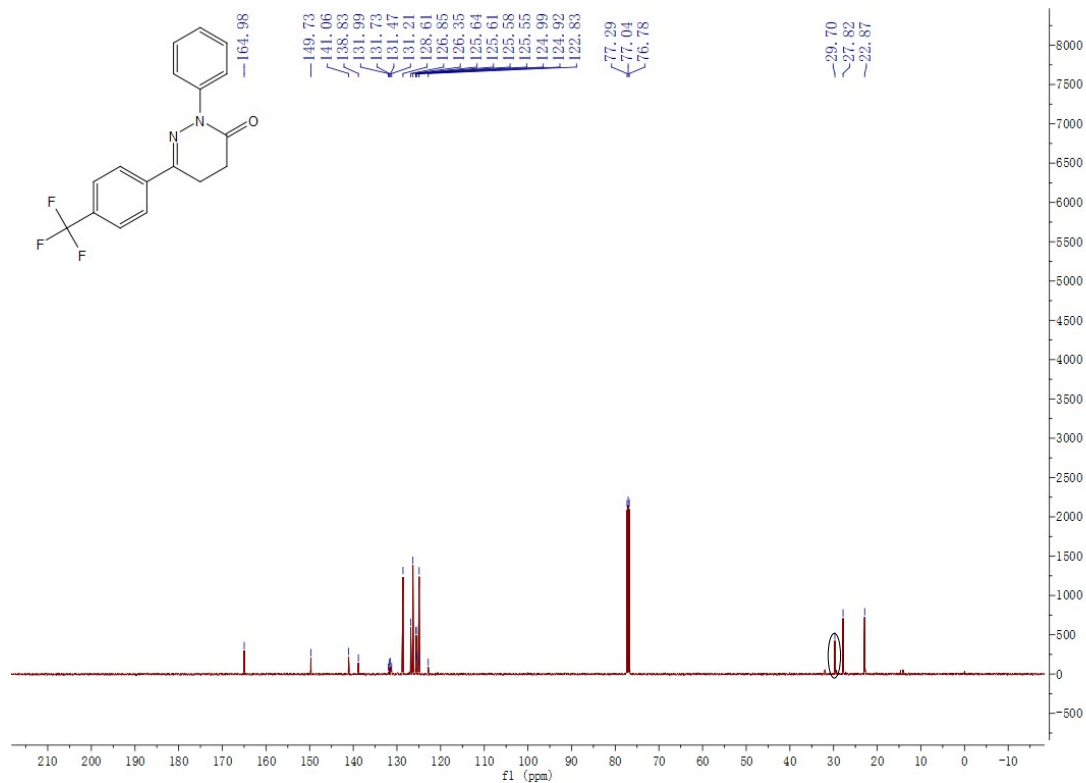

**<sup>13</sup>C NMR (125 MHz, CDCl<sub>3</sub>) of compound 7i**

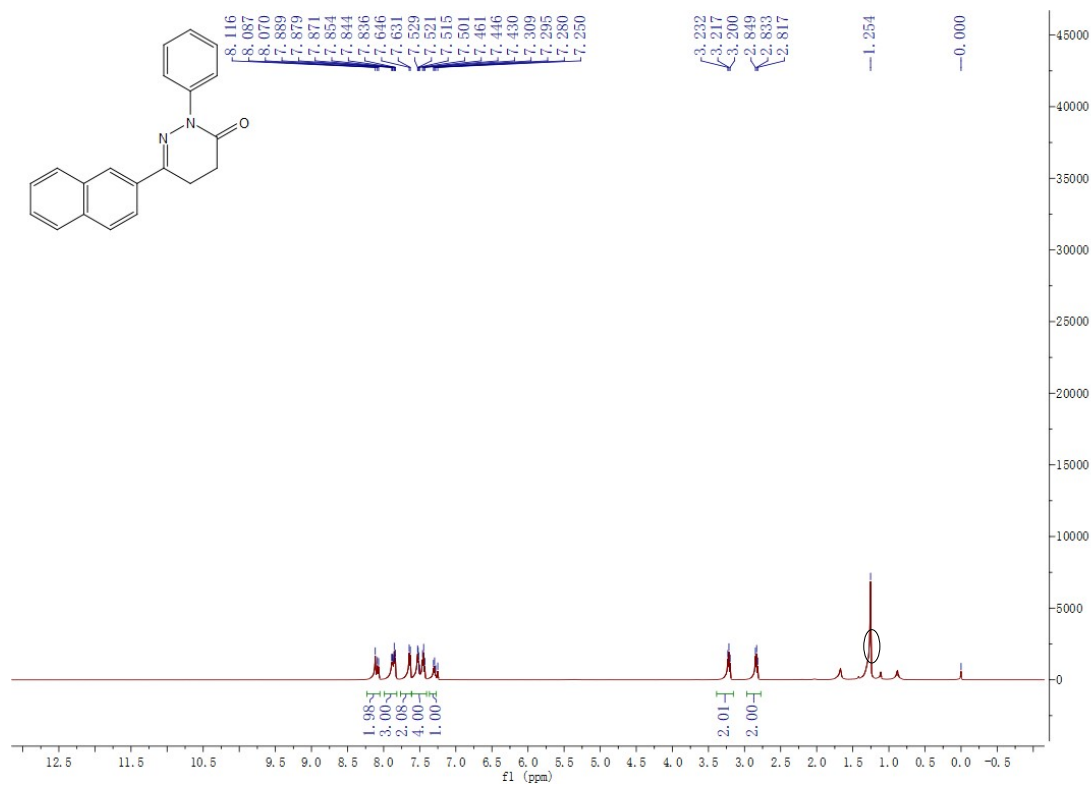

**<sup>1</sup>H NMR (500 MHz, CDCl<sub>3</sub>) of compound 7m**

The peak in black oval is the signal of Apiezon grease.

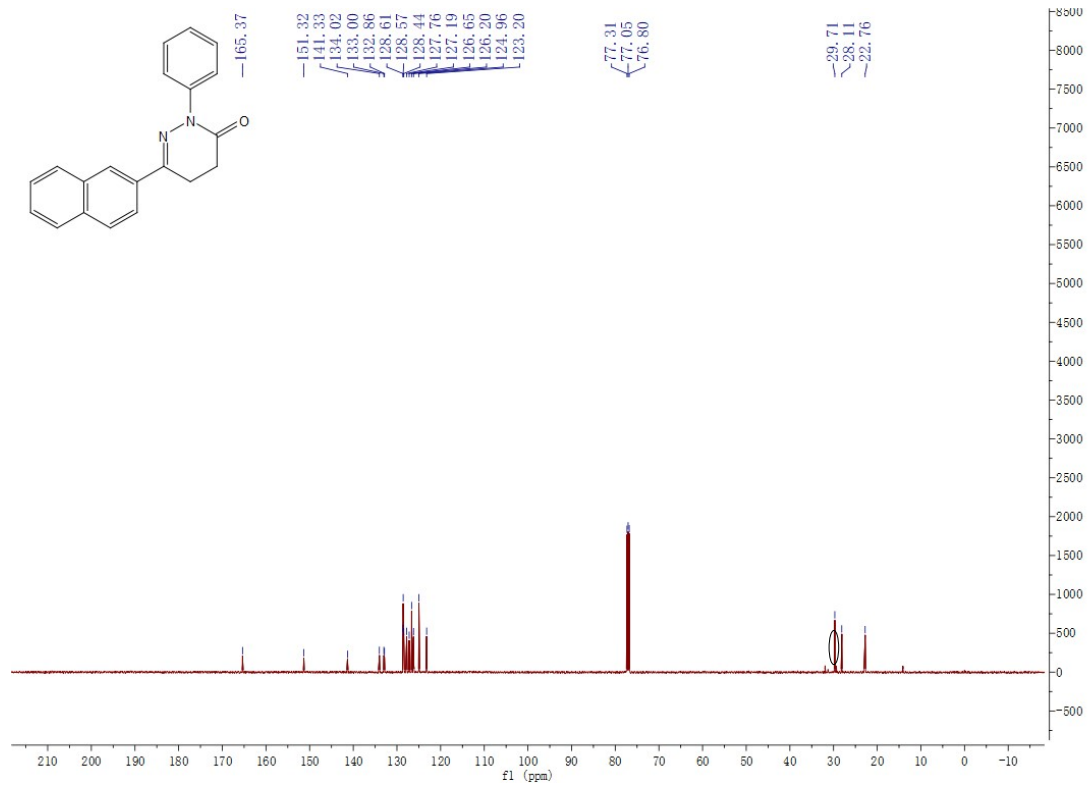

$^{13}\text{C}$  NMR (125 MHz,  $\text{CDCl}_3$ ) of compound **7m**

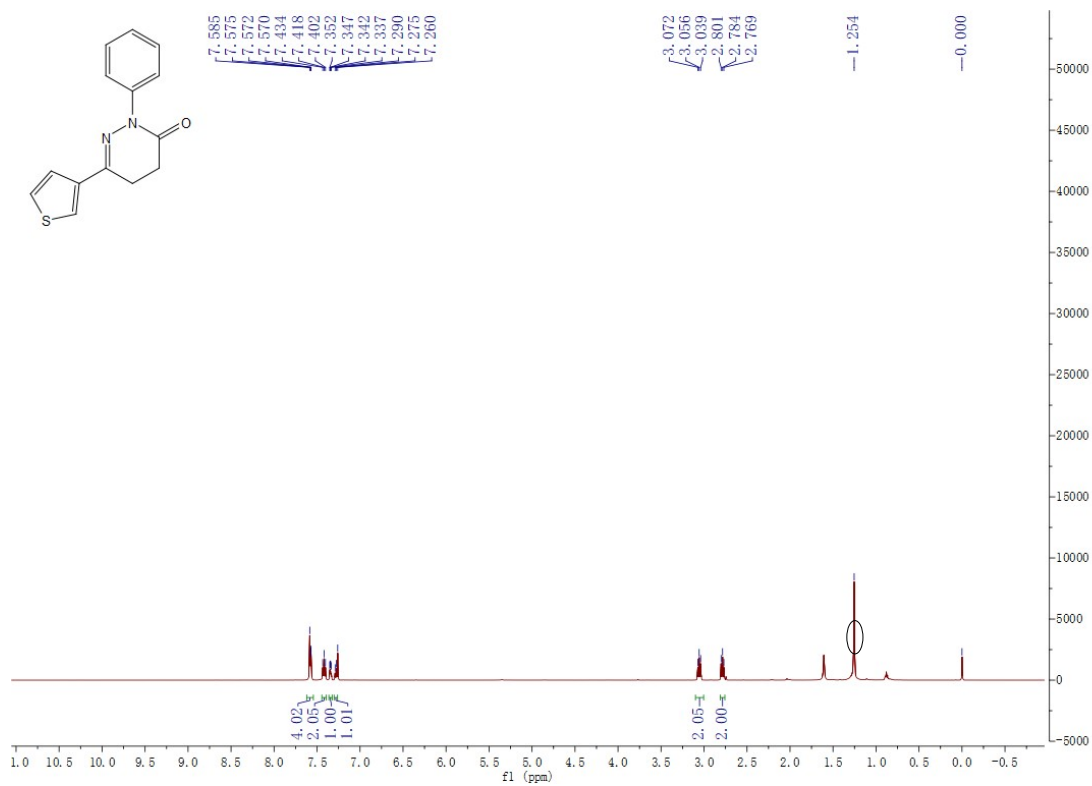

$^1\text{H}$  NMR (500 MHz,  $\text{CDCl}_3$ ) of compound **7n**

The peak in black oval is the signal of Apiezon grease.

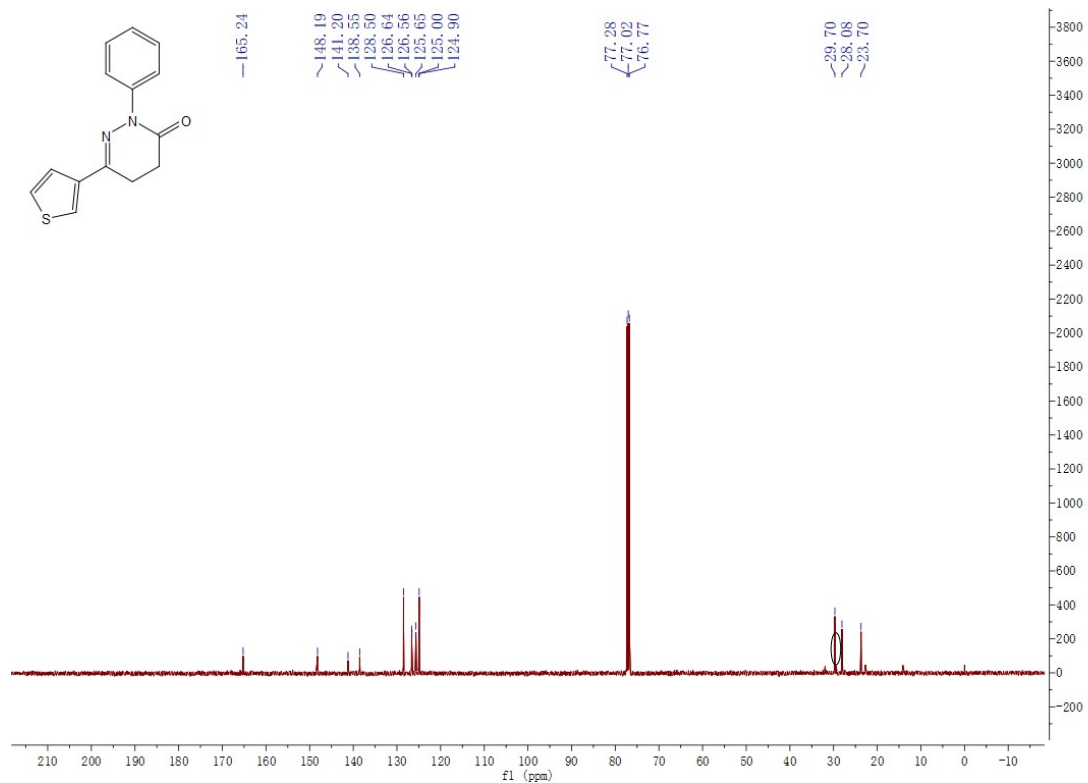

$^{13}\text{C}$  NMR (125 MHz,  $\text{CDCl}_3$ ) of compound **7n**

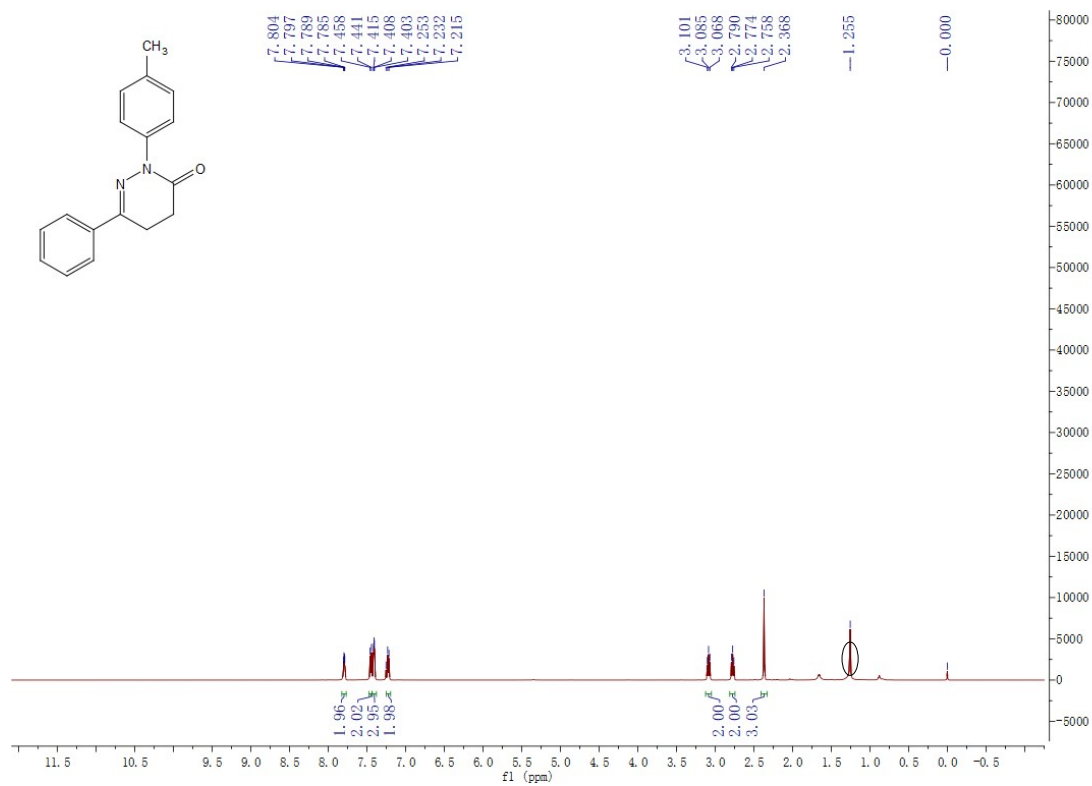

$^1\text{H}$  NMR (500 MHz,  $\text{CDCl}_3$ ) of compound **7o**

The peak in black oval is the signal of Apiezon grease.

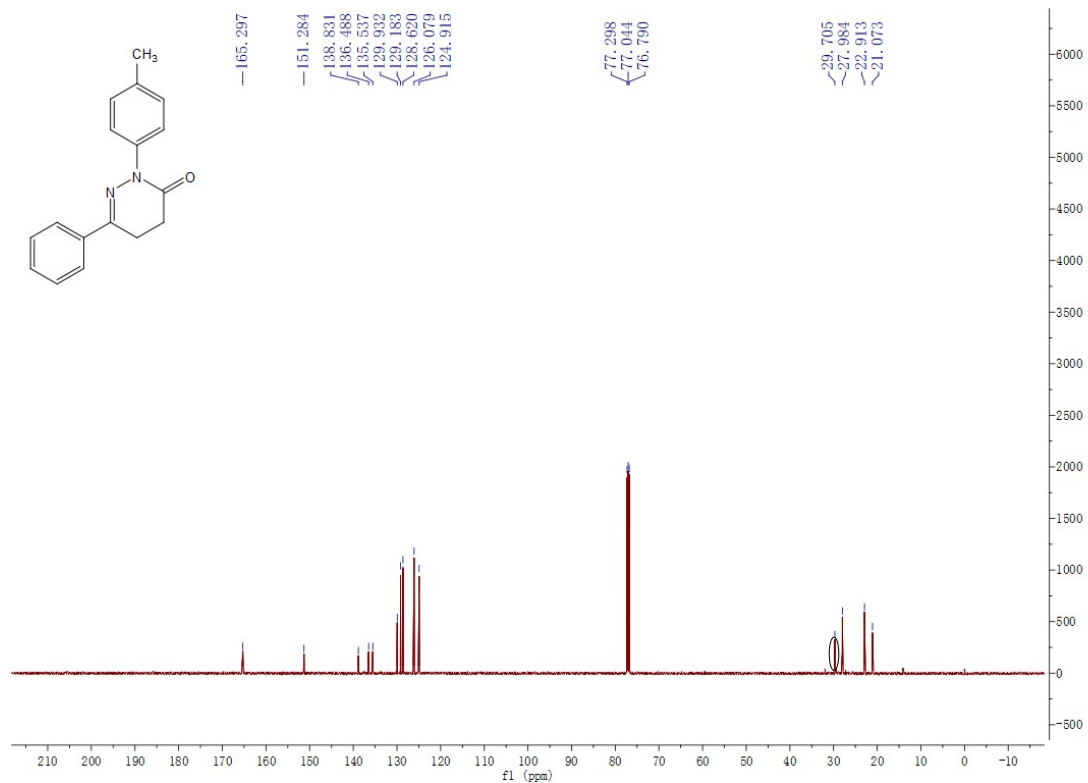

$^{13}\text{C}$  NMR (125 MHz,  $\text{CDCl}_3$ ) of compound **7o**

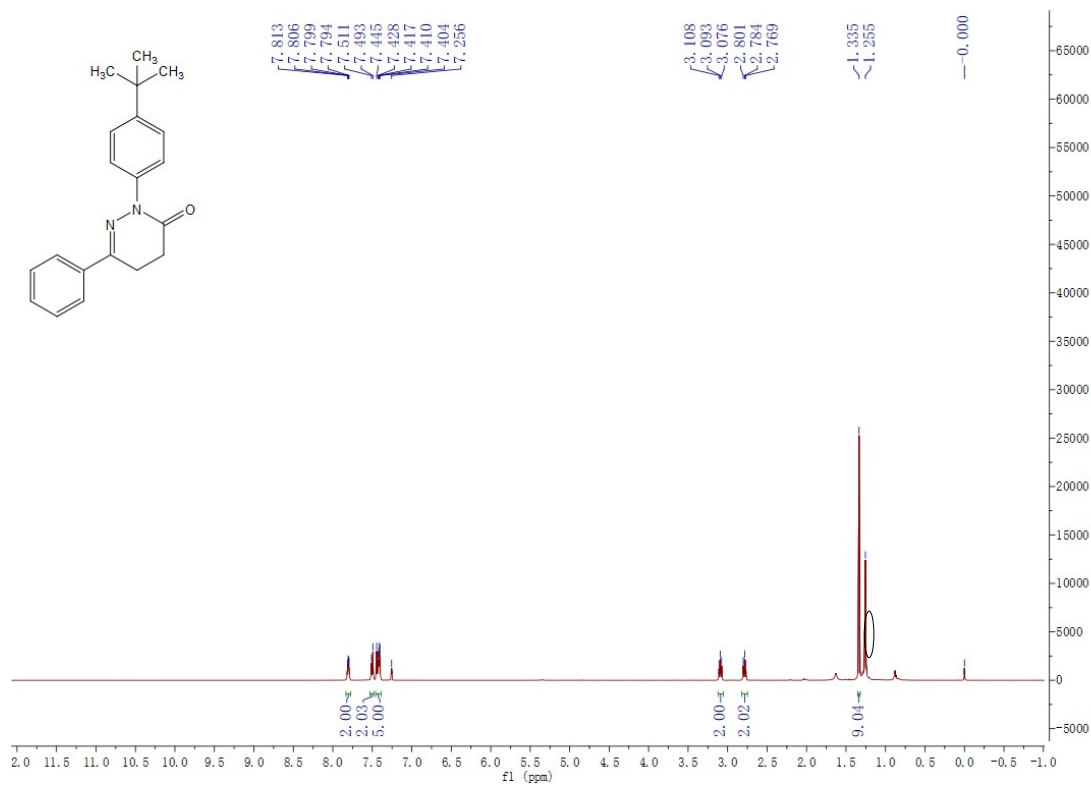

$^1\text{H}$  NMR (500 MHz,  $\text{CDCl}_3$ ) of compound **7p**

The peak in black oval is the signal of Apiezon grease.

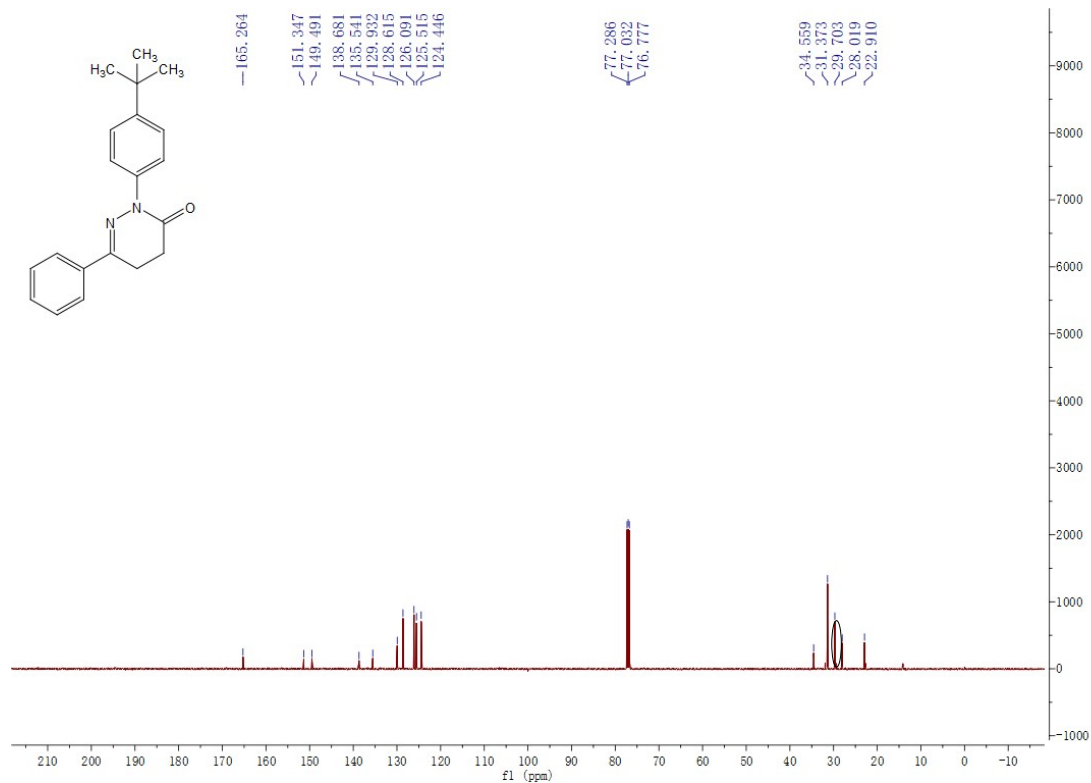

<sup>13</sup>C NMR (125 MHz, CDCl<sub>3</sub>) of compound **7p**

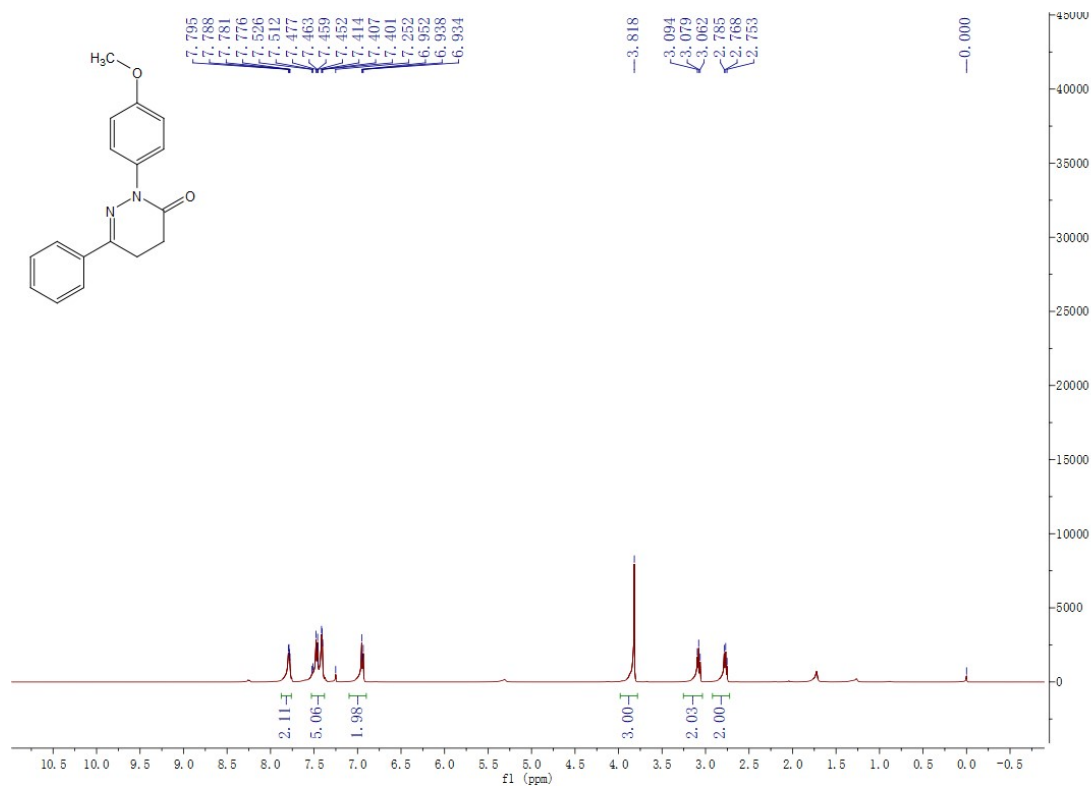

<sup>1</sup>H NMR (500 MHz, CDCl<sub>3</sub>) of compound **7q**



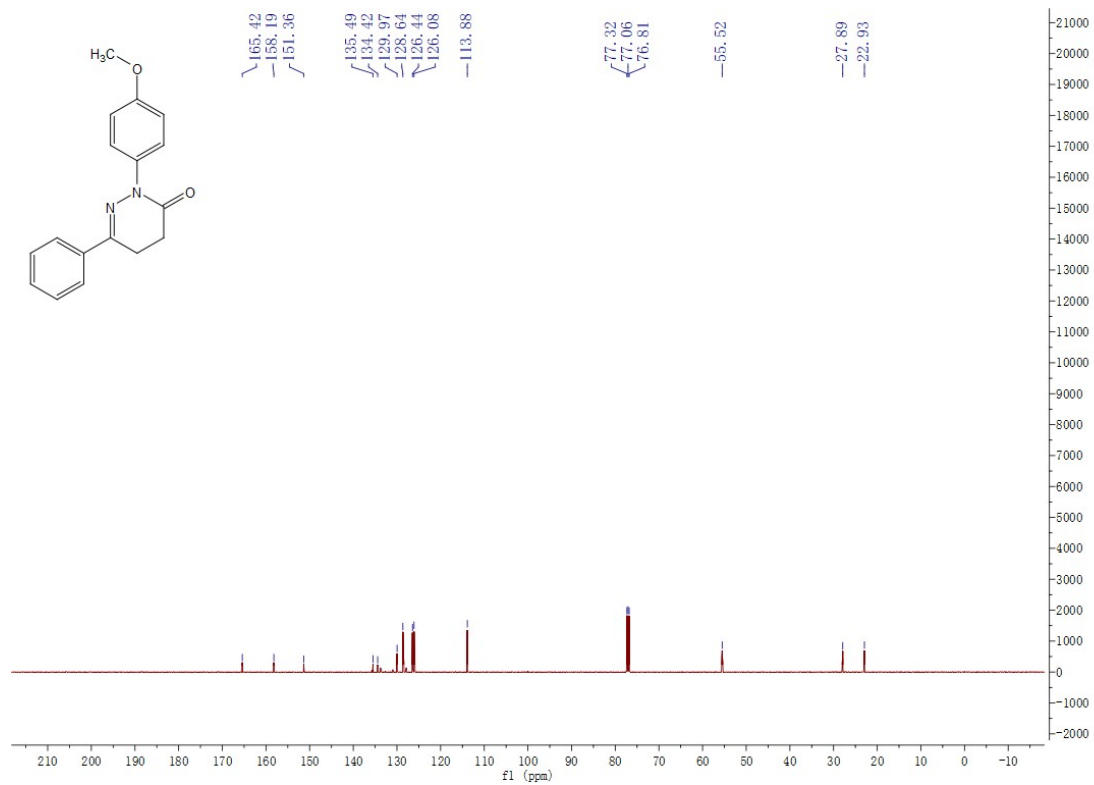

<sup>13</sup>C NMR (125 MHz, CDCl<sub>3</sub>) of compound **7q**

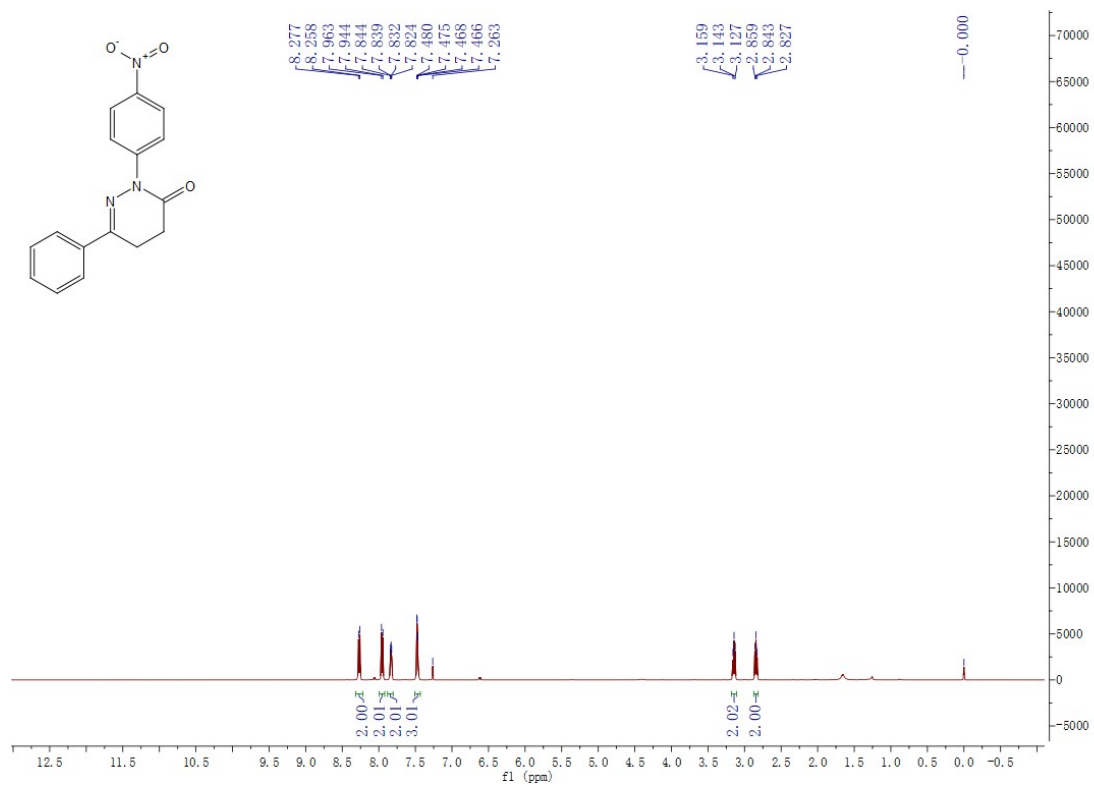

<sup>1</sup>H NMR (500 MHz, CDCl<sub>3</sub>) of compound **7r**

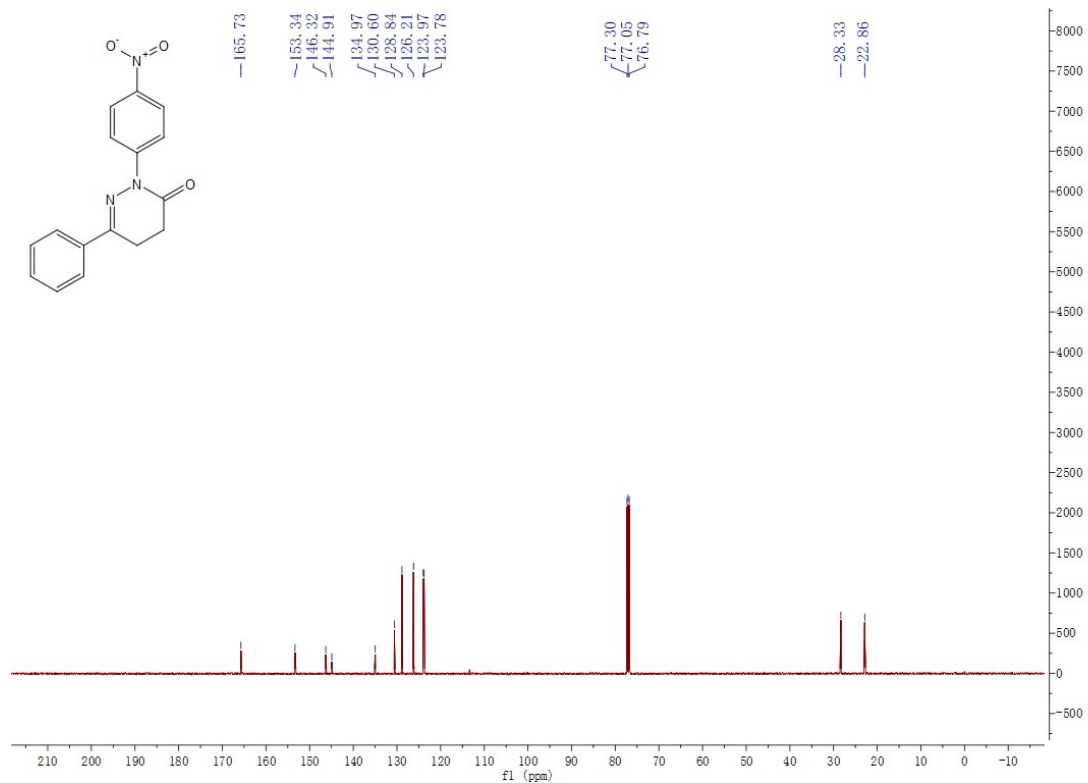

<sup>13</sup>C NMR (125 MHz, CDCl<sub>3</sub>) of compound **7r**

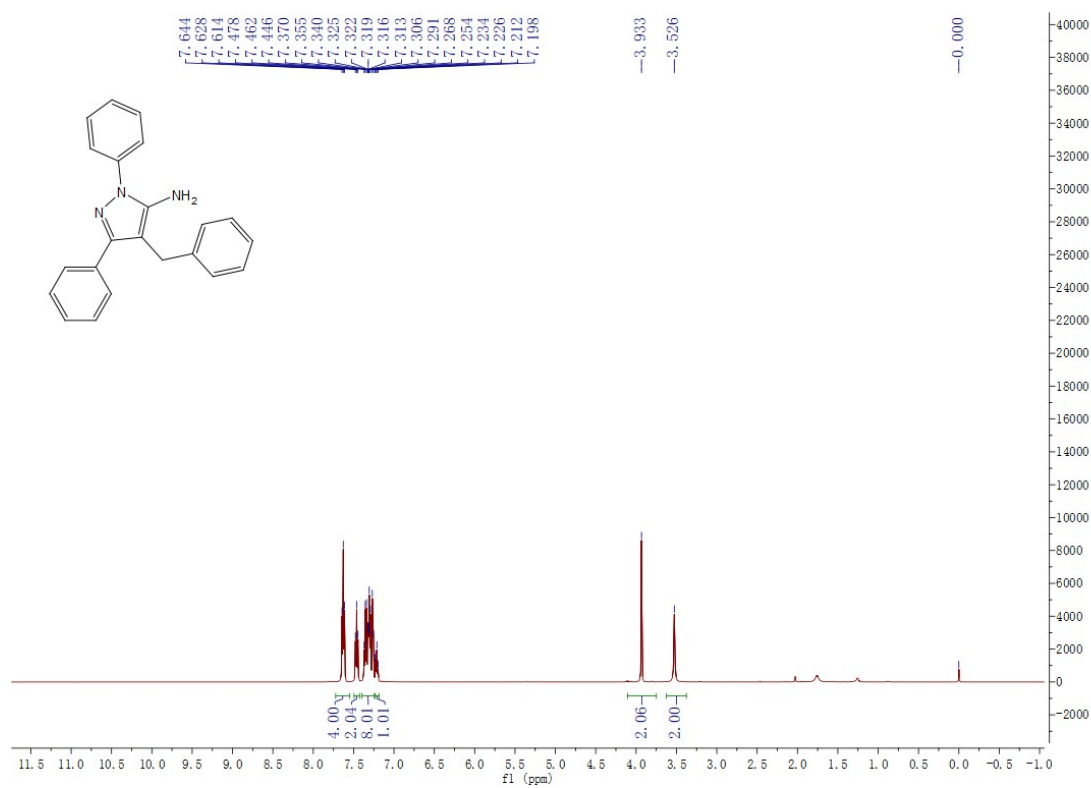

<sup>1</sup>H NMR (500 MHz, CDCl<sub>3</sub>) of compound **4x**

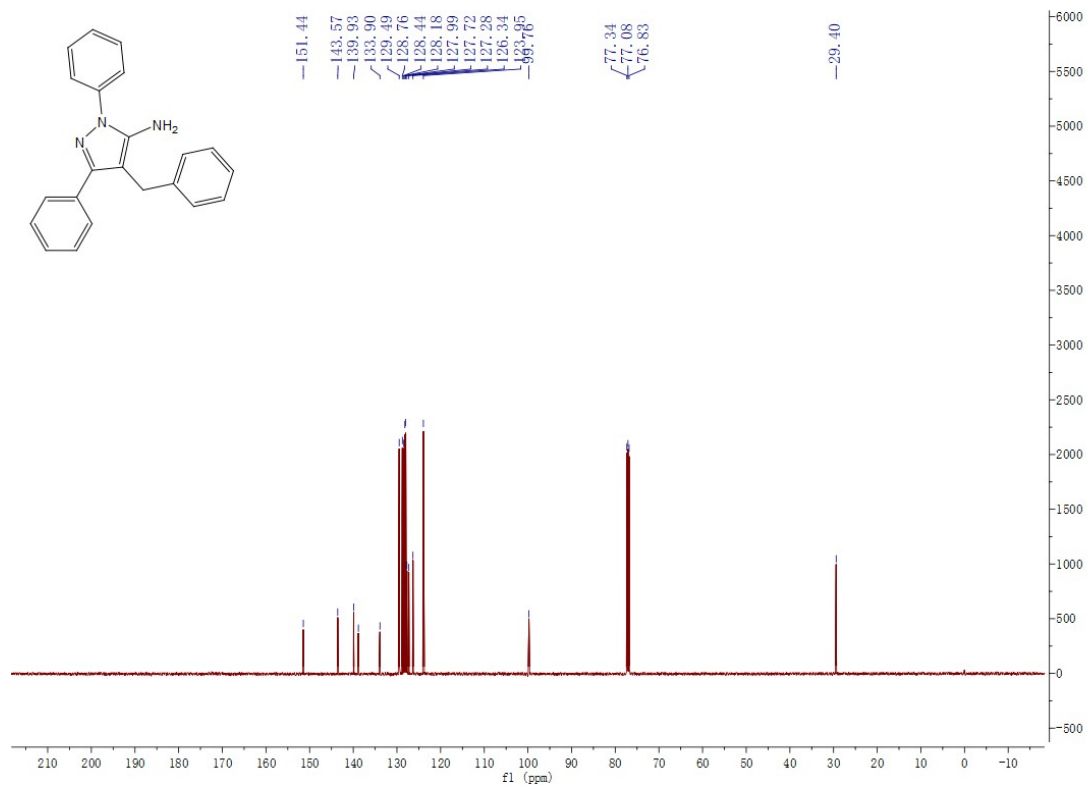

$^{13}\text{C}$  NMR (125 MHz,  $\text{CDCl}_3$ ) of compound **4x**

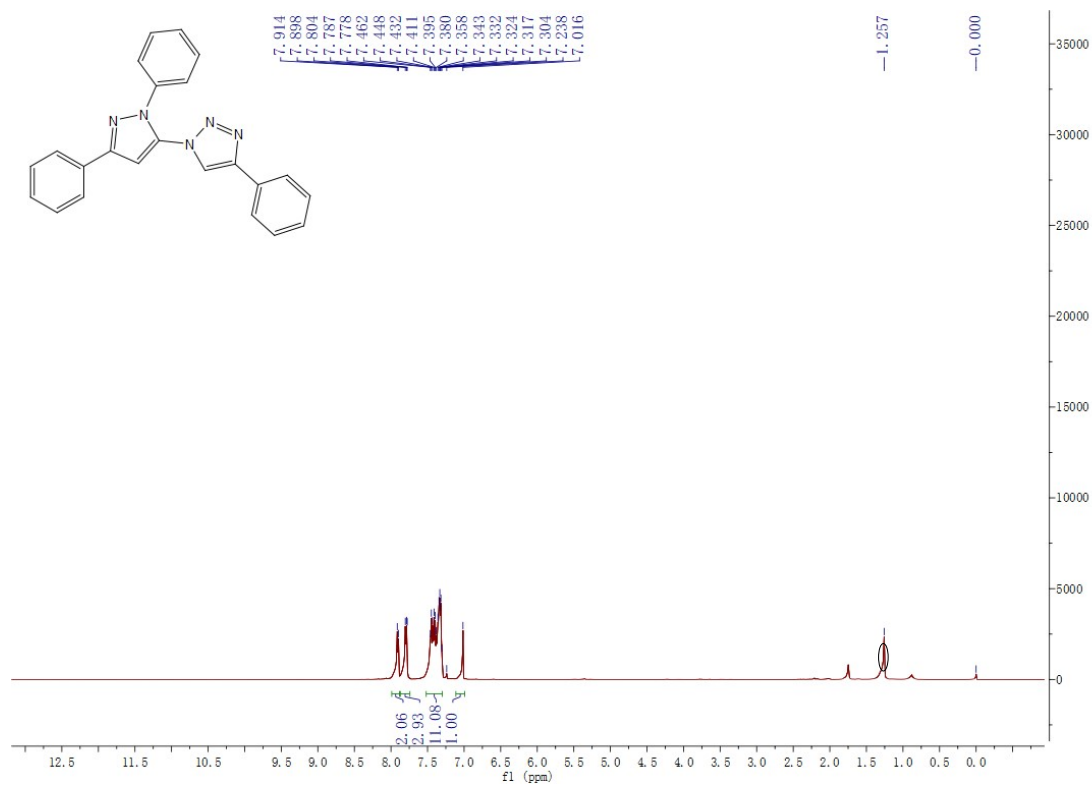

$^1\text{H}$  NMR (500 MHz,  $\text{CDCl}_3$ ) of compound **8a**

The peak in black oval is the signal of Apiezon grease.

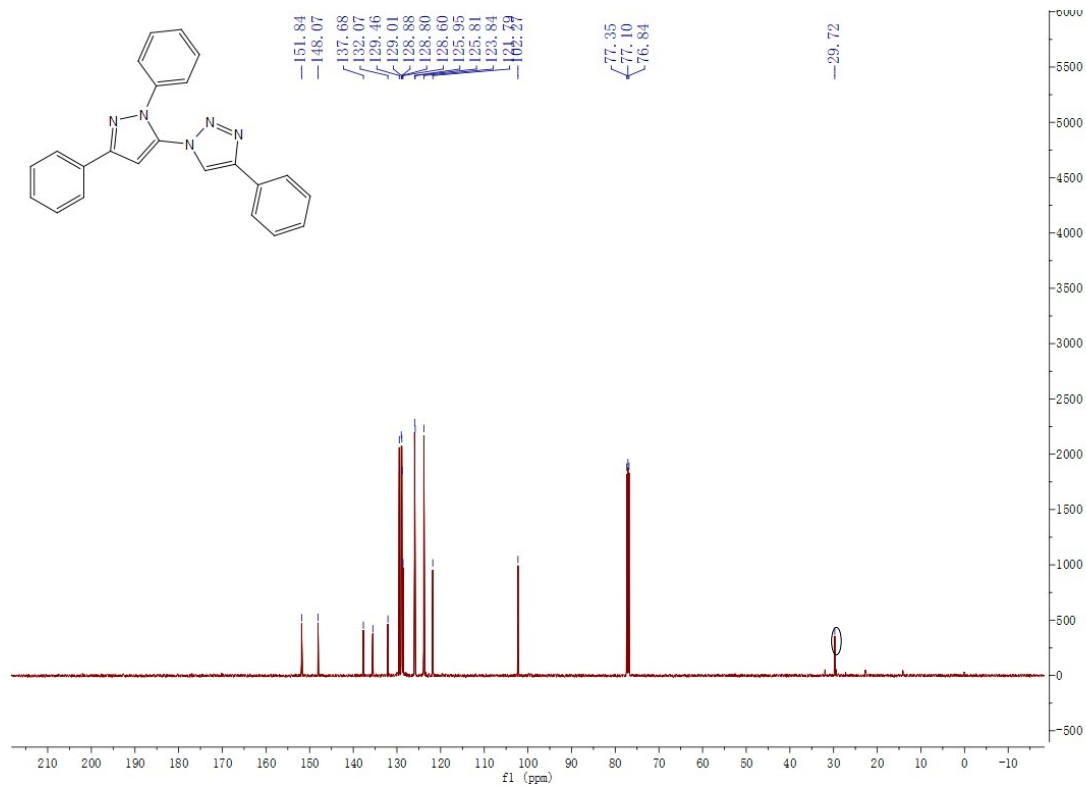

$^{13}\text{C}$  NMR (125 MHz,  $\text{CDCl}_3$ ) of compound **8a**

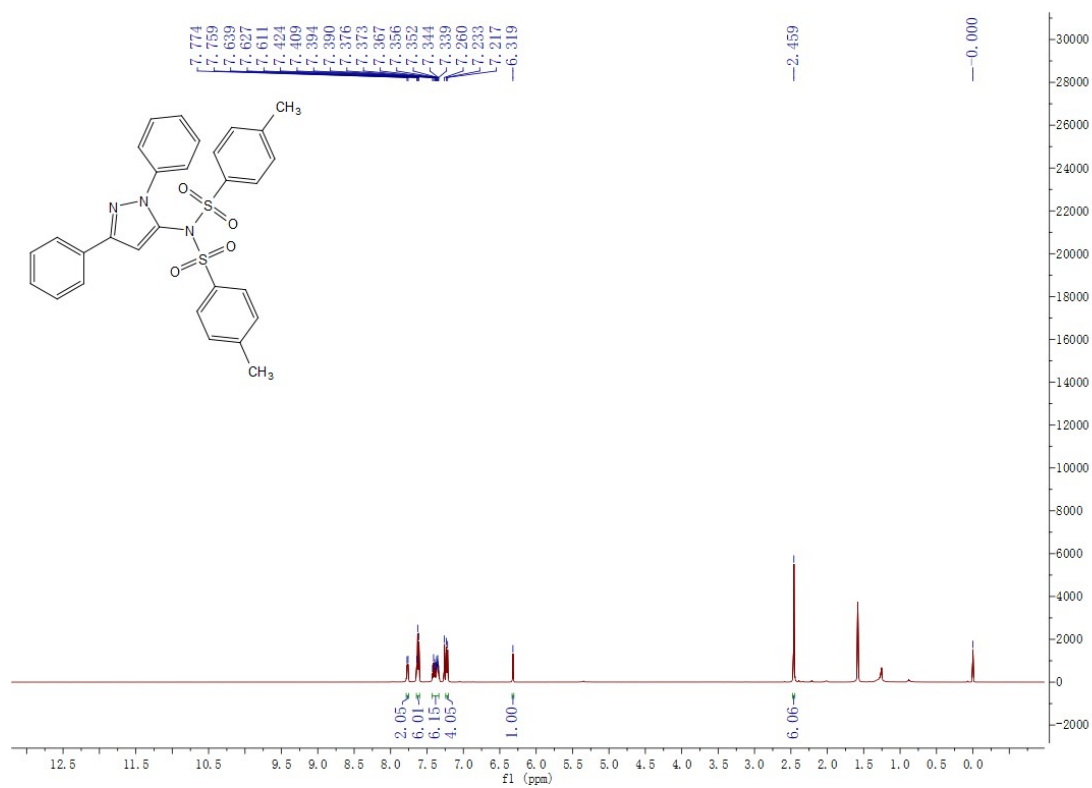

$^1\text{H}$  NMR (500 MHz,  $\text{CDCl}_3$ ) of compound **8b**

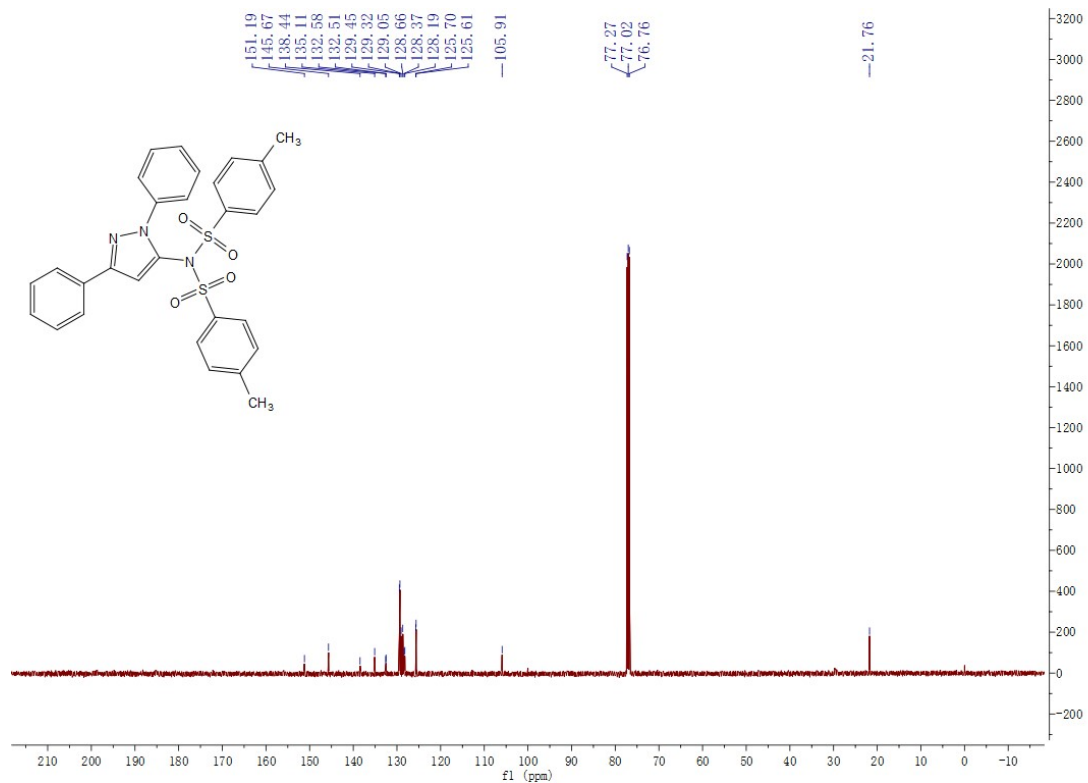

<sup>13</sup>C NMR (125 MHz, CDCl<sub>3</sub>) of compound **8b**

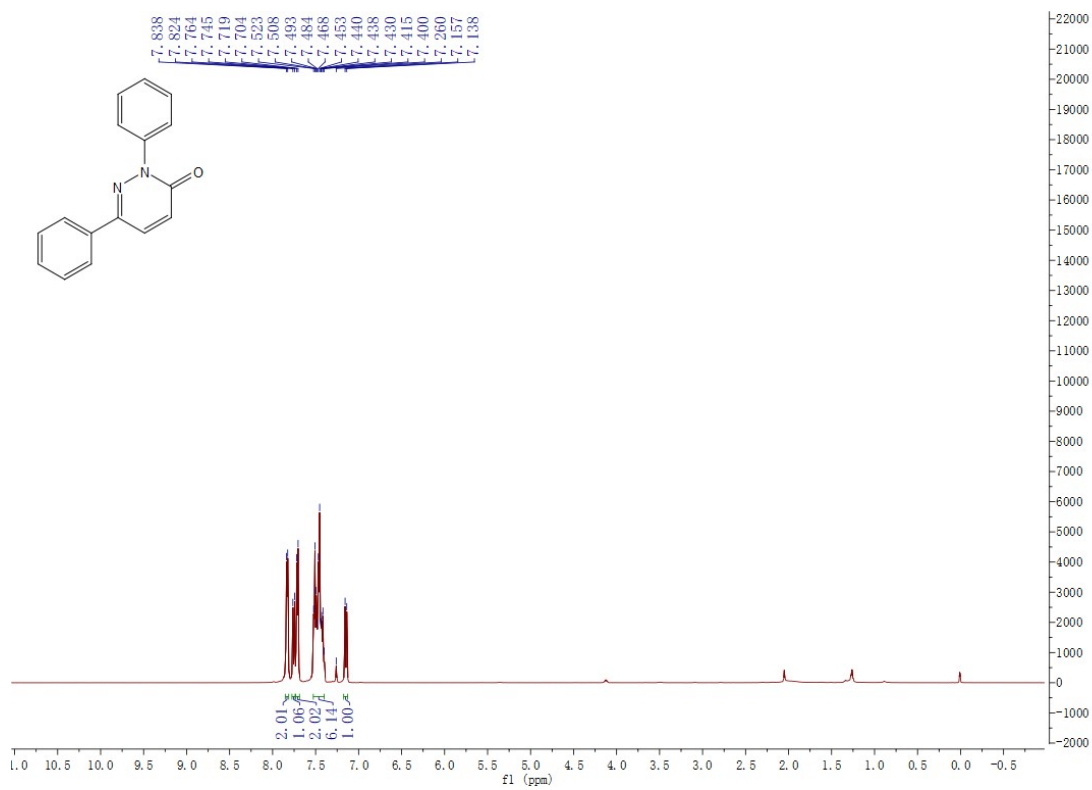

<sup>1</sup>H NMR (500 MHz, CDCl<sub>3</sub>) of compound **8c**

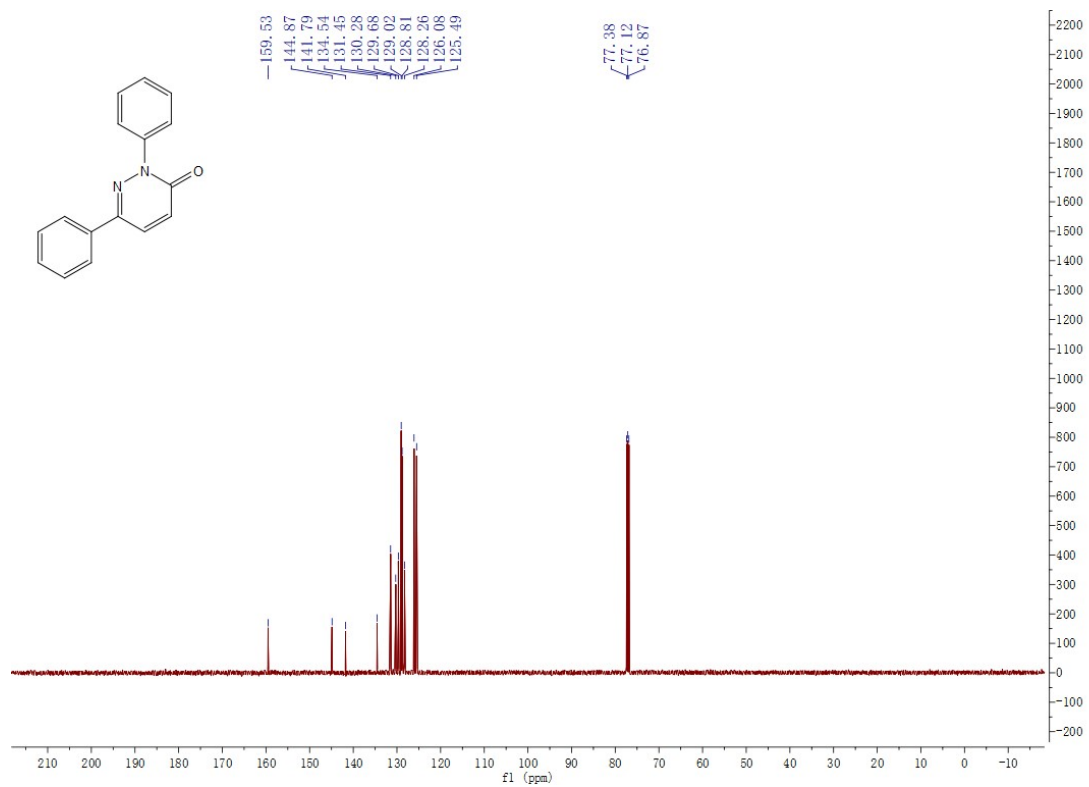

$^{13}\text{C}$  NMR (125 MHz,  $\text{CDCl}_3$ ) of compound **8c**
